# Supplementary material for: The indole motif is essential for the antitrypanosomal activity of N5-substituted paullones
Source: PubMed Central journal article supplement (PMC10688702; doi:10.1371/journal.pone.0292946), 2023-11-30
Supplement: pone.0292946.s001.pdf [file pone.0292946.s001.pdf]

# **The indole motif is essential for the antitrypanosomal activity of N<sup>5</sup>-substituted paullones**

Irina Ihnatenko, Marco J. Müller, Oliver C. F. Orban, Jens C. Lindhof, Diego Benítez, Cecilia Ortíz, Estefanía Dibello, Leonardo L. Seidl, Marcelo A. Comini and Conrad Kunick\*

**S1 File. Figs 1–42. <sup>1</sup>H-NMR spectra of benzazepinones and paullones tested in biological assays.**

**Table of contents:** <sup>1</sup>H-NMR spectra of benzazepinones and paullones tested in biological assays.

|                                                                  |    |                                                                   |    |                                                                    |    |
|------------------------------------------------------------------|----|-------------------------------------------------------------------|----|--------------------------------------------------------------------|----|
| S1 File. Fig 1. <sup>1</sup> H-NMR spectrum of compound 1f.....  | 3  | S1 File. Fig 15. <sup>1</sup> H-NMR spectrum of compound 2p. .... | 17 | S1 File. Fig 29. <sup>1</sup> H-NMR spectrum of compound 5b. ....  | 31 |
| S1 File. Fig 2. <sup>1</sup> H-NMR spectrum of compound 1g.....  | 4  | S1 File. Fig 16. <sup>1</sup> H-NMR spectrum of compound 2q. .... | 18 | S1 File. Fig 30. <sup>1</sup> H-NMR spectrum of compound 5c.....   | 32 |
| S1 File. Fig 3. <sup>1</sup> H-NMR spectrum of compound 1h.....  | 5  | S1 File. Fig 17. <sup>1</sup> H-NMR spectrum of compound 2r.....  | 19 | S1 File. Fig 31. <sup>1</sup> H-NMR spectrum of compound 5d. ....  | 33 |
| S1 File. Fig 4. <sup>1</sup> H-NMR spectrum of compound 2b.....  | 6  | S1 File. Fig 18. <sup>1</sup> H-NMR spectrum of compound 2s. .... | 20 | S1 File. Fig 32. <sup>1</sup> H-NMR spectrum of compound 9a. ....  | 34 |
| S1 File. Fig 5. <sup>1</sup> H-NMR spectrum of compound 2c.....  | 7  | S1 File. Fig 19. <sup>1</sup> H-NMR spectrum of compound 2t. .... | 21 | S1 File. Fig 33. <sup>1</sup> H-NMR spectrum of compound 9b. ....  | 35 |
| S1 File. Fig 6. <sup>1</sup> H-NMR spectrum of compound 2d.....  | 8  | S1 File. Fig 20. <sup>1</sup> H-NMR spectrum of compound 2u. .... | 22 | S1 File. Fig 34. <sup>1</sup> H-NMR spectrum of compound 9c.....   | 36 |
| S1 File. Fig 7. <sup>1</sup> H-NMR spectrum of compound 2e.....  | 9  | S1 File. Fig 21. <sup>1</sup> H-NMR spectrum of compound 2v. .... | 23 | S1 File. Fig 35. <sup>1</sup> H-NMR spectrum of compound 10a. .... | 37 |
| S1 File. Fig 8. <sup>1</sup> H-NMR spectrum of compound 2f.....  | 10 | S1 File. Fig 22. <sup>1</sup> H-NMR spectrum of compound 3b. .... | 24 | S1 File. Fig 36. <sup>1</sup> H-NMR spectrum of compound 10b. .... | 38 |
| S1 File. Fig 9. <sup>1</sup> H-NMR spectrum of compound 2g.....  | 11 | S1 File. Fig 23. <sup>1</sup> H-NMR spectrum of compound 3c. .... | 25 | S1 File. Fig 37. <sup>1</sup> H-NMR spectrum of compound 10c.....  | 39 |
| S1 File. Fig 10. <sup>1</sup> H-NMR spectrum of compound 2h..... | 12 | S1 File. Fig 24. <sup>1</sup> H-NMR spectrum of compound 3d. .... | 26 | S1 File. Fig 38. <sup>1</sup> H-NMR spectrum of compound 18. ....  | 40 |
| S1 File. Fig 11. <sup>1</sup> H-NMR spectrum of compound 2i..... | 13 | S1 File. Fig 25. <sup>1</sup> H-NMR spectrum of compound 3e. .... | 27 | S1 File. Fig 39. <sup>1</sup> H-NMR spectrum of compound 19. ....  | 41 |
| S1 File. Fig 12. <sup>1</sup> H-NMR spectrum of compound 2j..... | 14 | S1 File. Fig 26. <sup>1</sup> H-NMR spectrum of compound 4b. .... | 28 | S1 File. Fig 40. <sup>1</sup> H-NMR spectrum of compound 20. ....  | 42 |
| S1 File. Fig 13. <sup>1</sup> H-NMR spectrum of compound 2k..... | 15 | S1 File. Fig 27. <sup>1</sup> H-NMR spectrum of compound 4c. .... | 29 | S1 File. Fig 41. <sup>1</sup> H-NMR spectrum of compound 21. ....  | 43 |
| S1 File. Fig 14. <sup>1</sup> H-NMR spectrum of compound 2o..... | 16 | S1 File. Fig 28. <sup>1</sup> H-NMR spectrum of compound 4d. .... | 30 | S1 File. Fig 42. <sup>1</sup> H-NMR spectrum of compound 22. ....  | 44 |



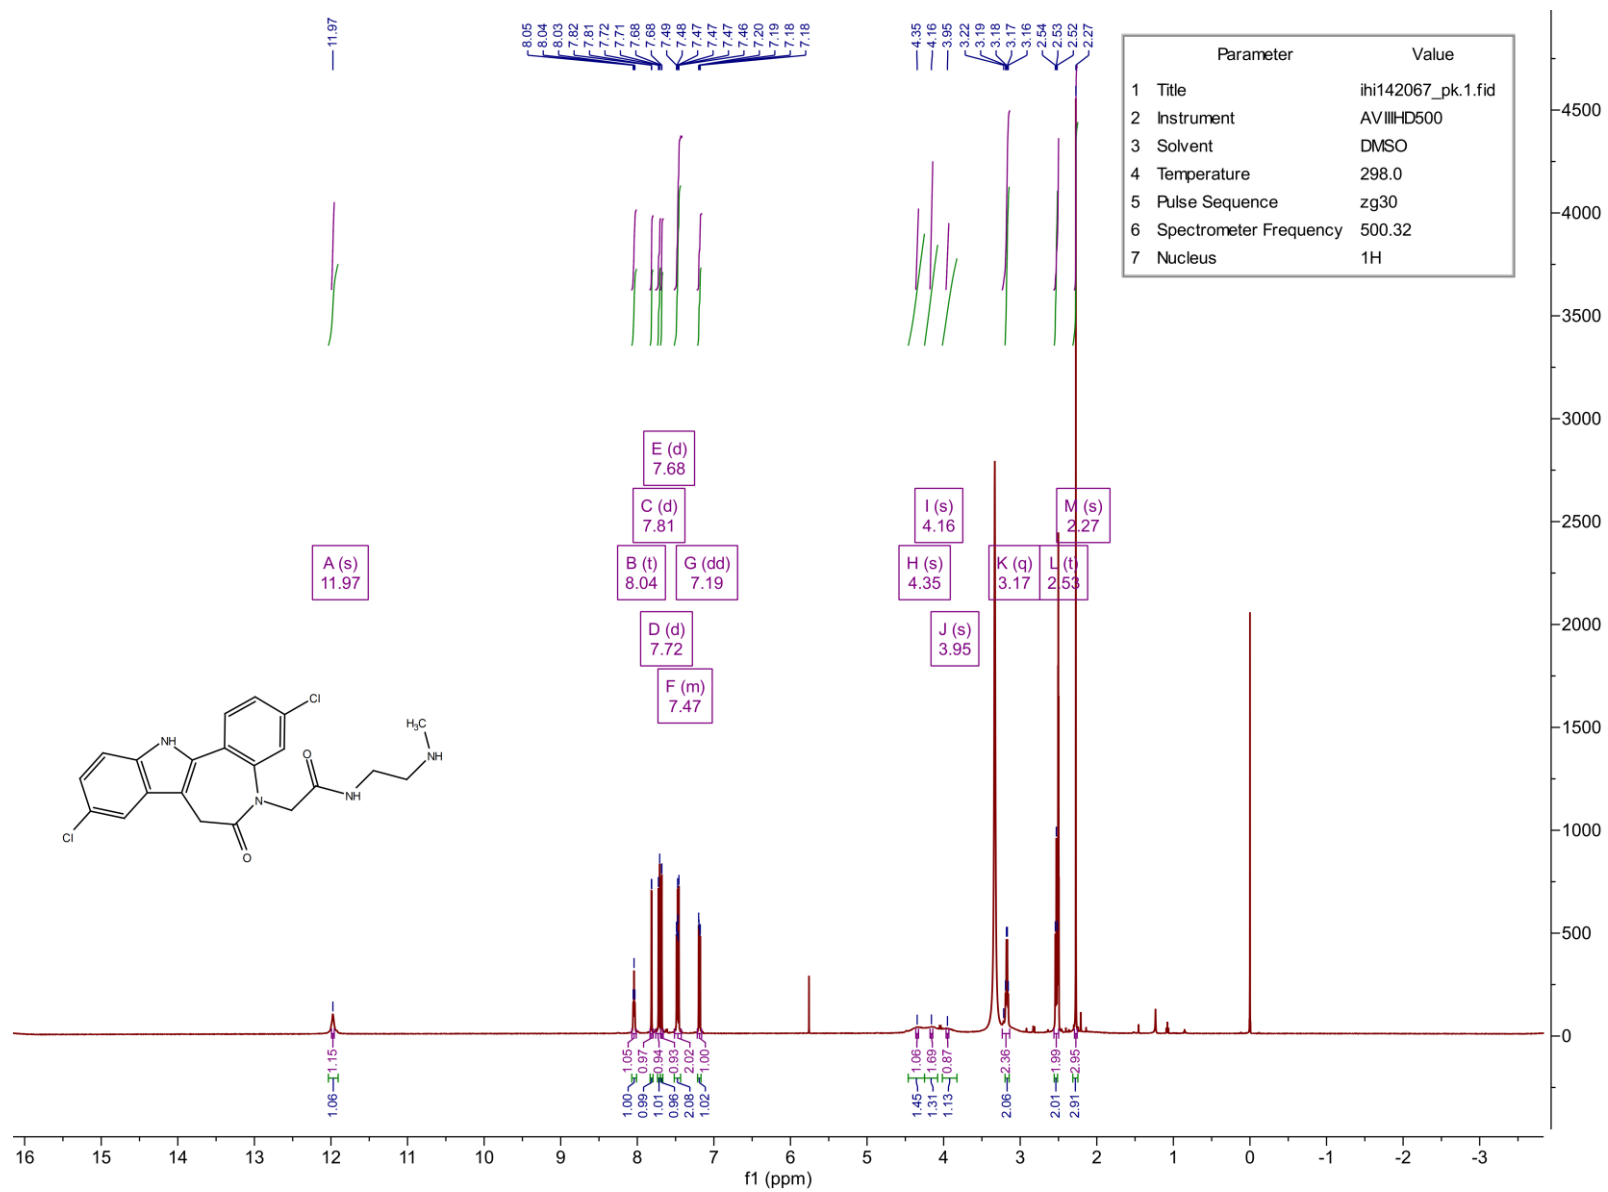

S1 File. Fig 2. <sup>1</sup>H-NMR spectrum of compound 1g.



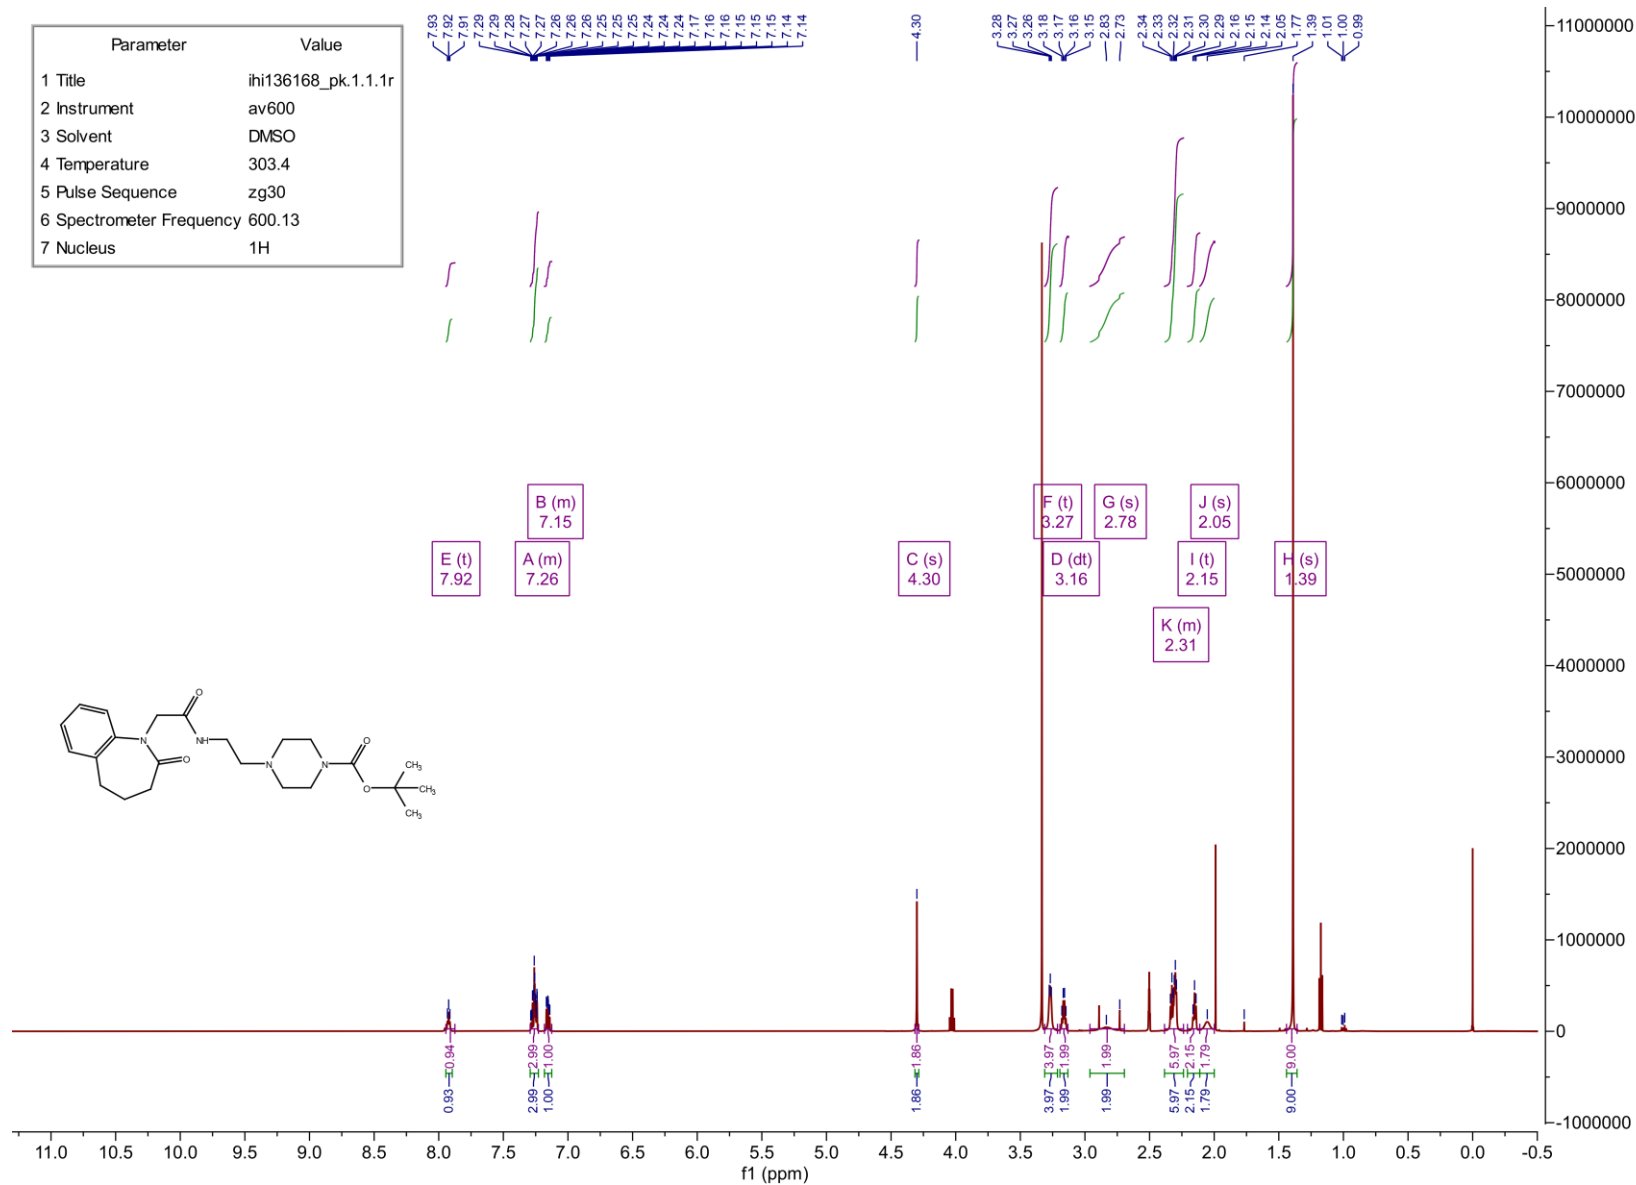

S1 File. Fig 4. <sup>1</sup>H-NMR spectrum of compound 2b.

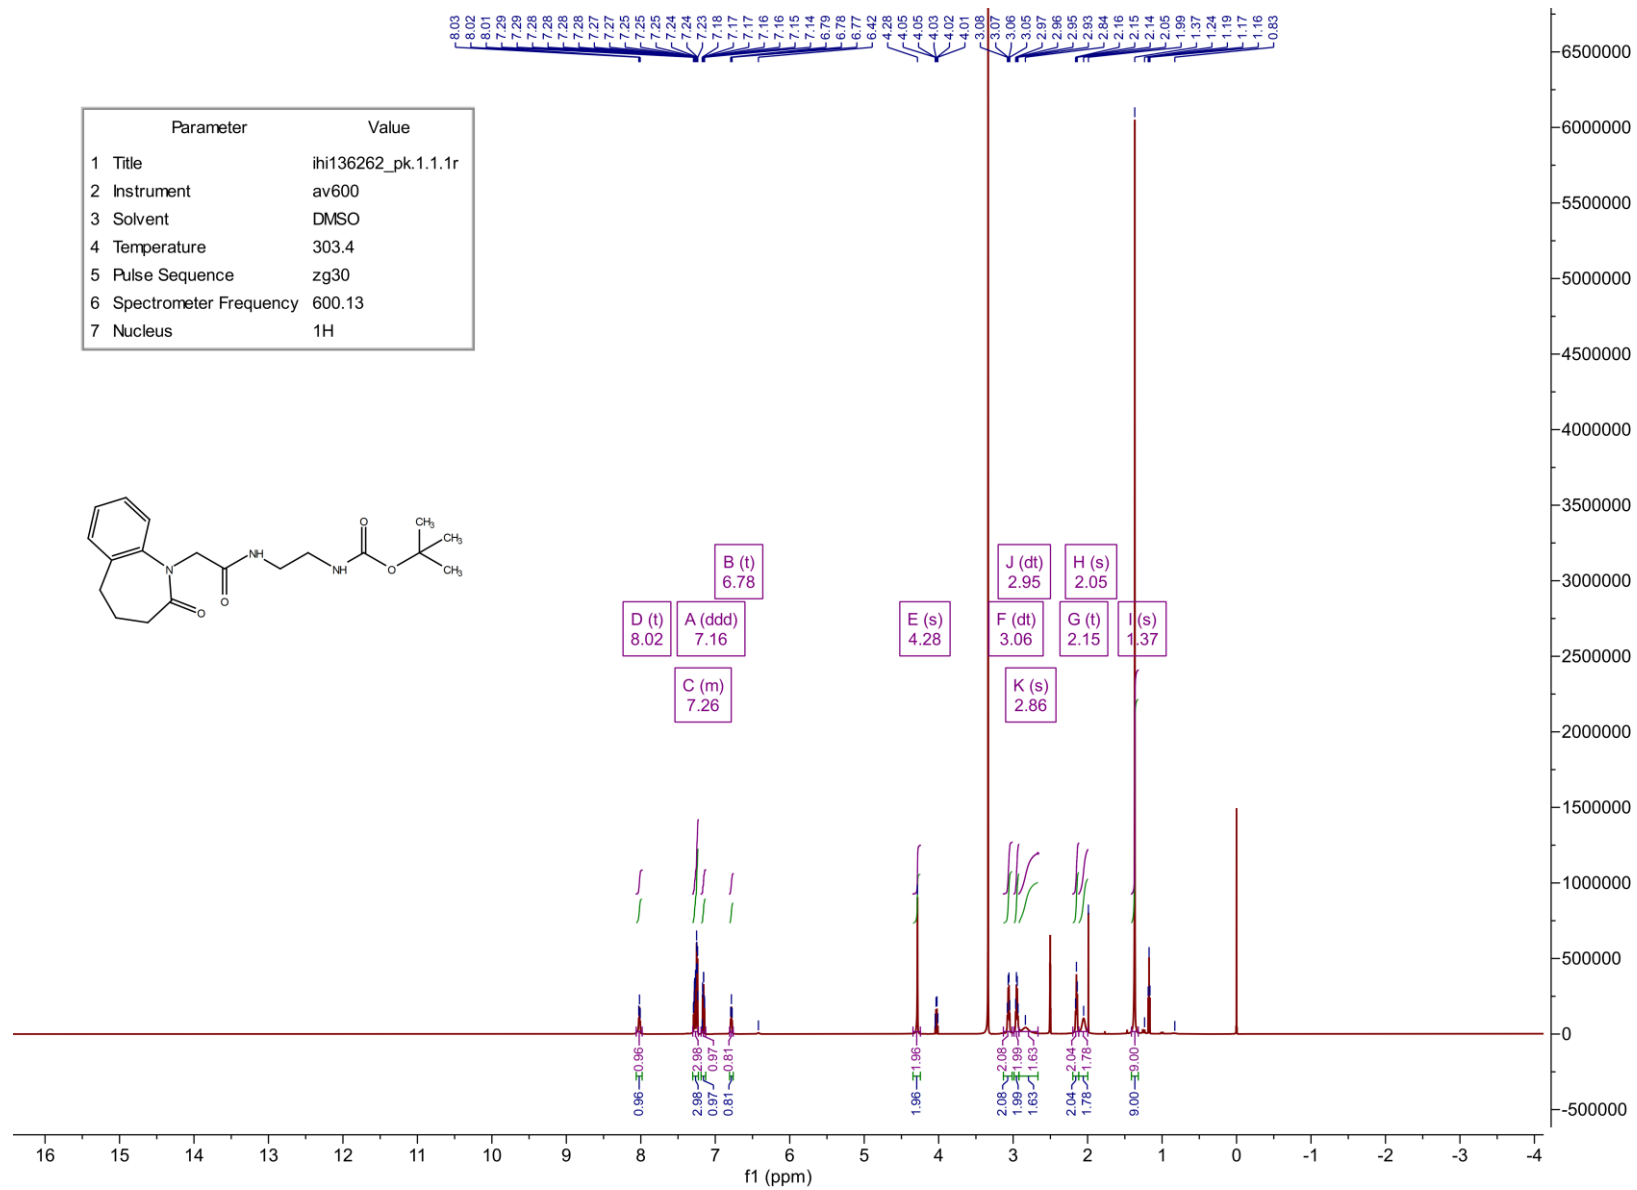

S1 File. Fig 5. <sup>1</sup>H-NMR spectrum of compound 2c.

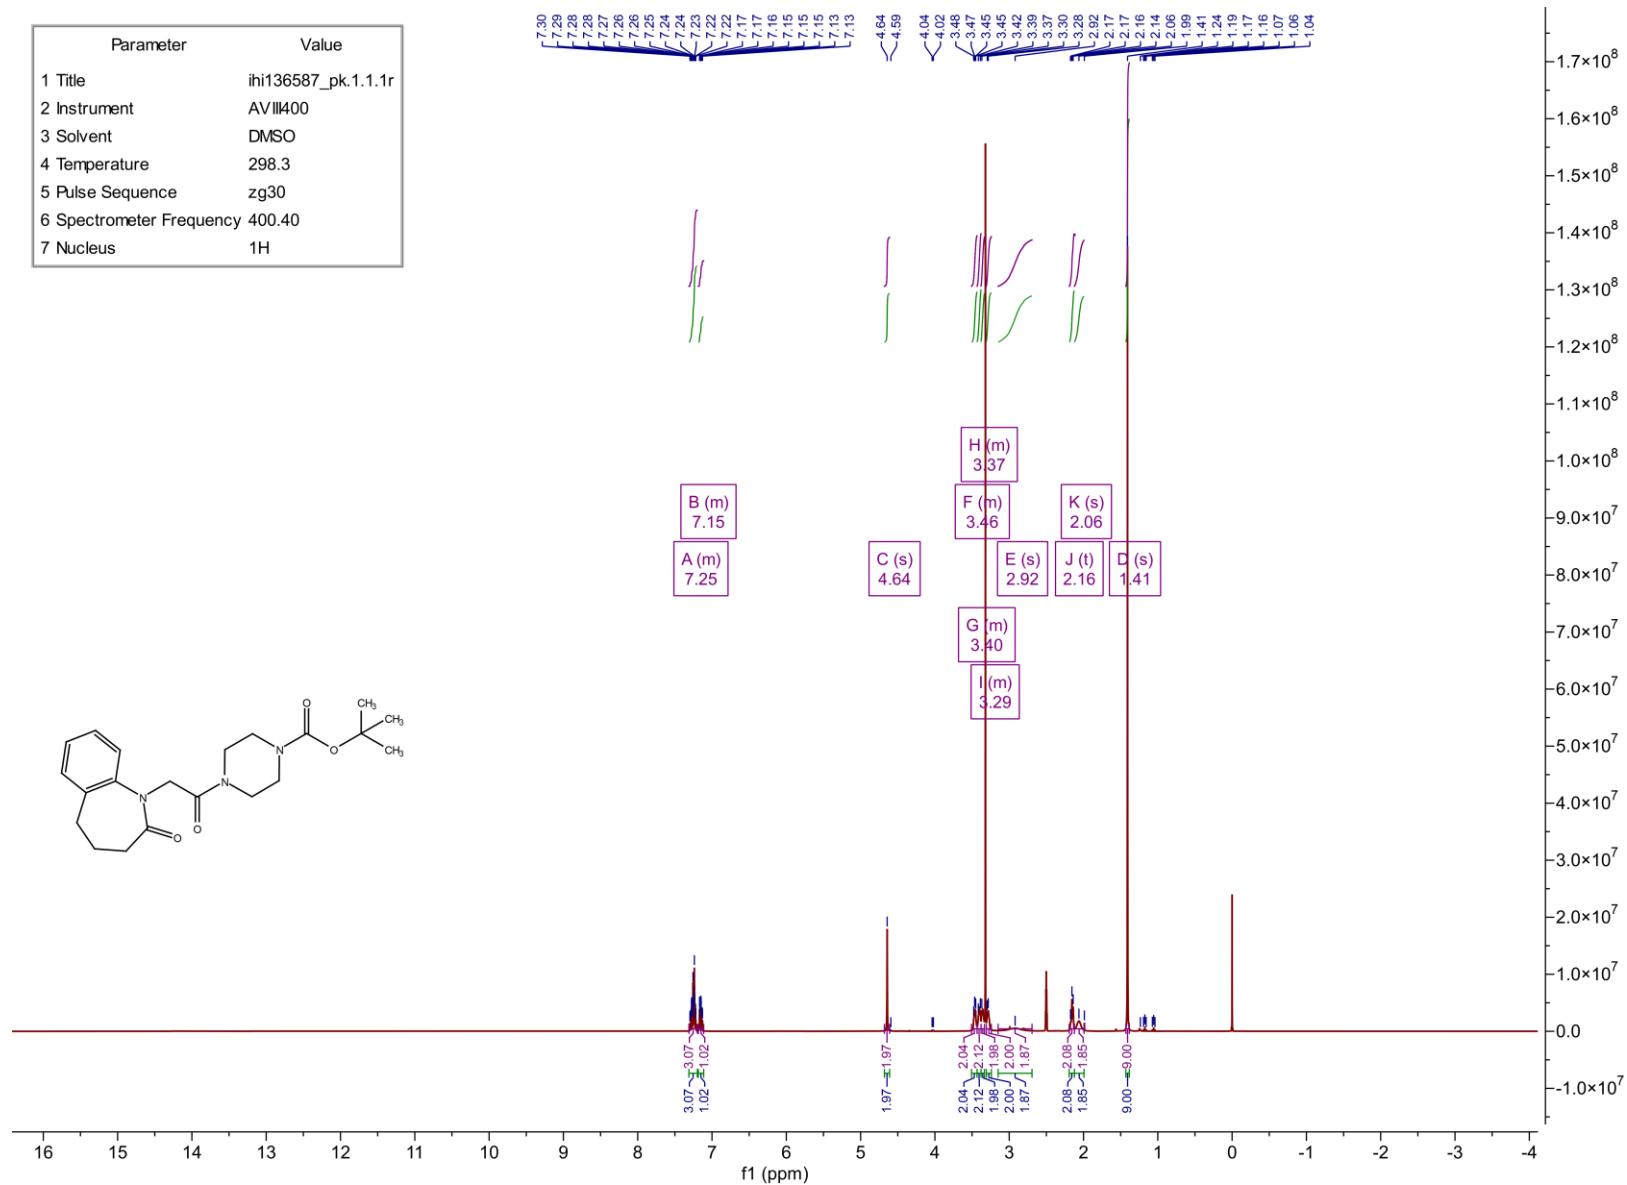

S1 File. Fig 6. <sup>1</sup>H-NMR spectrum of compound 2d.



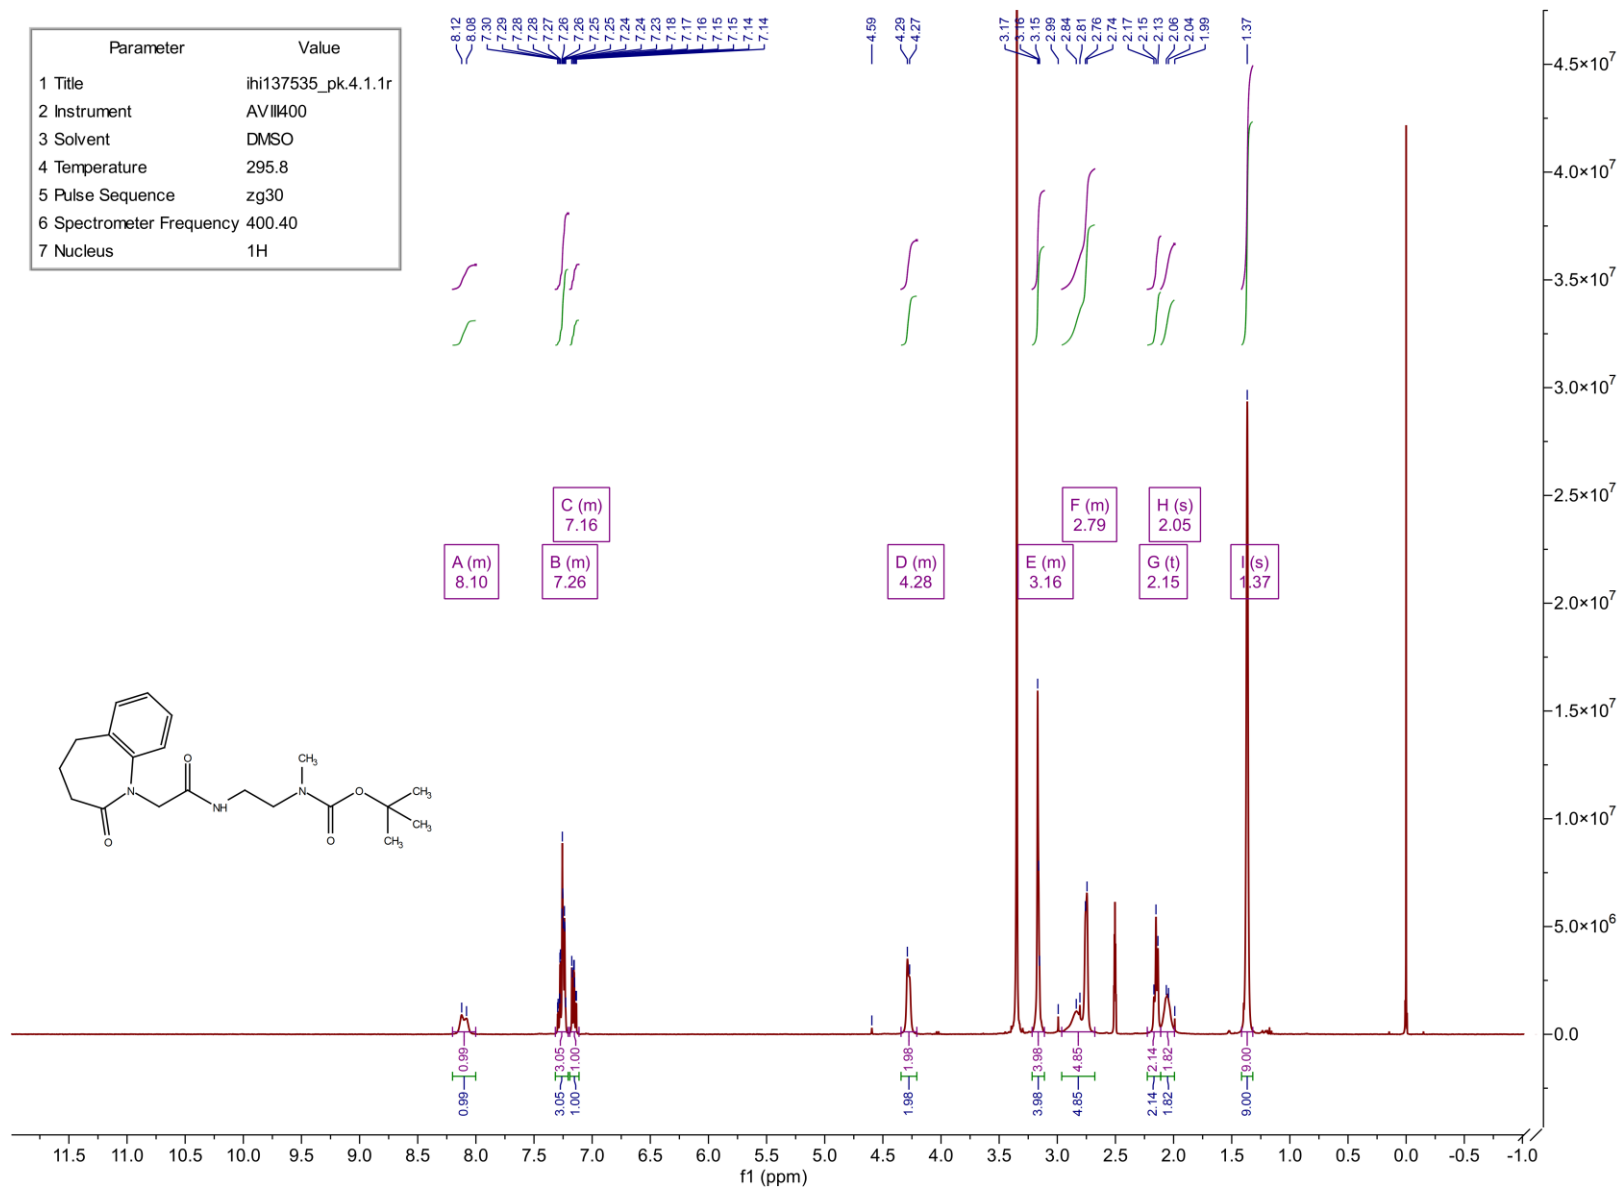

S1 File. Fig 7. <sup>1</sup>H-NMR spectrum of compound 2e.

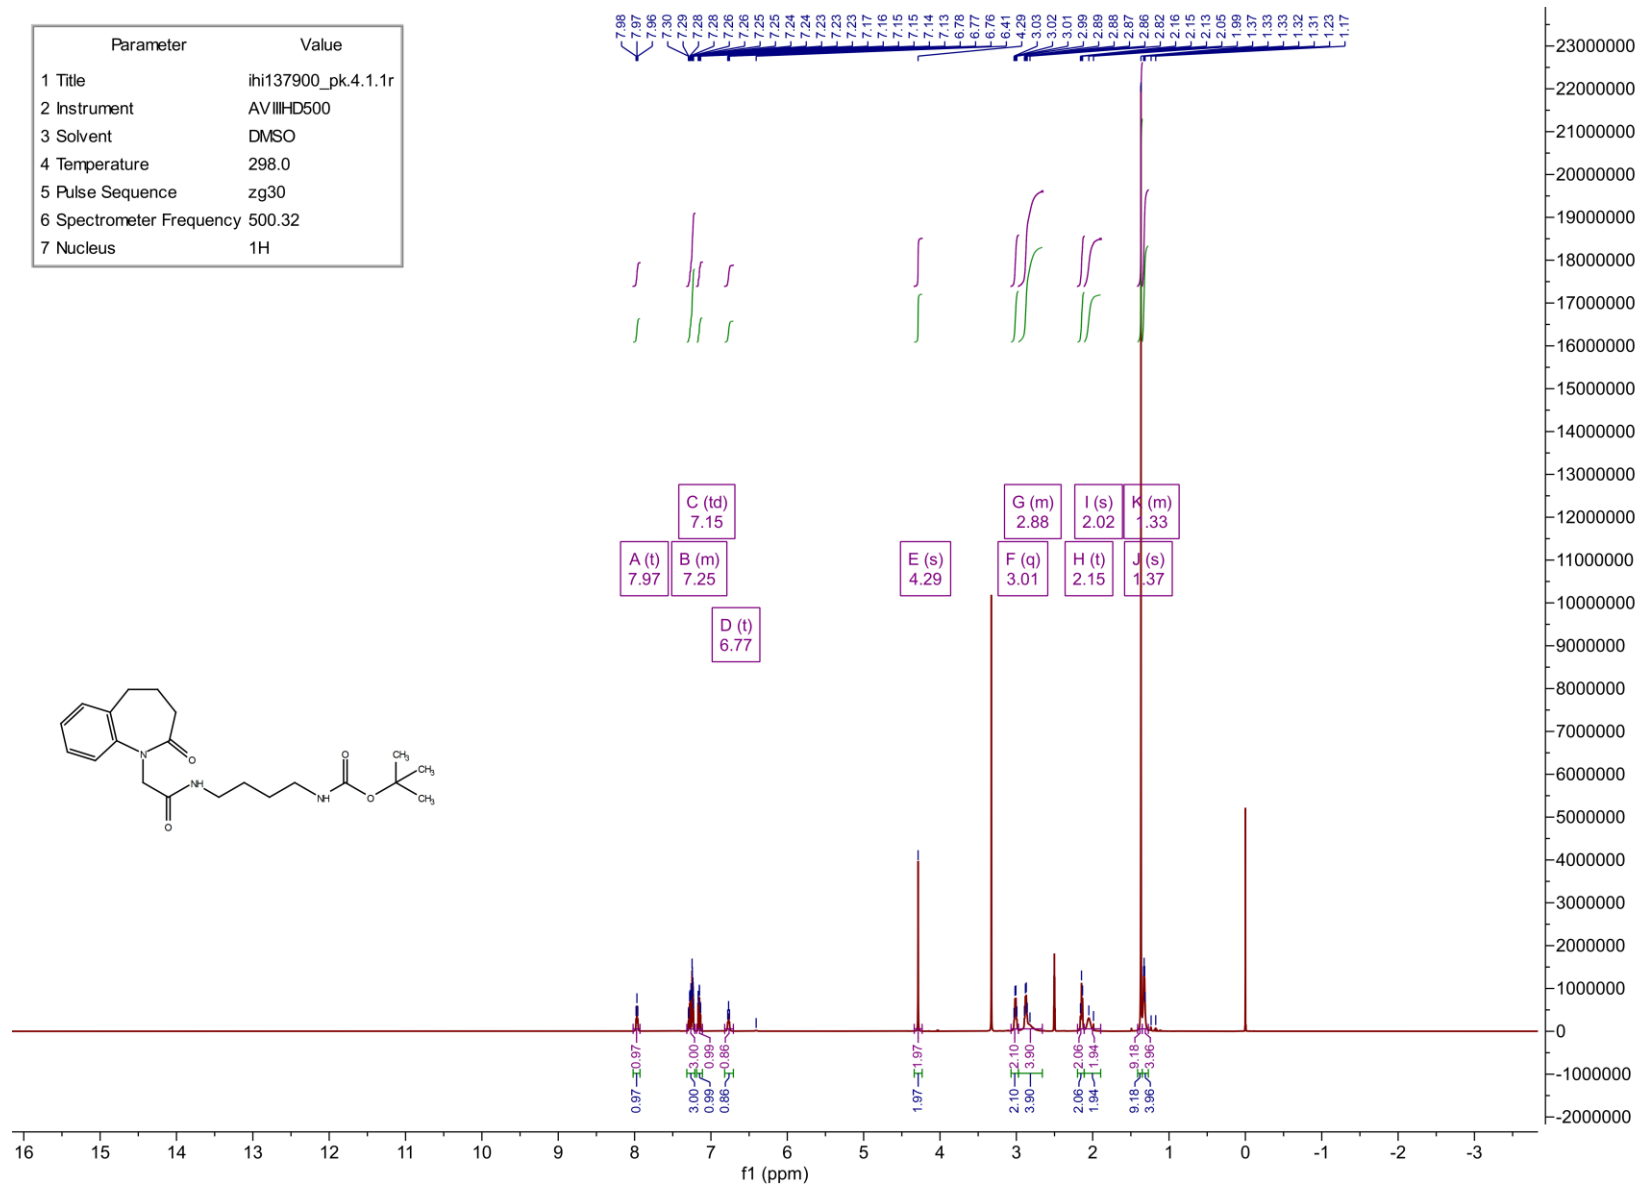

S1 File. Fig 8. <sup>1</sup>H-NMR spectrum of compound 2f.

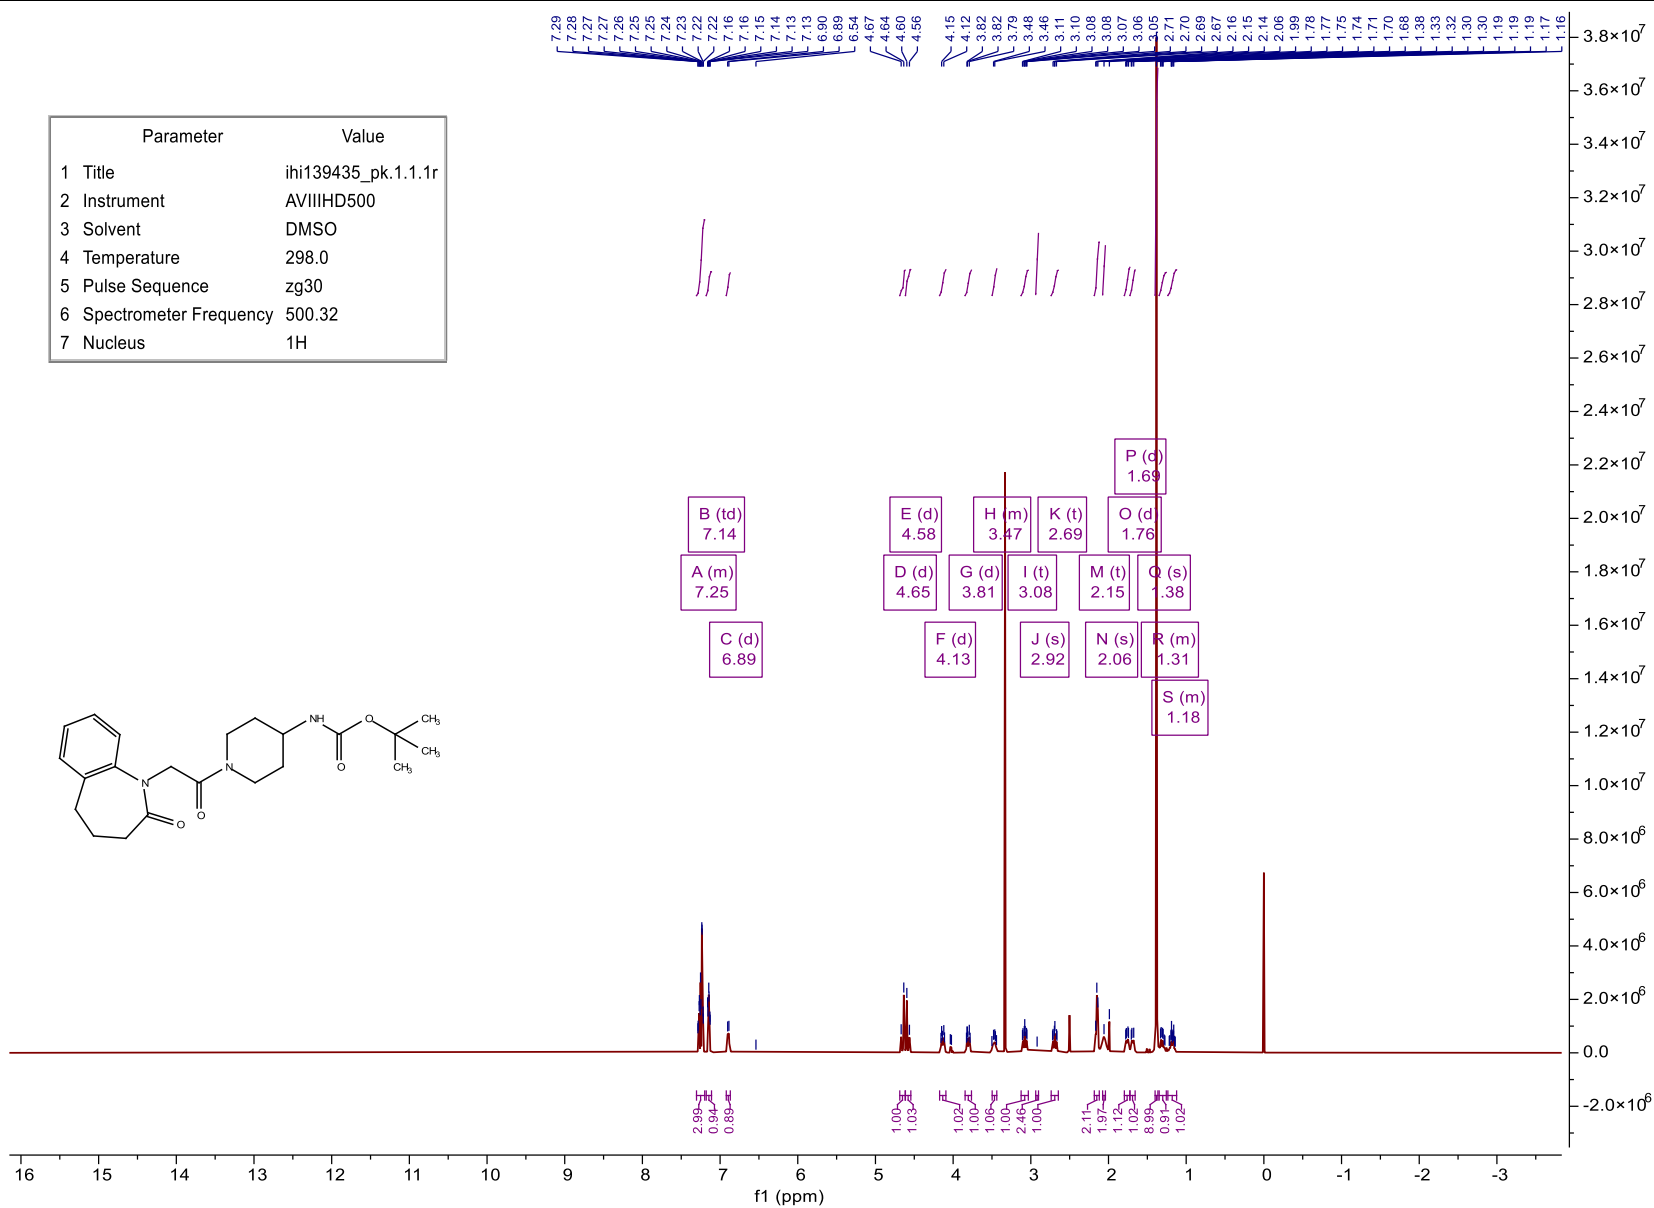

S1 File. Fig 9. <sup>1</sup>H-NMR spectrum of compound 2g.

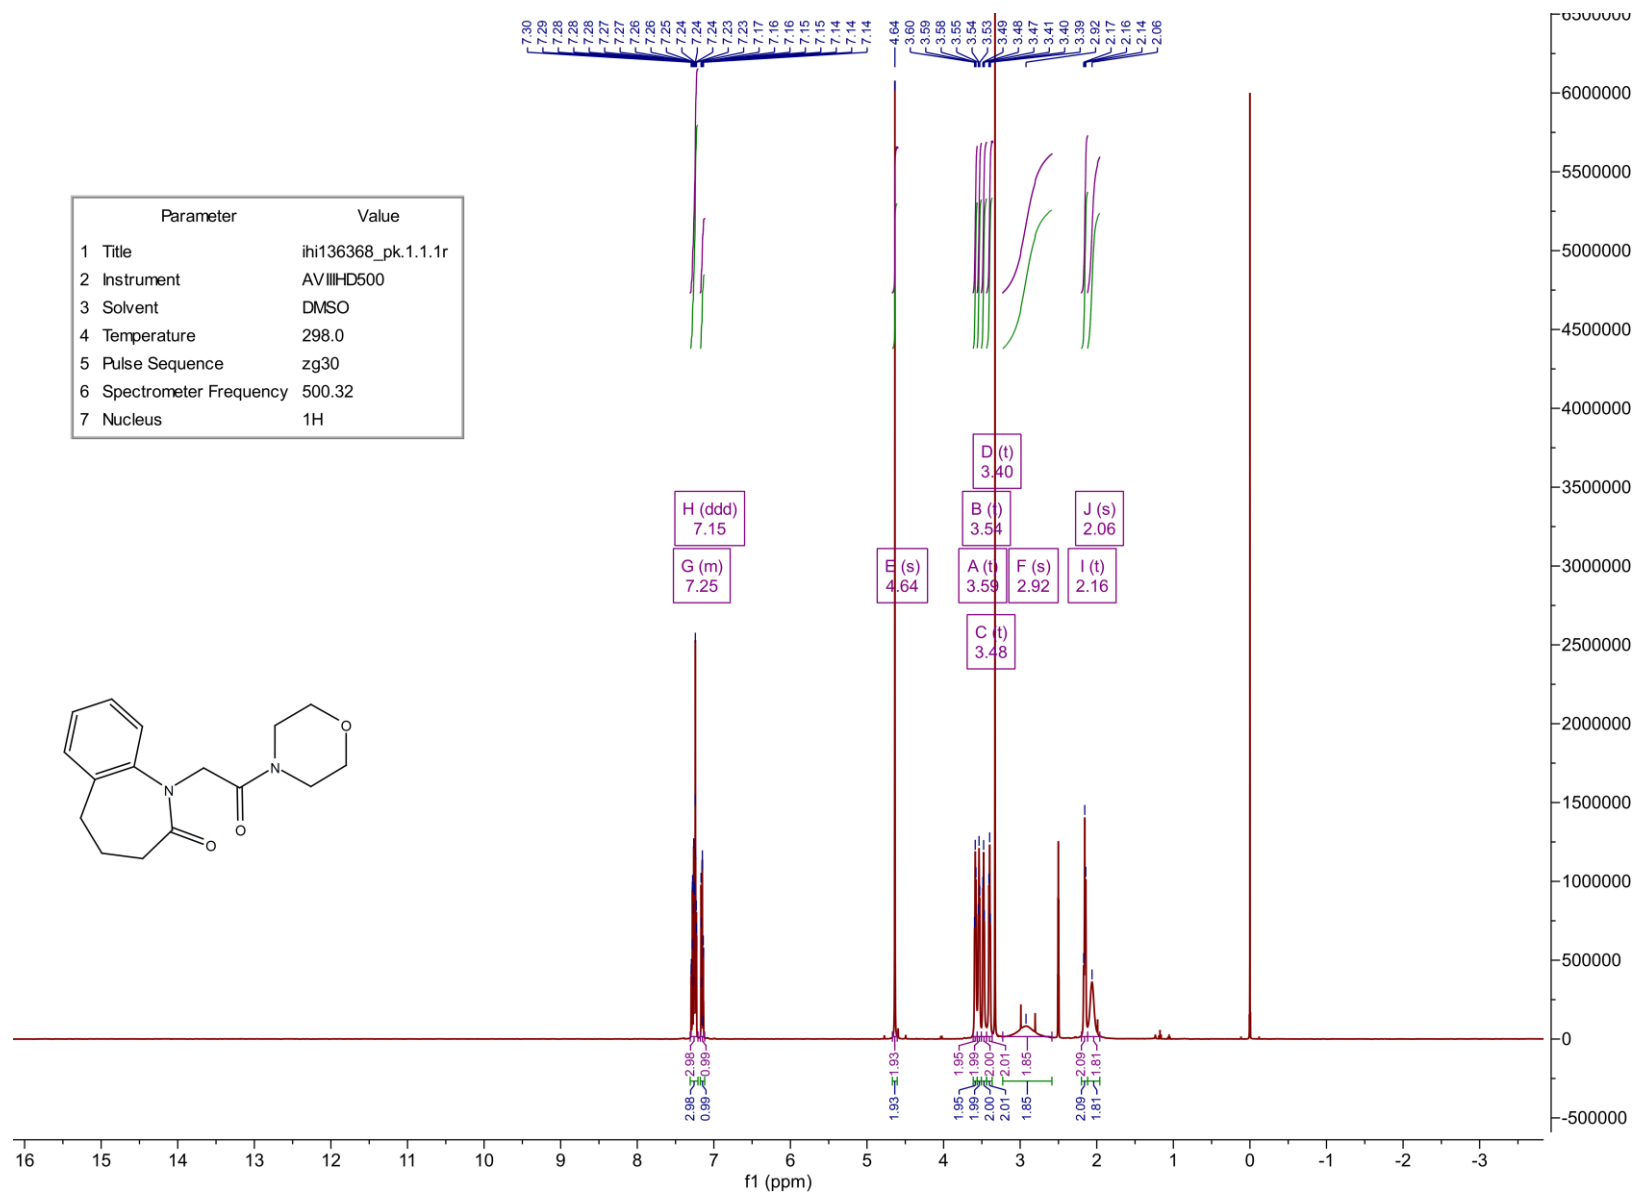

S1 File. Fig 10. <sup>1</sup>H-NMR spectrum of compound 2h.

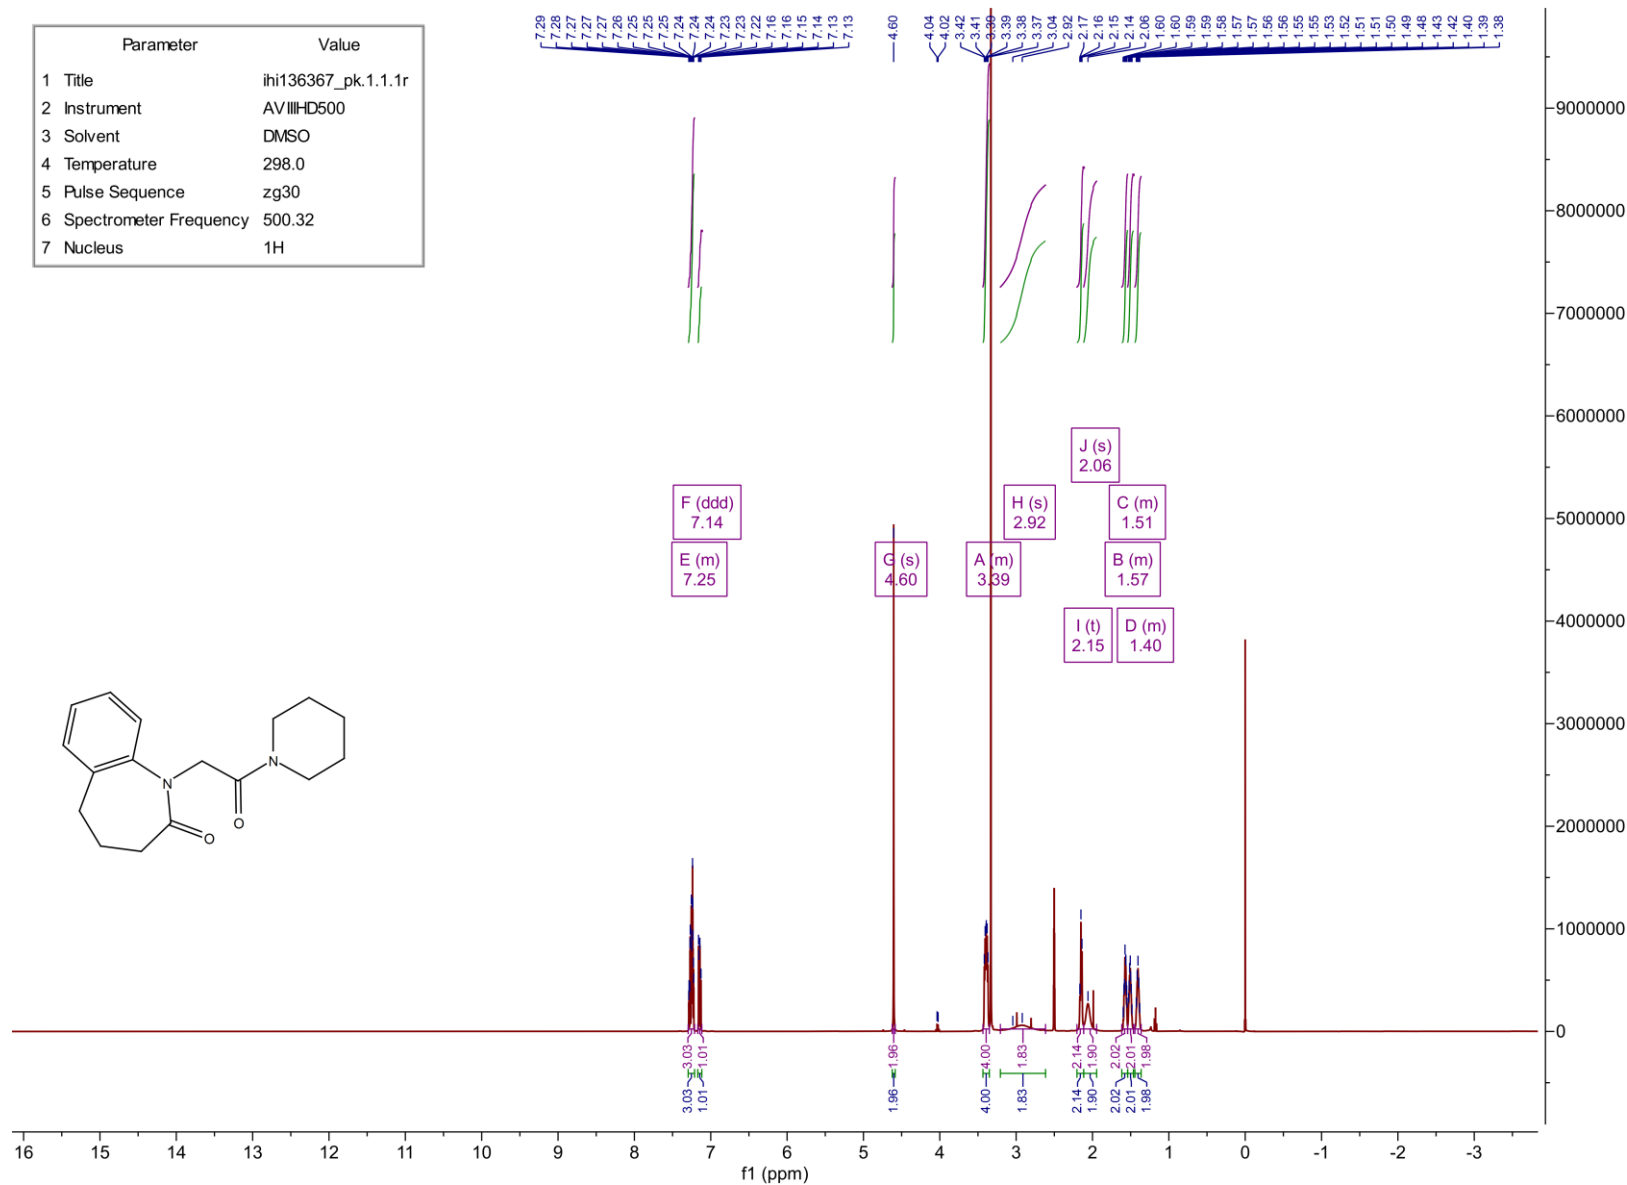

S1 File. Fig 11. <sup>1</sup>H-NMR spectrum of compound 2i.

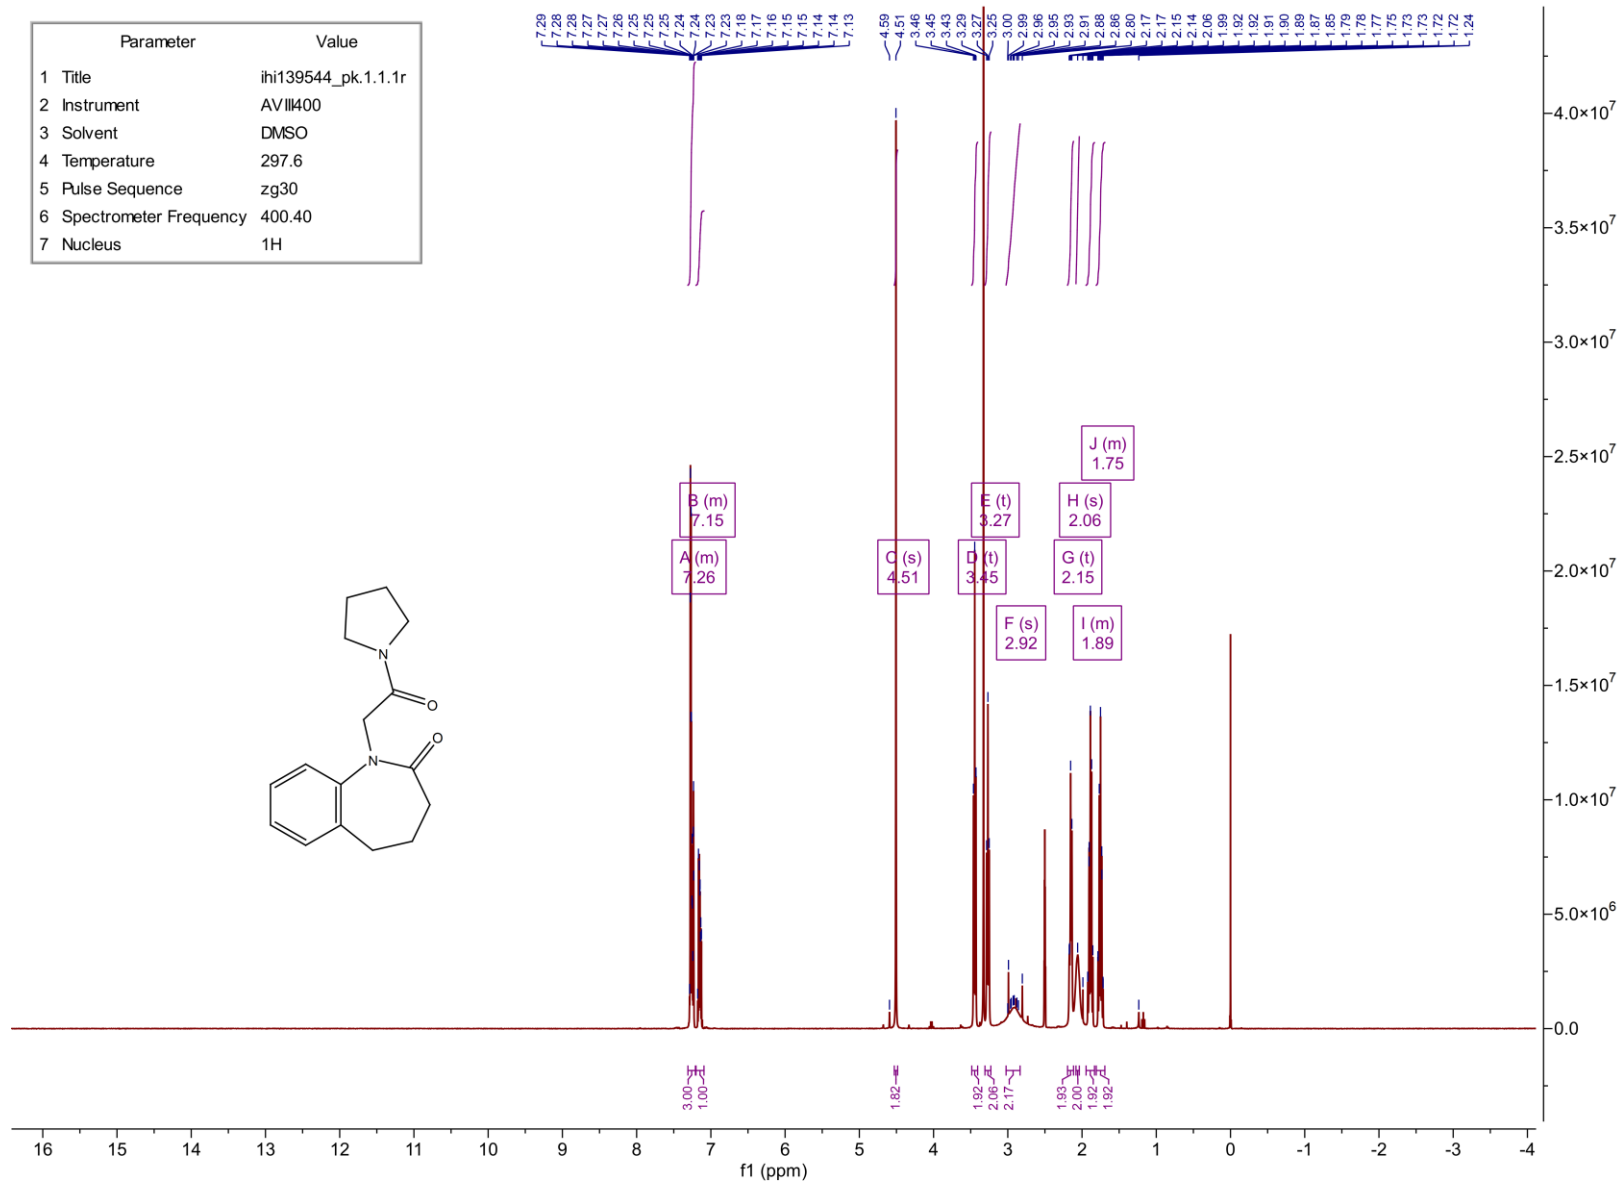S1 File. Fig 12. <sup>1</sup>H-NMR spectrum of compound 2j.

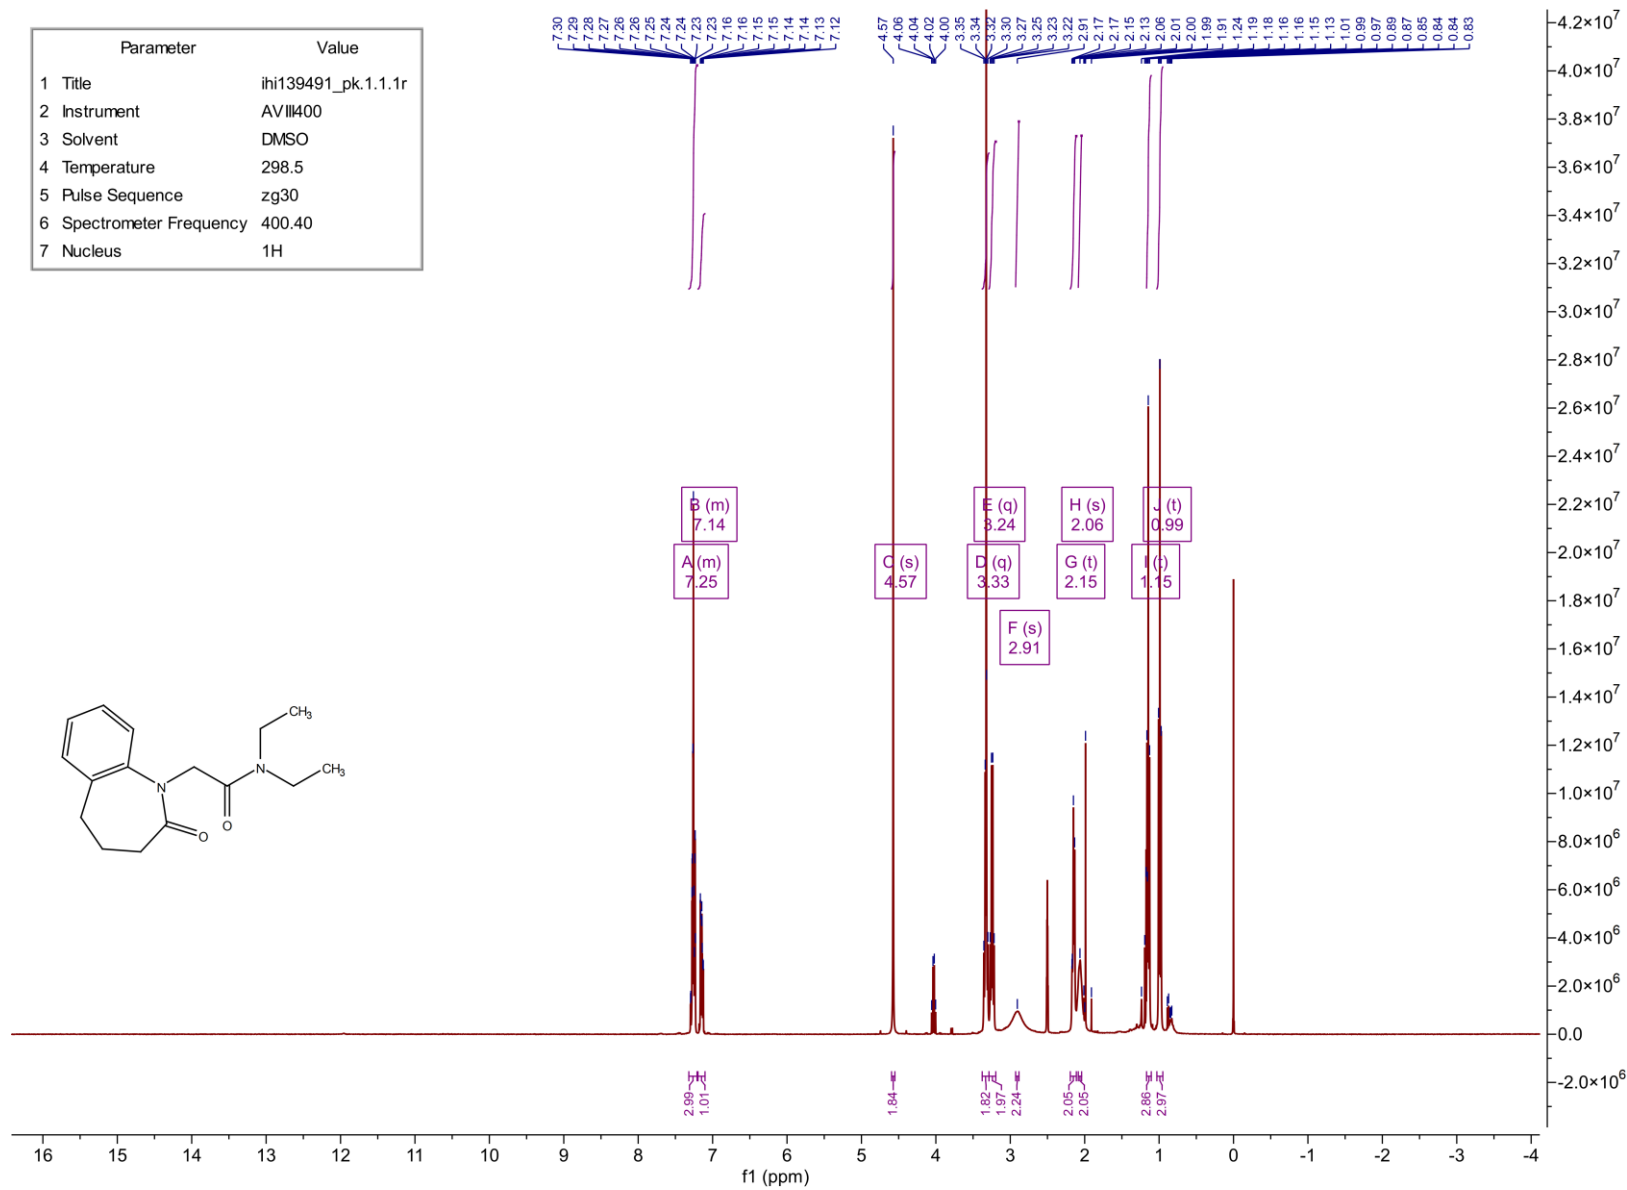S1 File. Fig 13. <sup>1</sup>H-NMR spectrum of compound 2k.

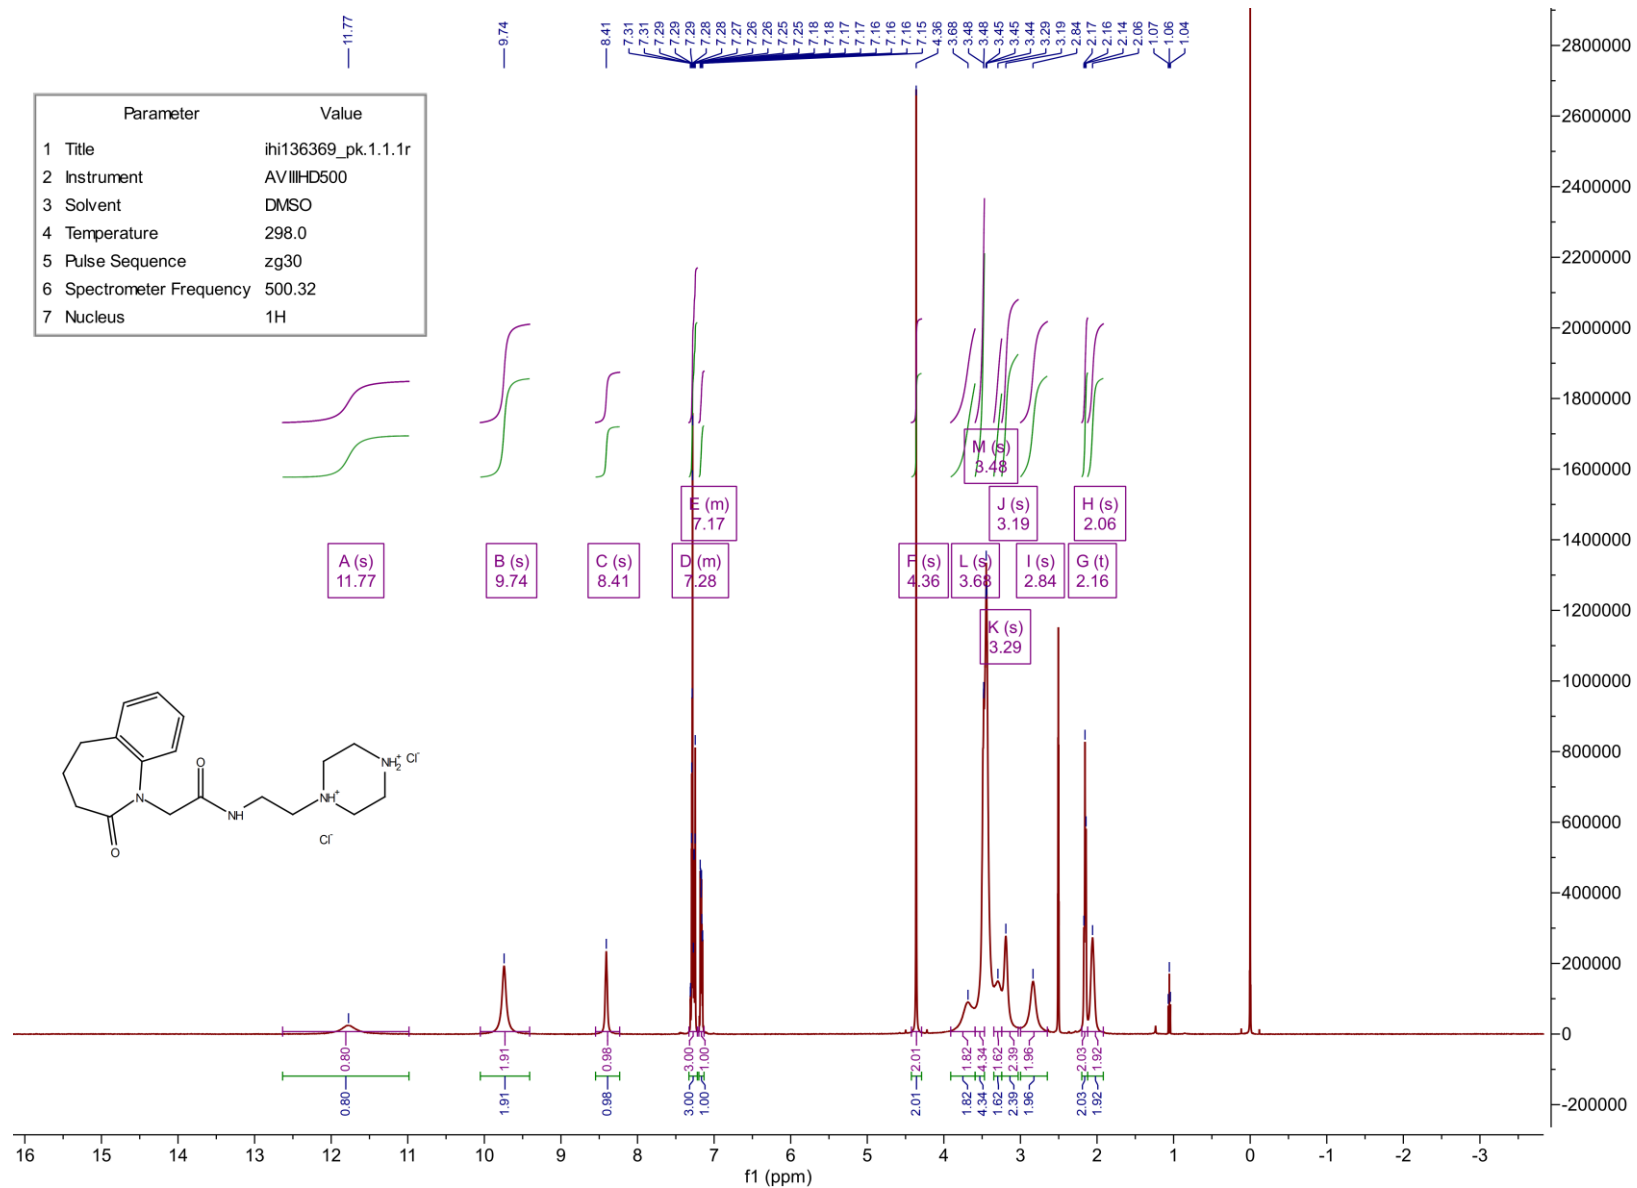

S1 File. Fig 14. <sup>1</sup>H-NMR spectrum of compound 2o.



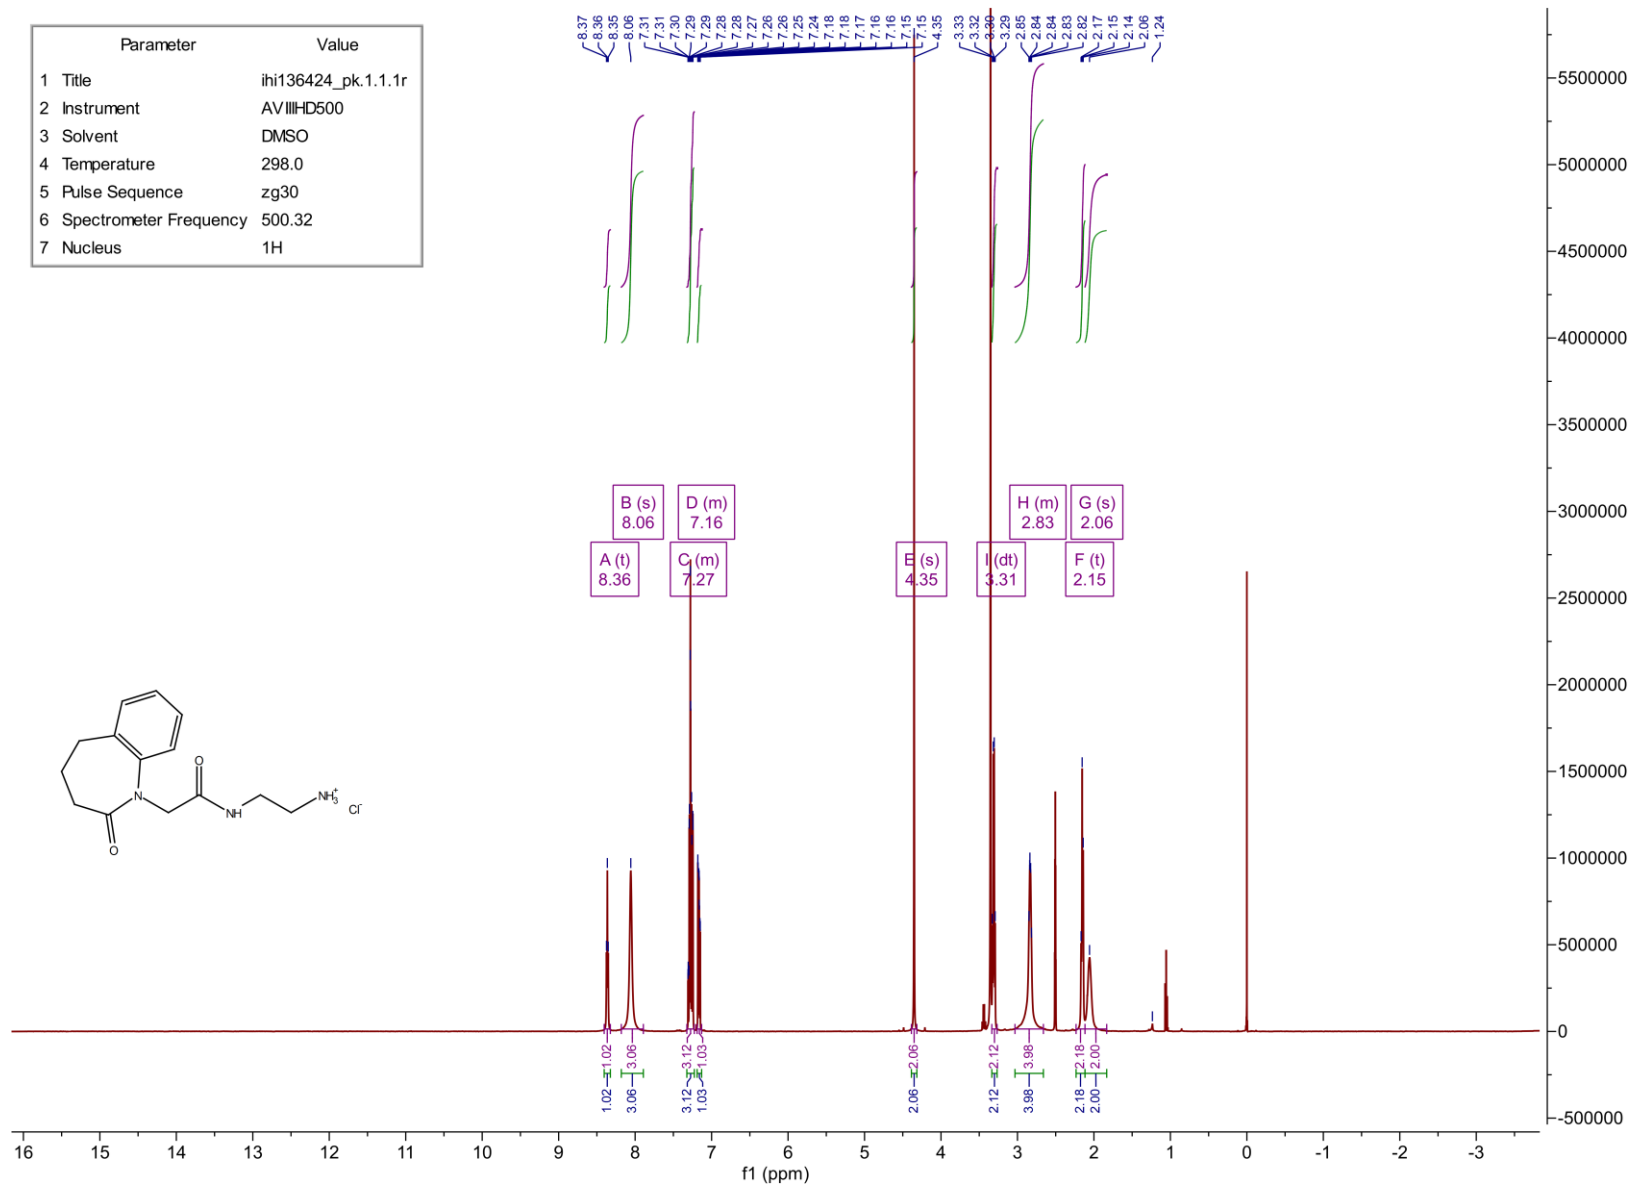S1 File. Fig 15. <sup>1</sup>H-NMR spectrum of compound 2p.

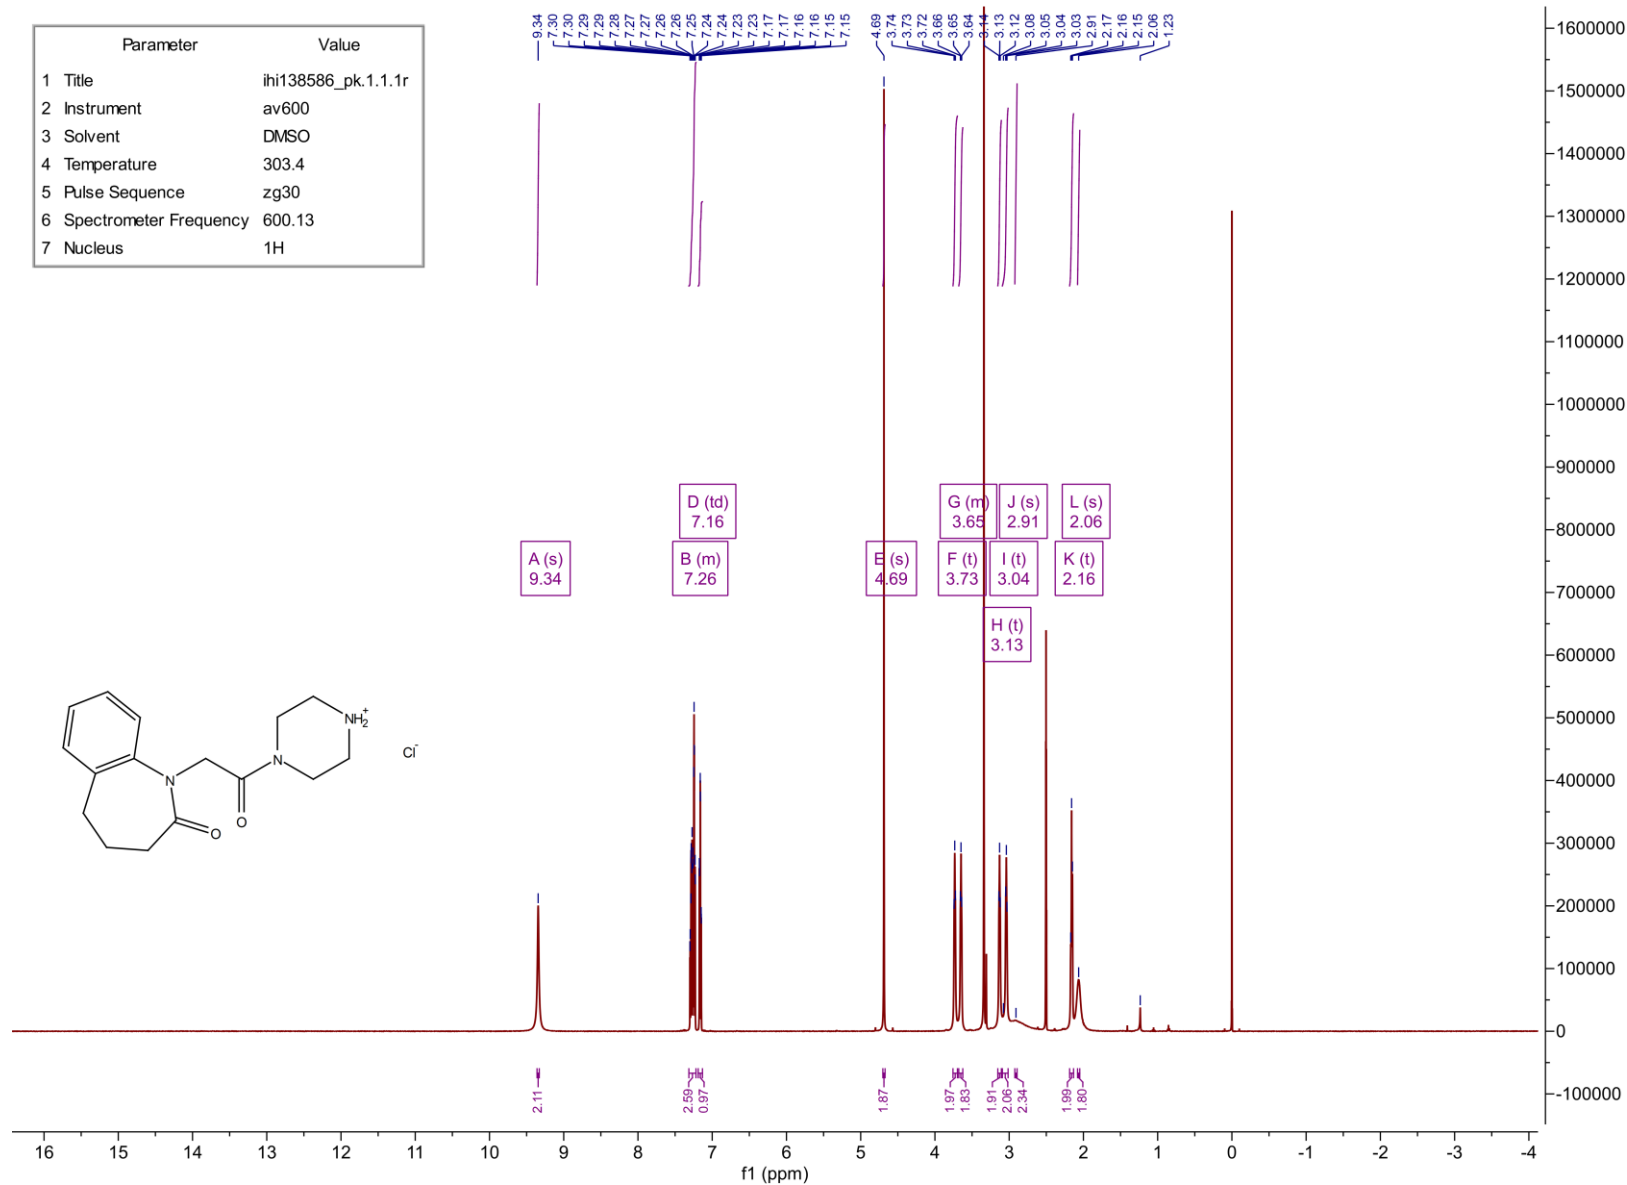

S1 File. Fig 16. <sup>1</sup>H-NMR spectrum of compound 2q.

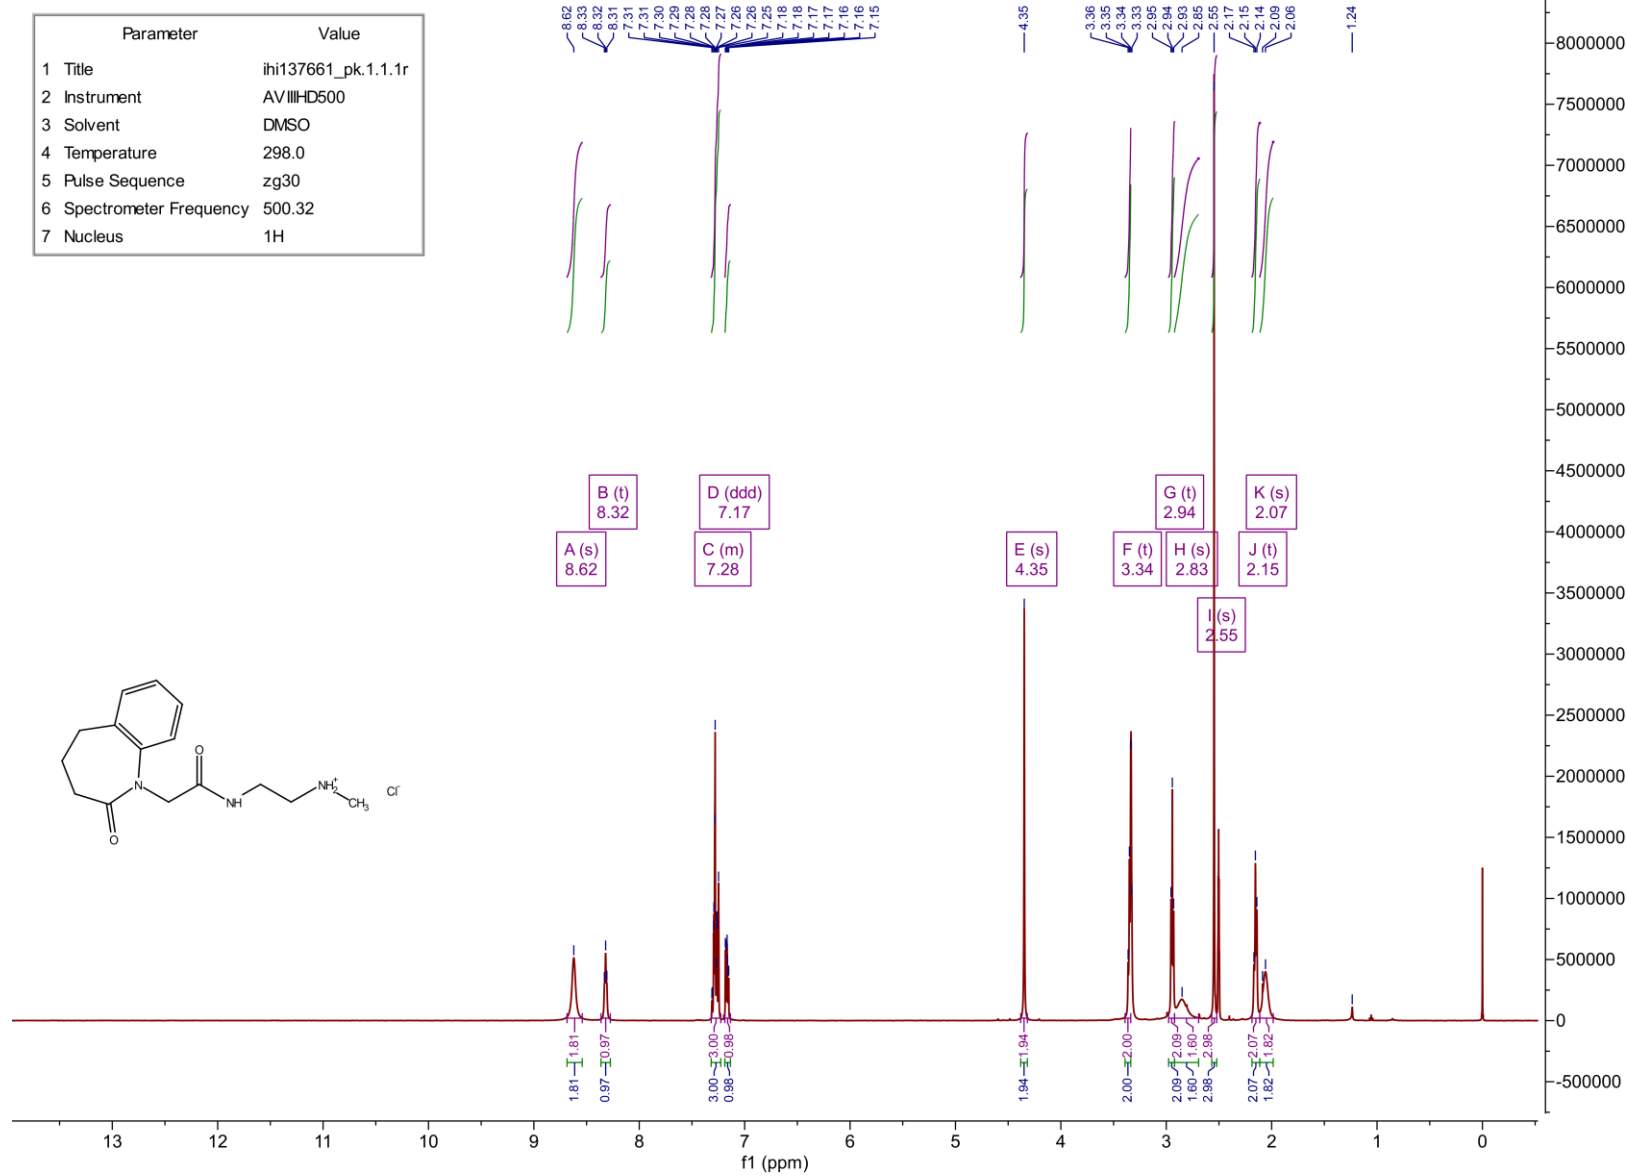S1 File. Fig 17. <sup>1</sup>H-NMR spectrum of compound 2r.

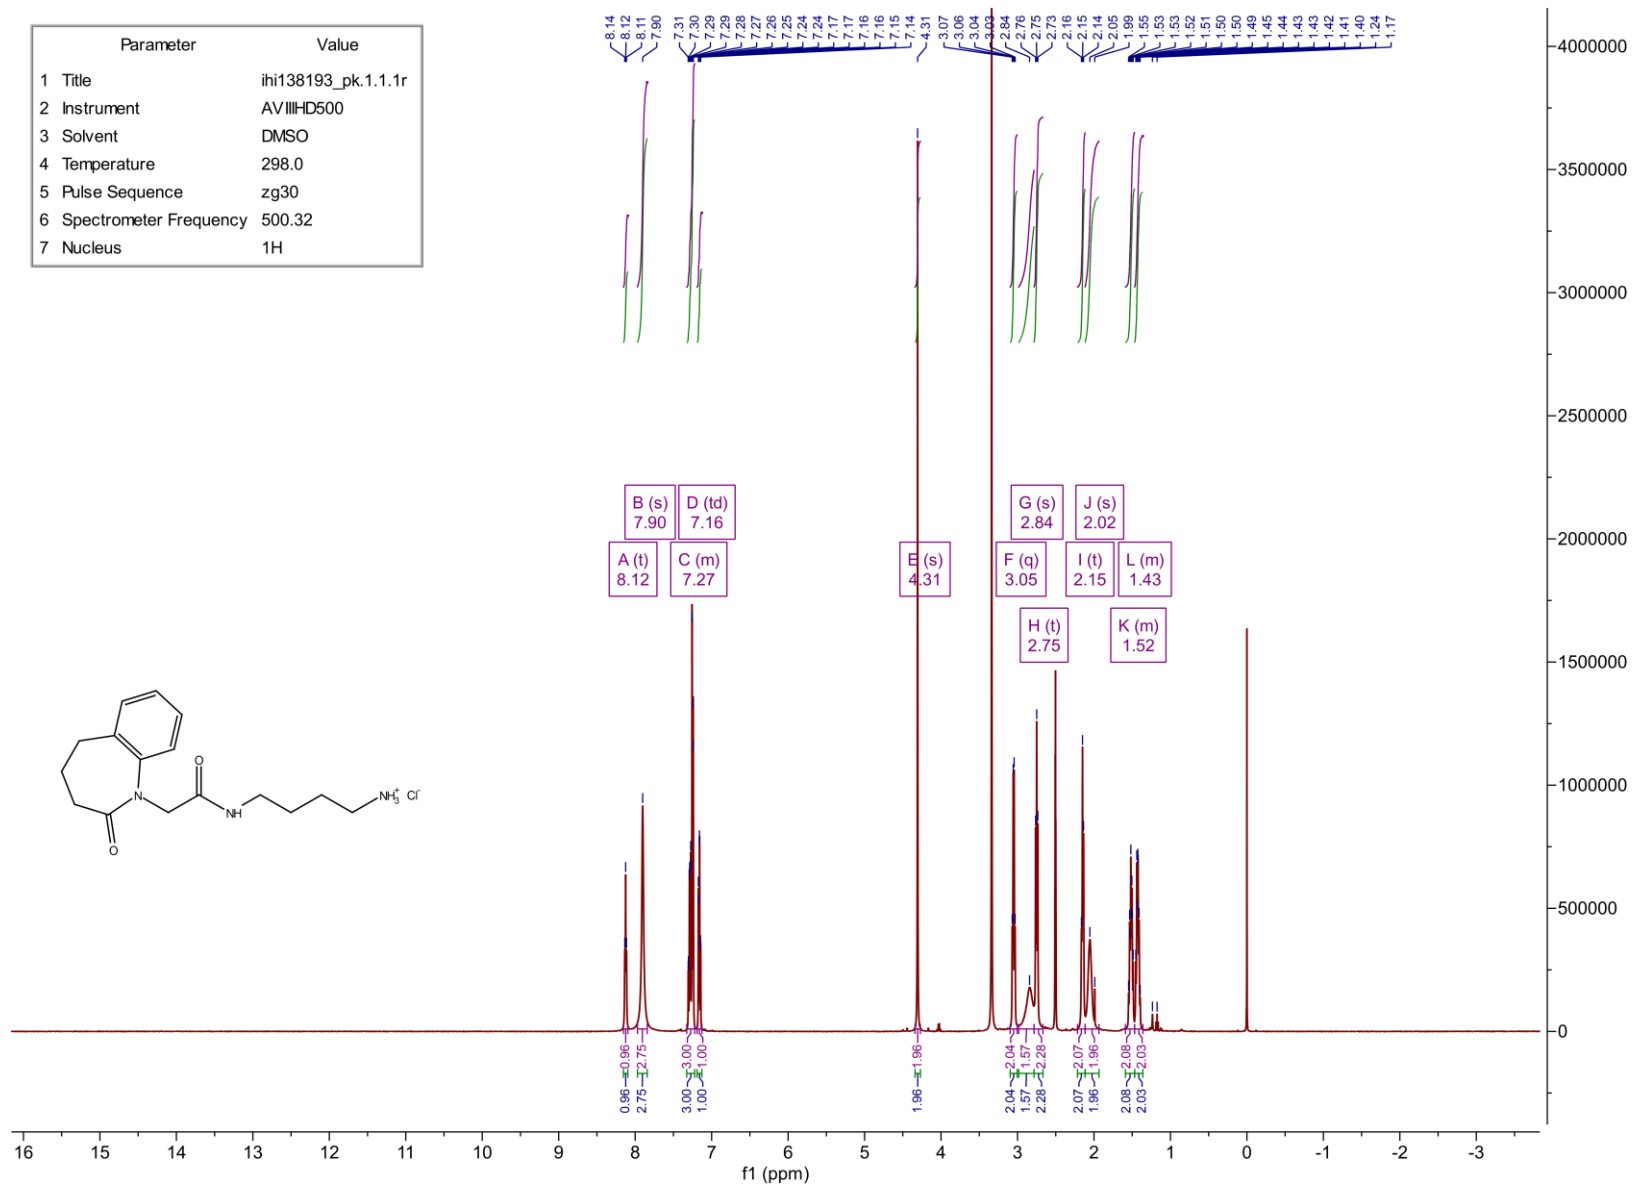S1 File. Fig 18. <sup>1</sup>H-NMR spectrum of compound 2s.

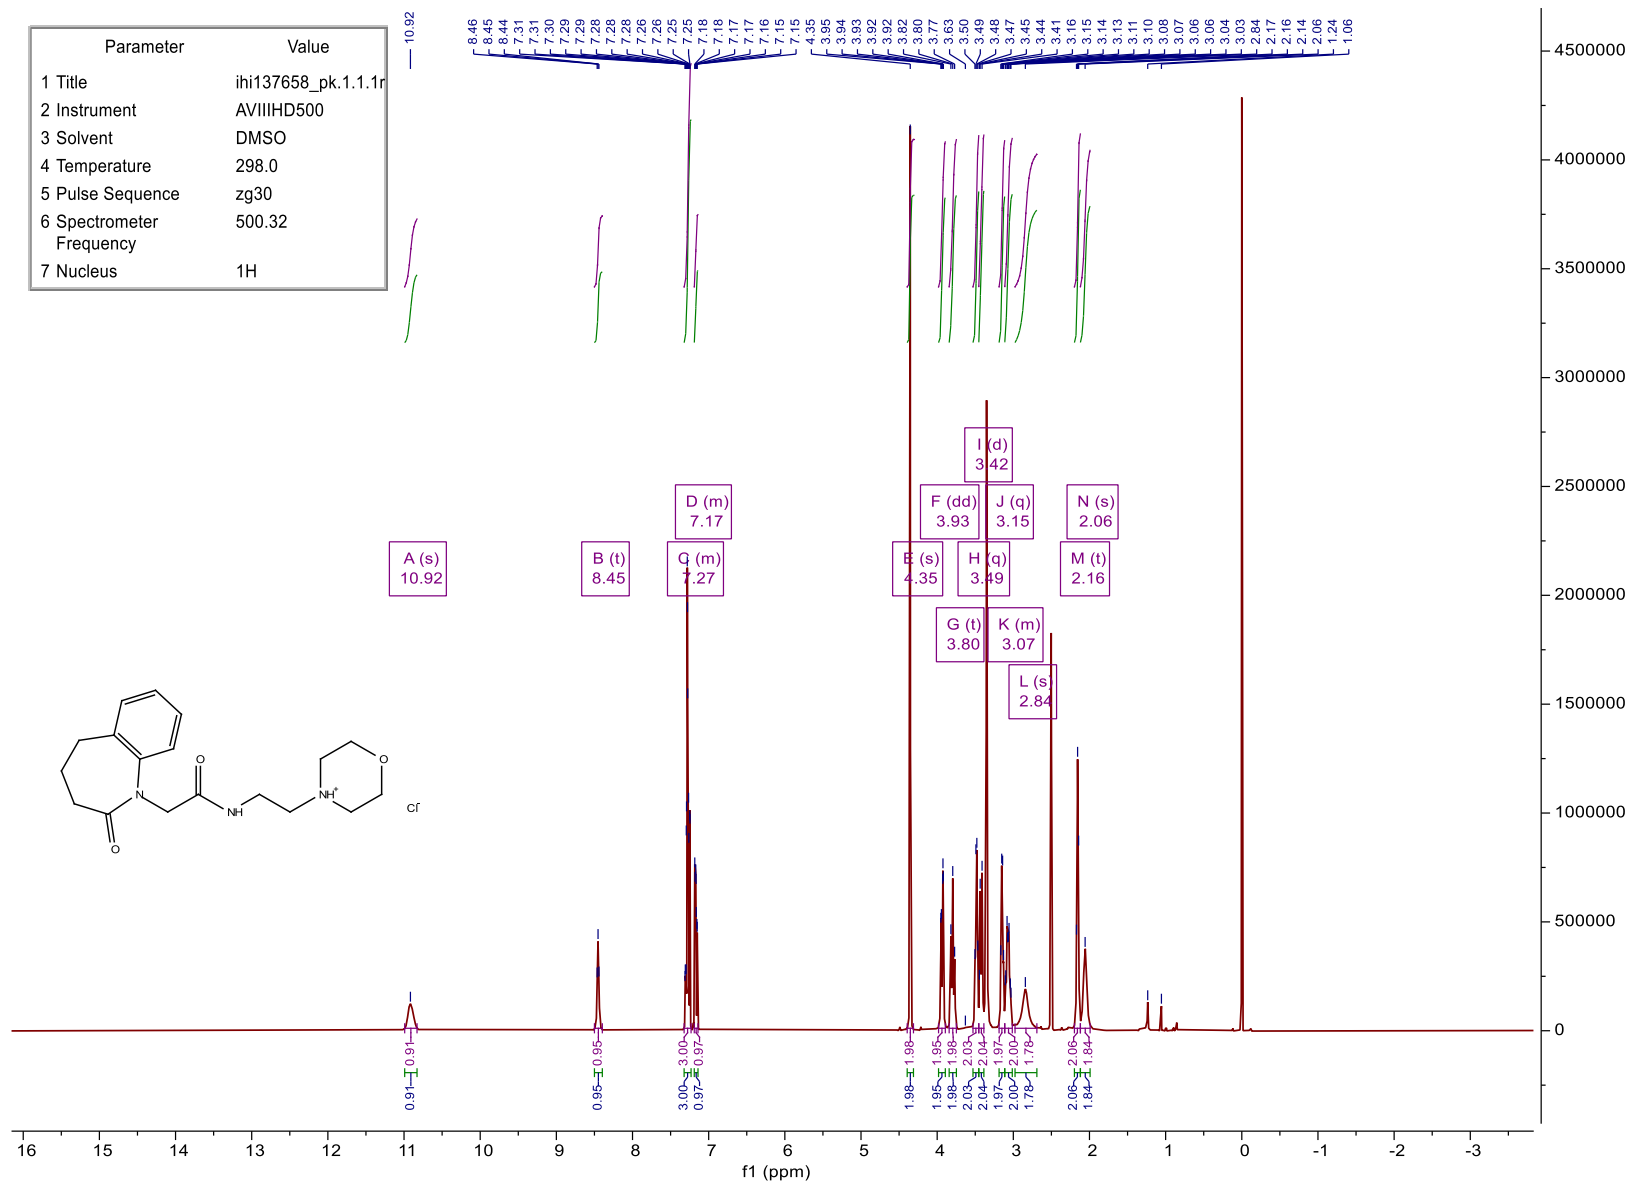

S1 File. Fig 19. <sup>1</sup>H-NMR spectrum of compound 2t.

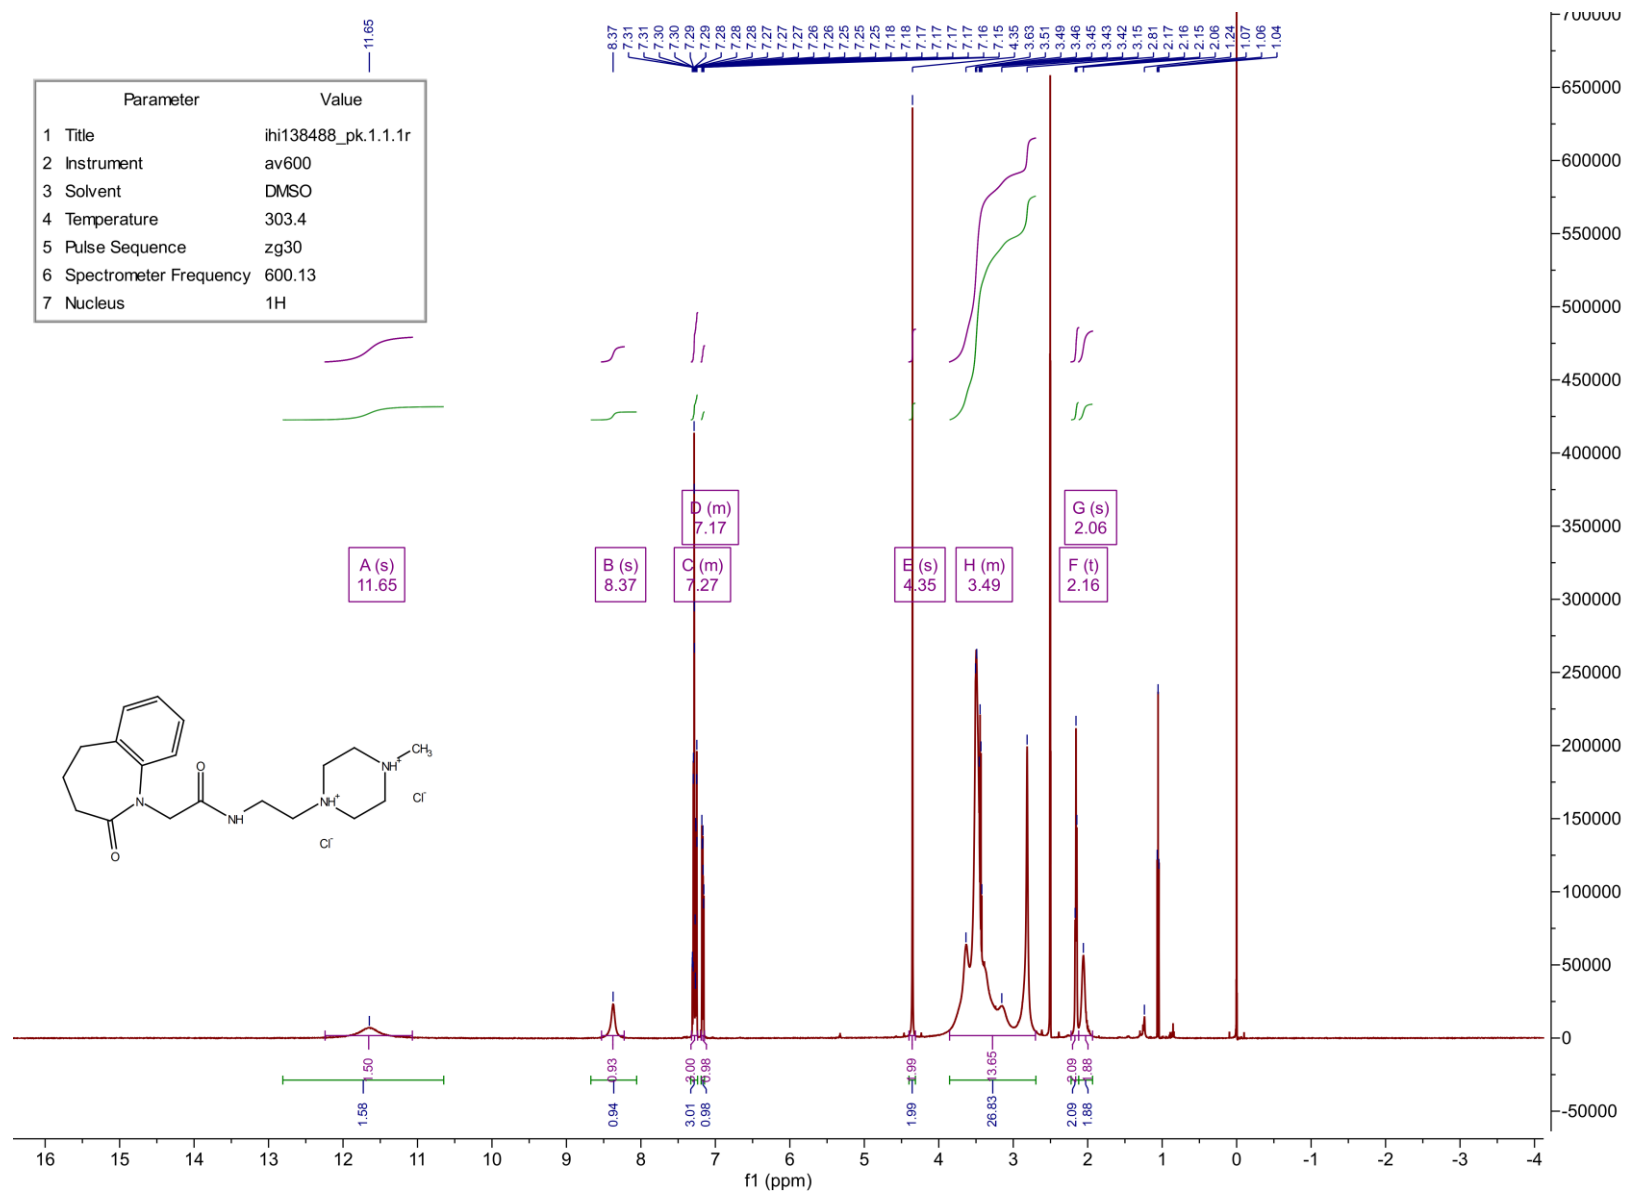S1 File. Fig 20. <sup>1</sup>H-NMR spectrum of compound 2u.

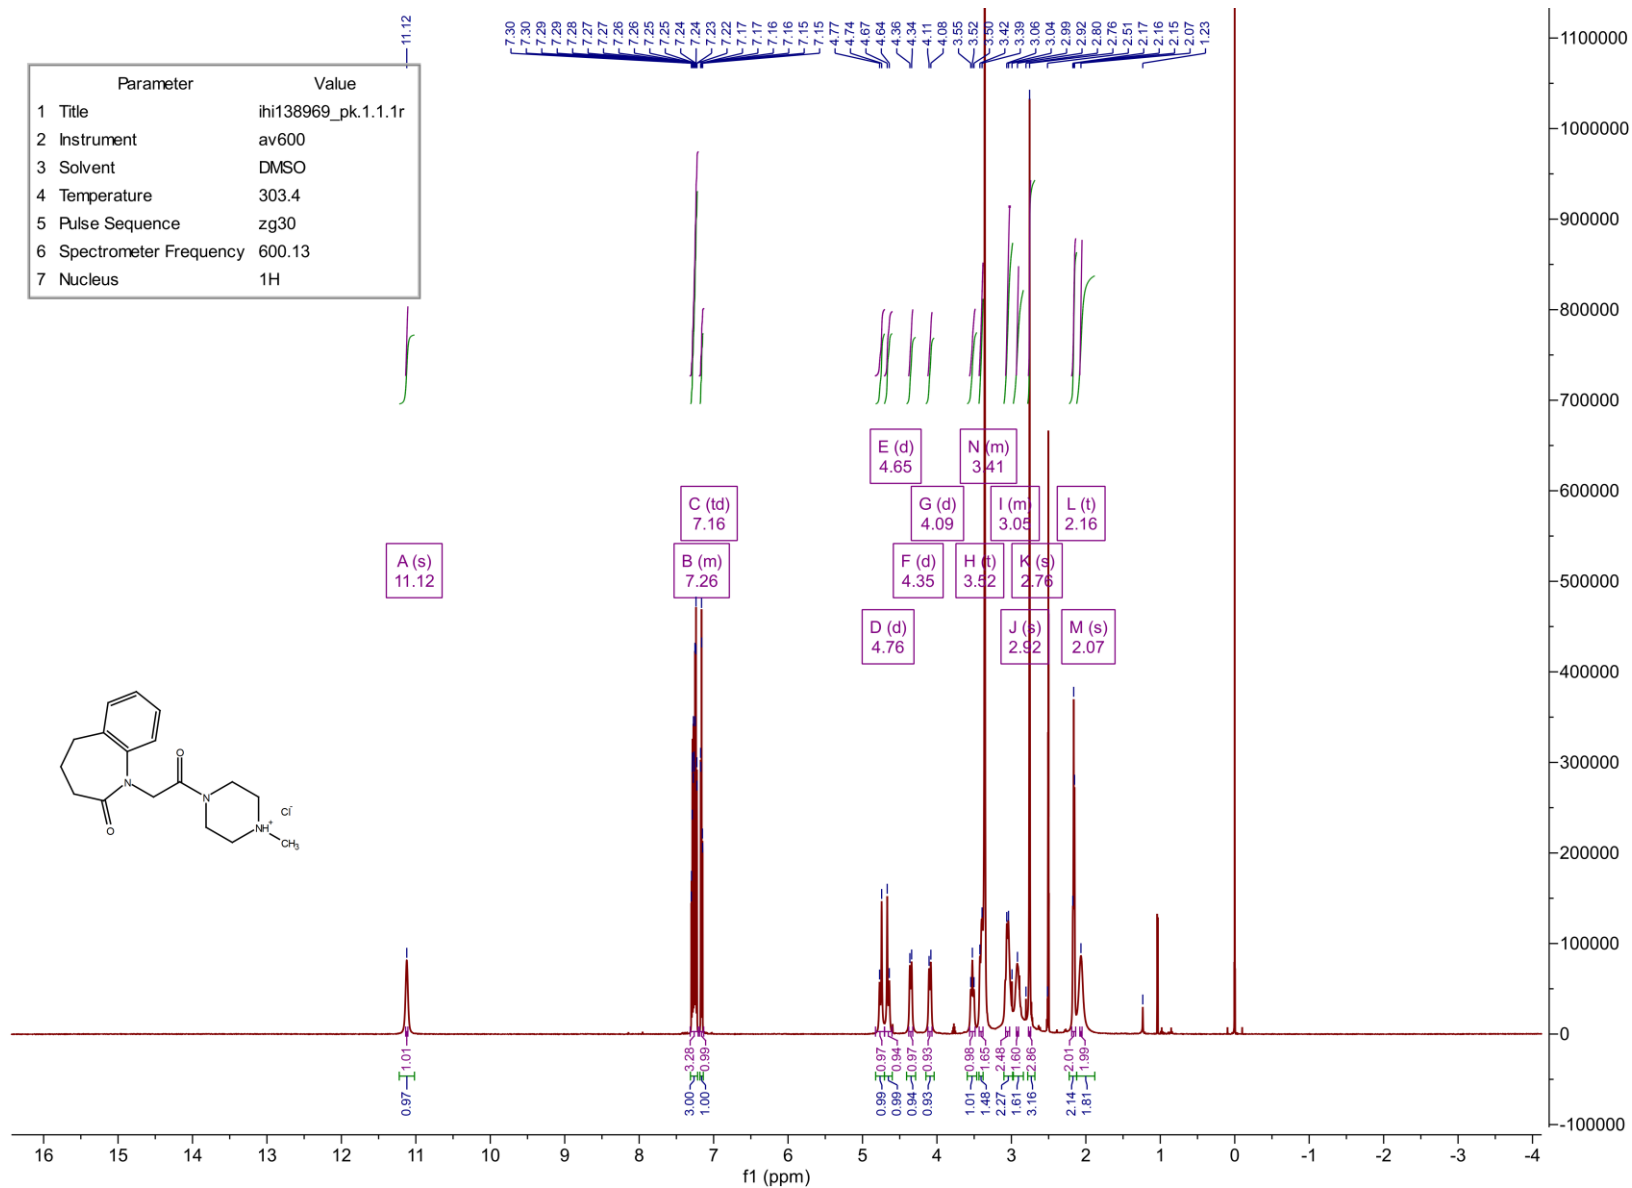

S1 File. Fig 21. <sup>1</sup>H-NMR spectrum of compound 2v.

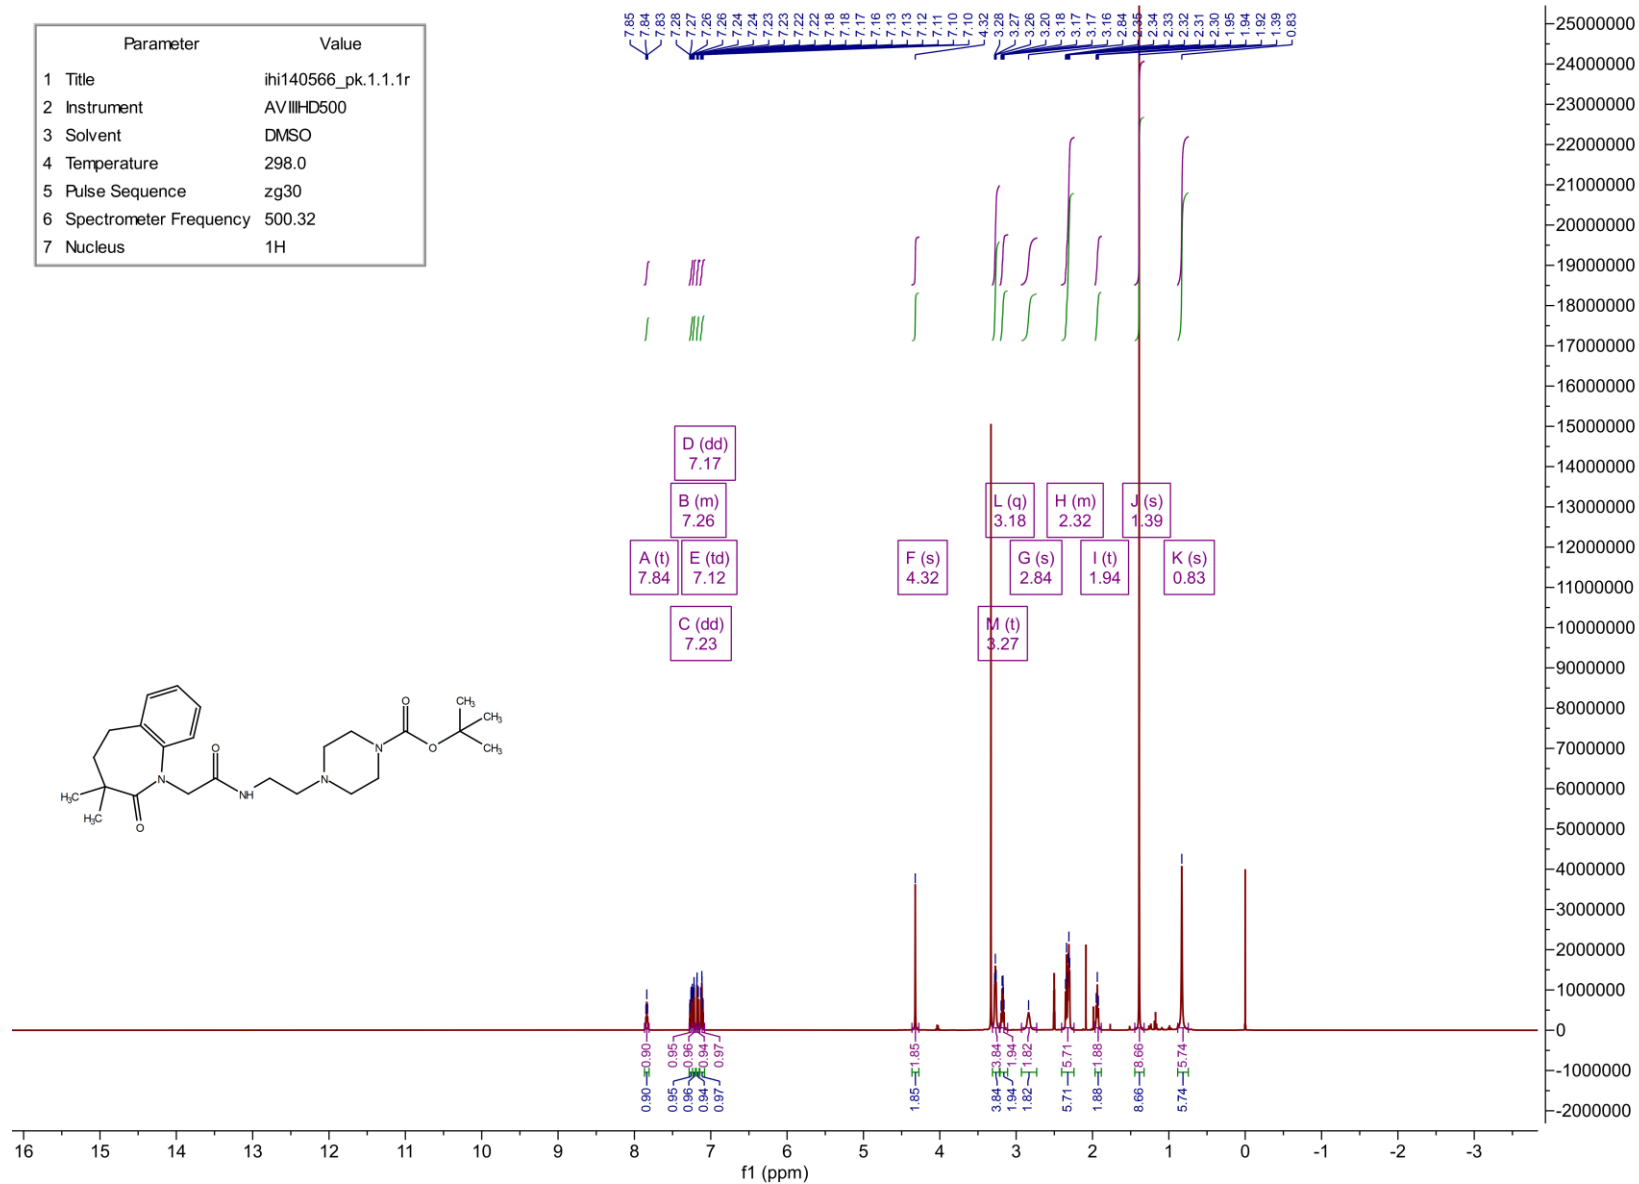

S1 File. Fig 22 <sup>1</sup>H-NMR spectrum of compound 3b.



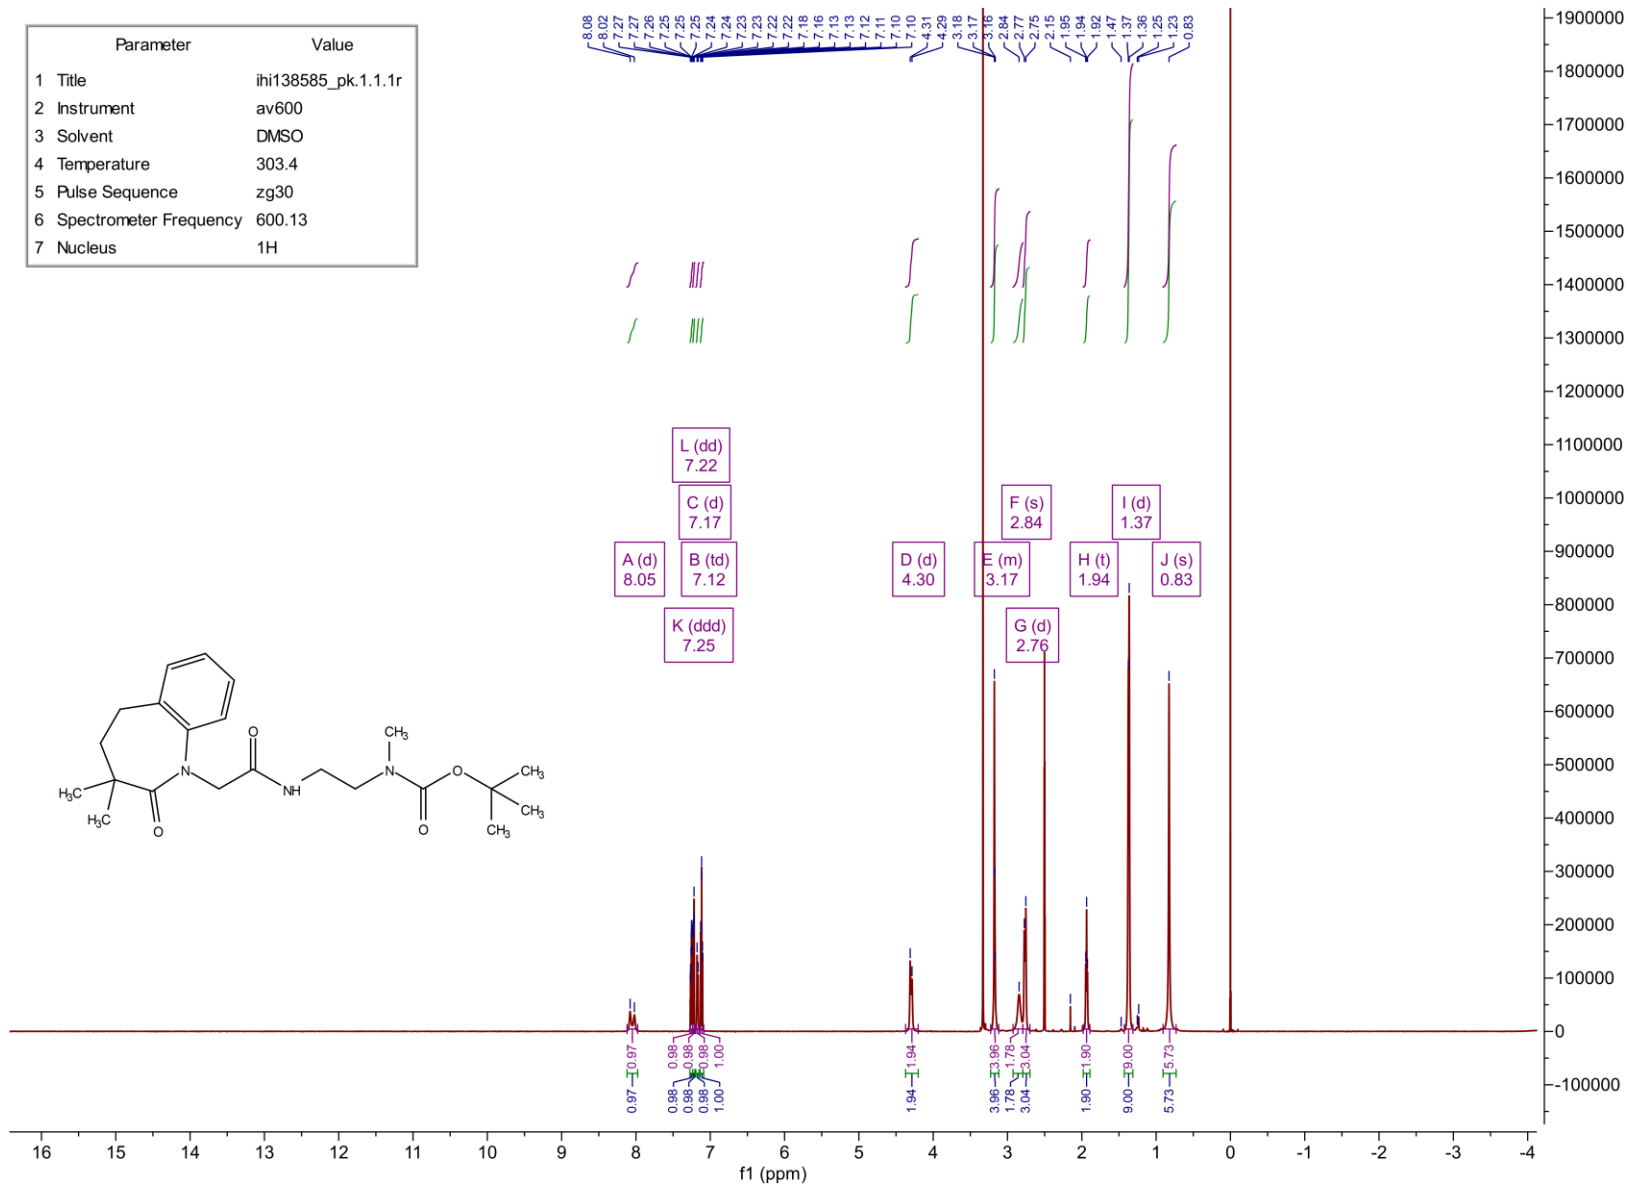S1 File. Fig 23. <sup>1</sup>H-NMR spectrum of compound 3c.

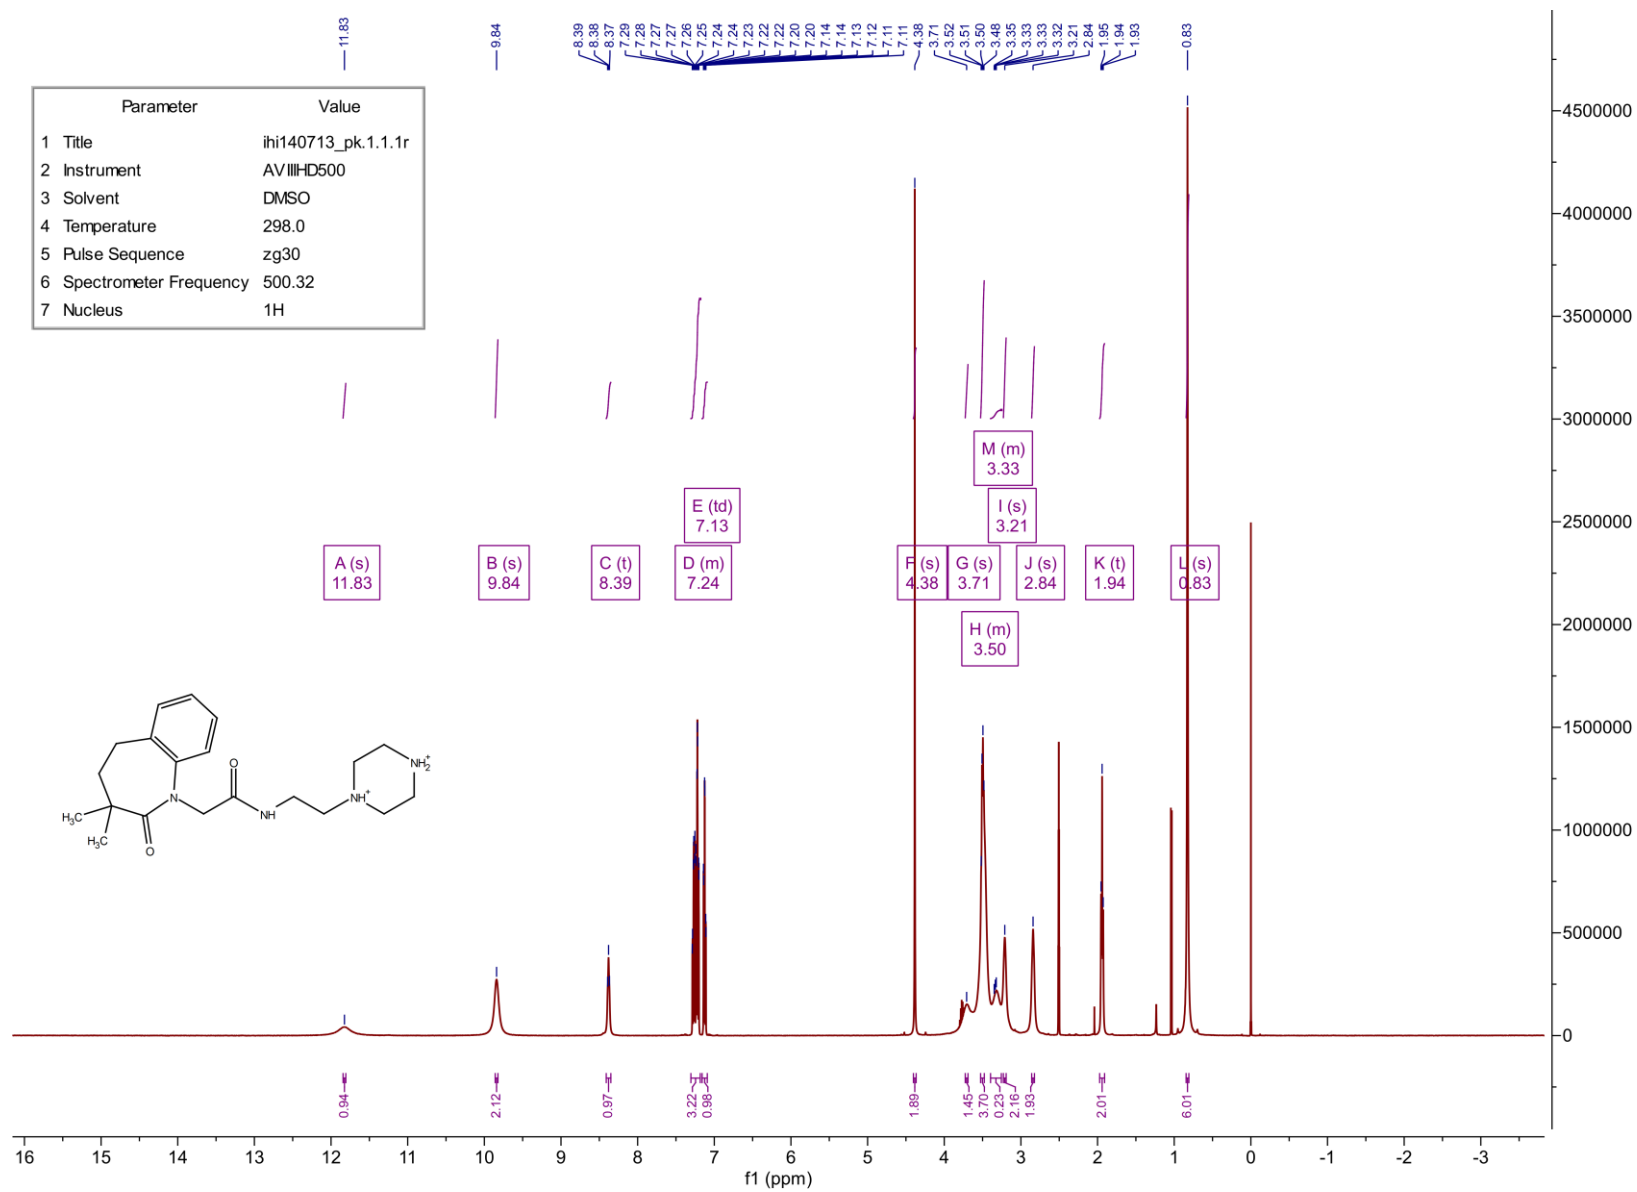S1 File. Fig 24. <sup>1</sup>H-NMR spectrum of compound 3d.

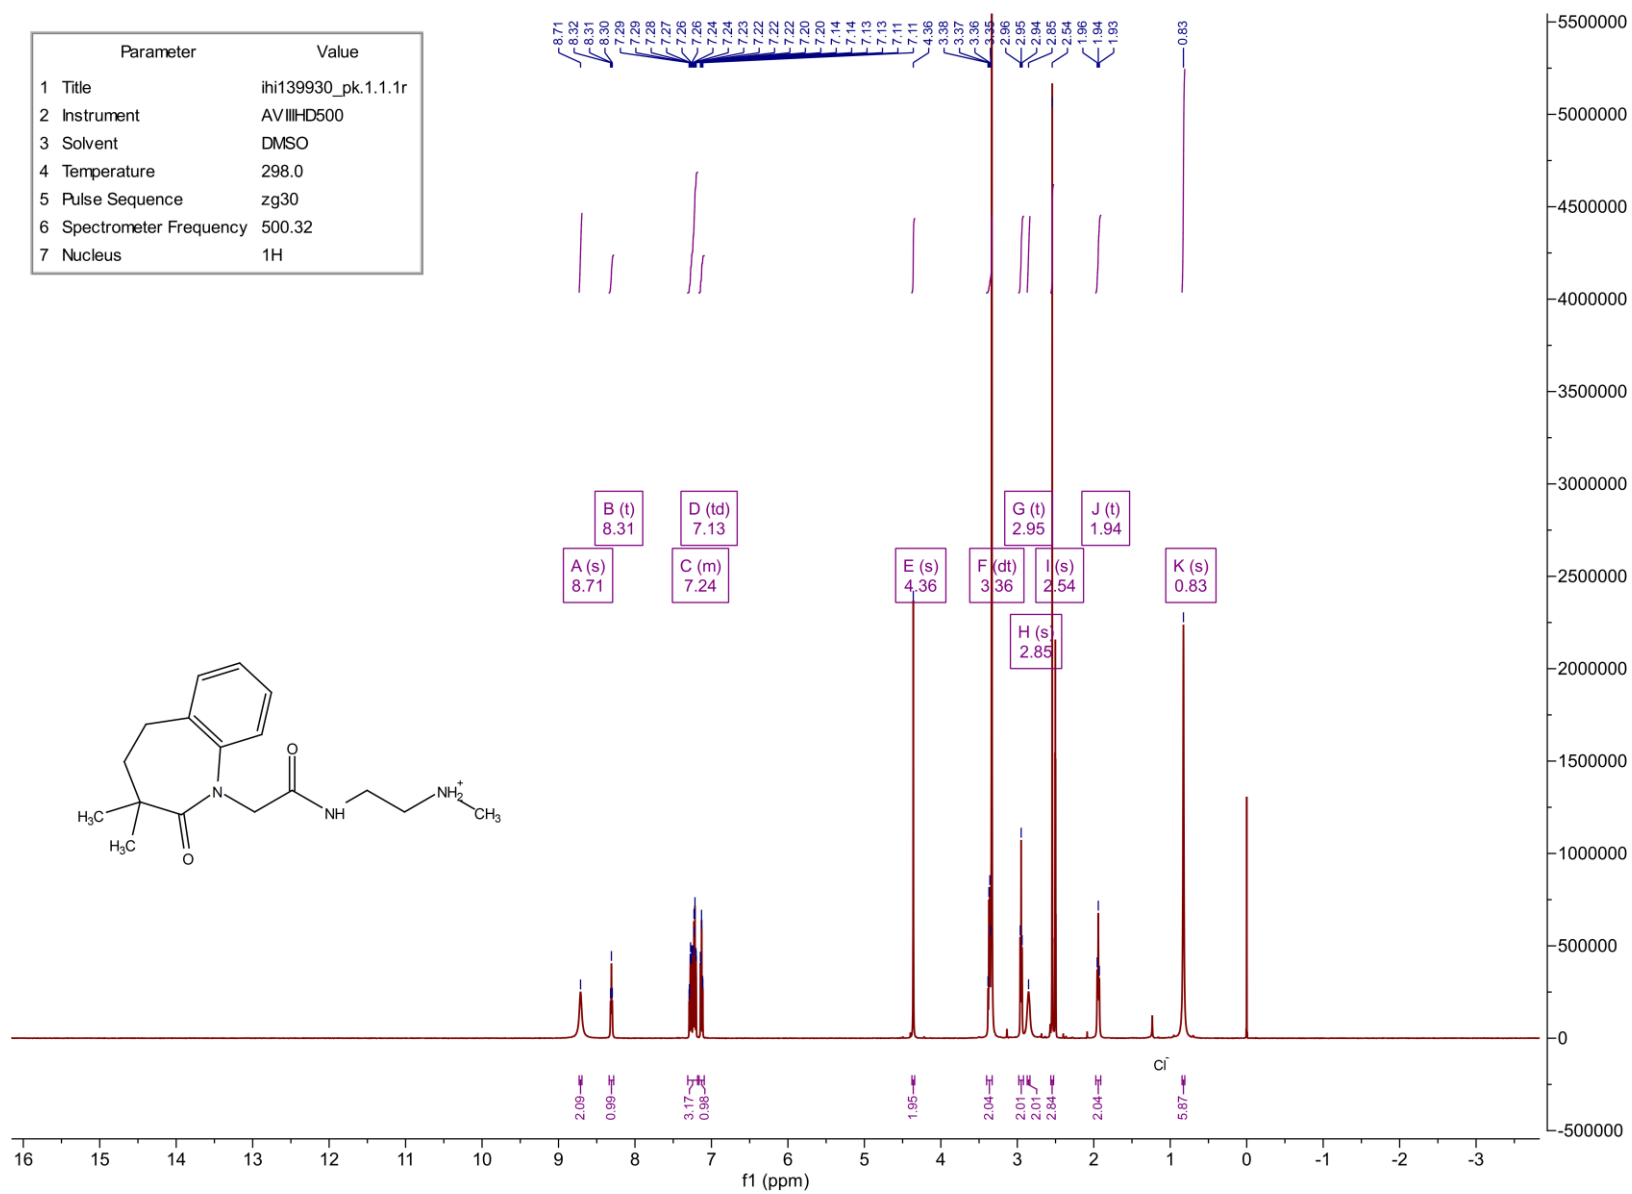S1 File. Fig 25. <sup>1</sup>H-NMR spectrum of compound 3e.

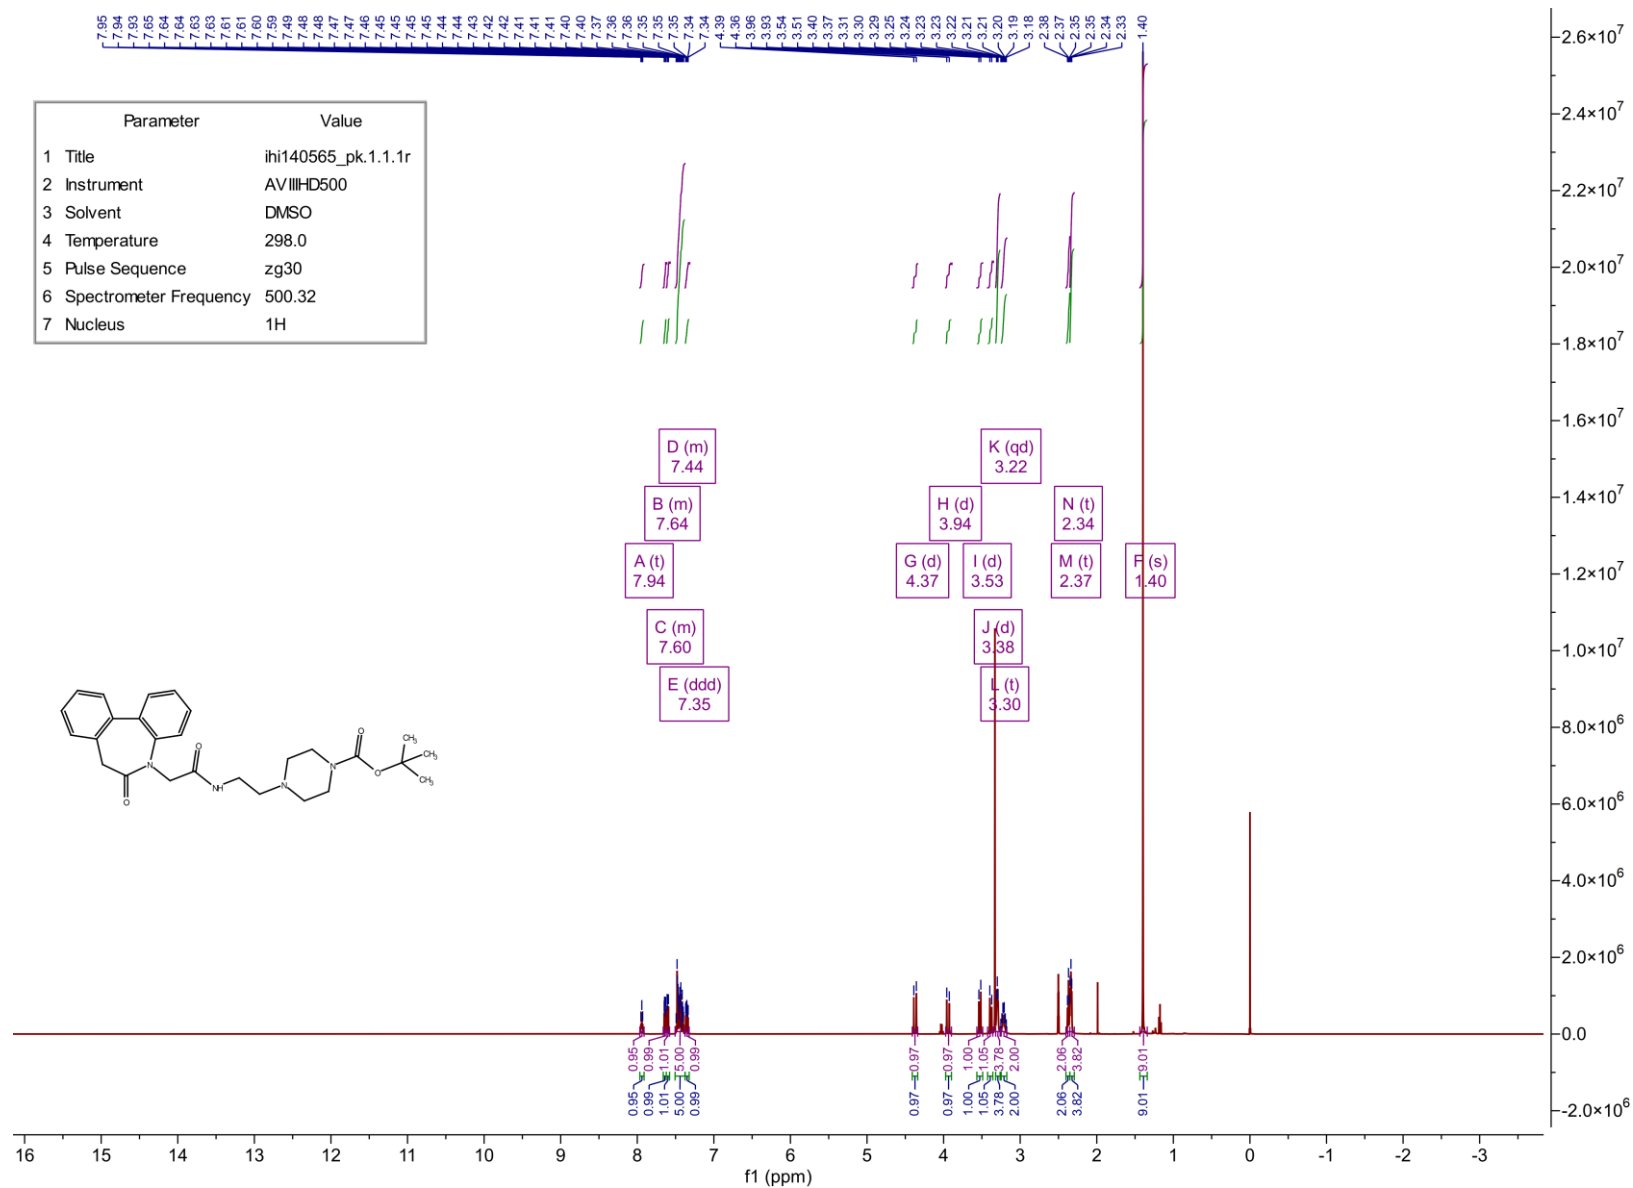

S1 File. Fig 26. <sup>1</sup>H-NMR spectrum of compound 4b.

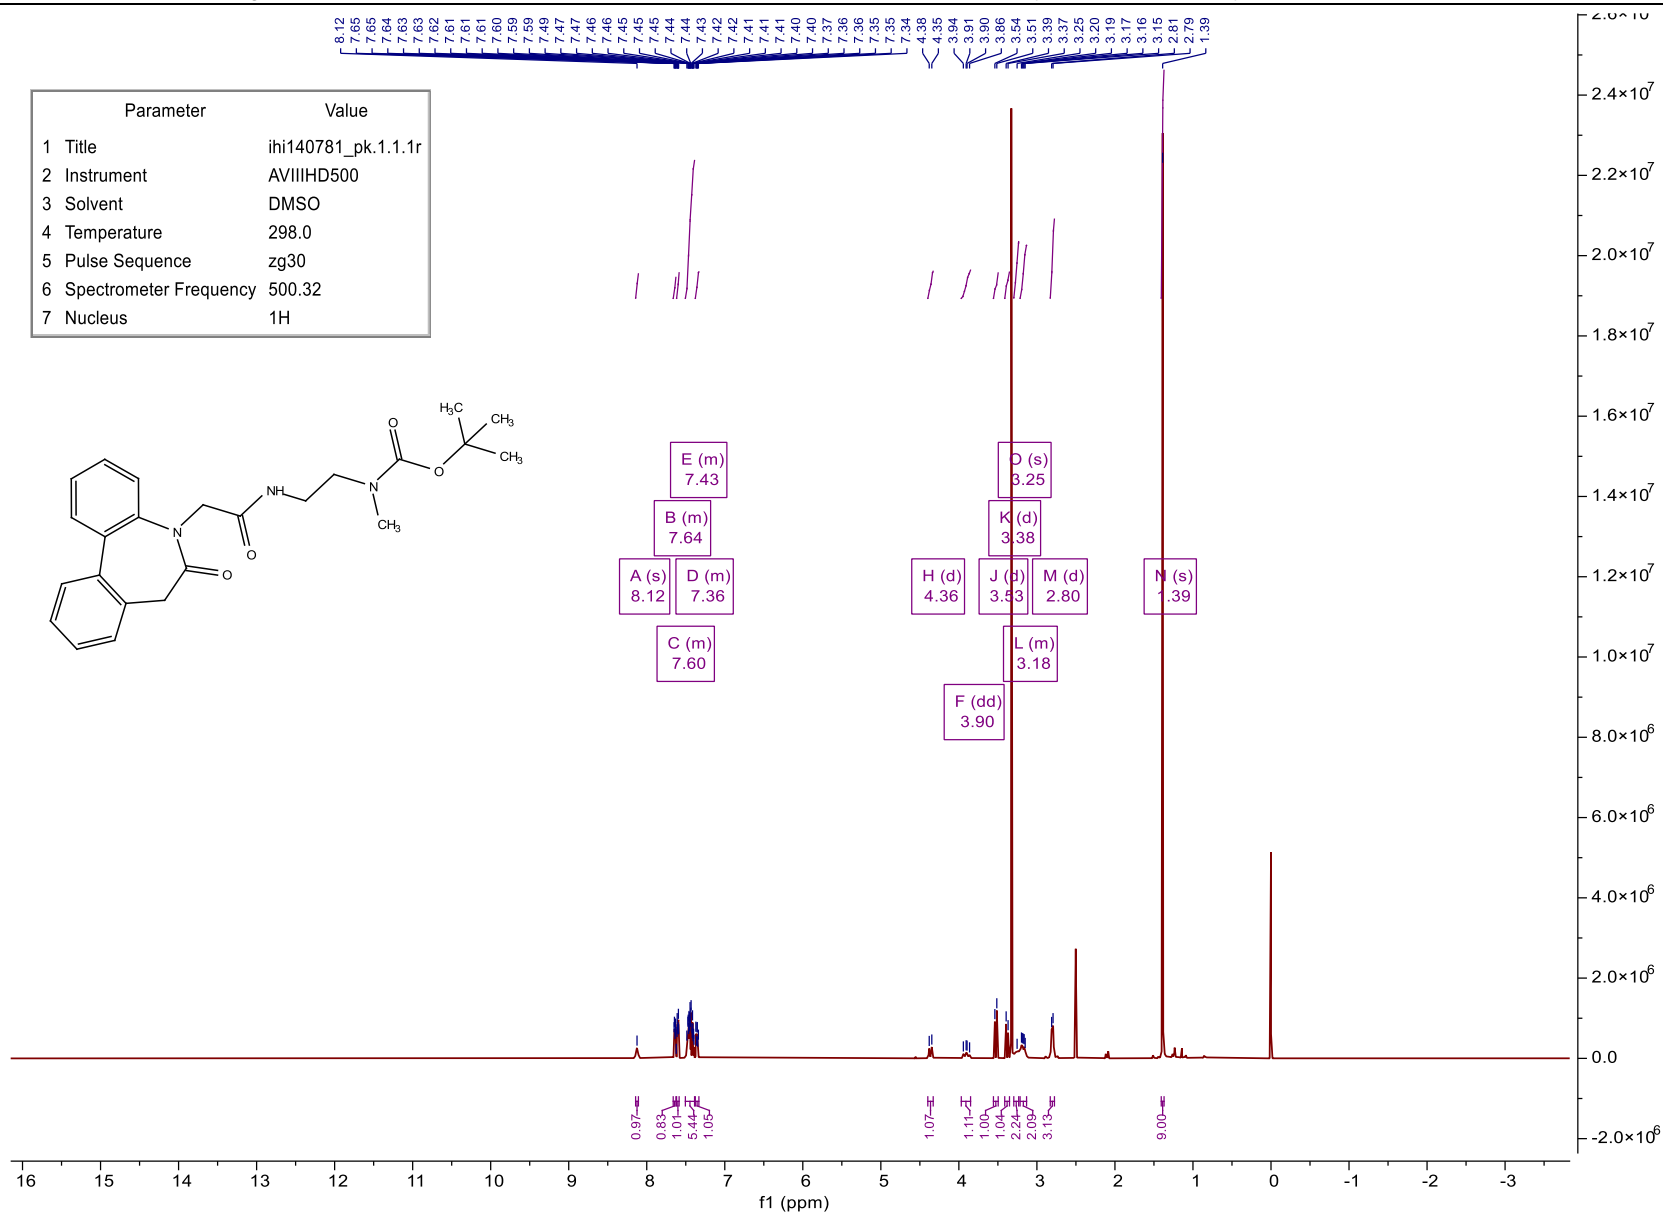

S1 File. Fig 27. <sup>1</sup>H-NMR spectrum of compound 4c.

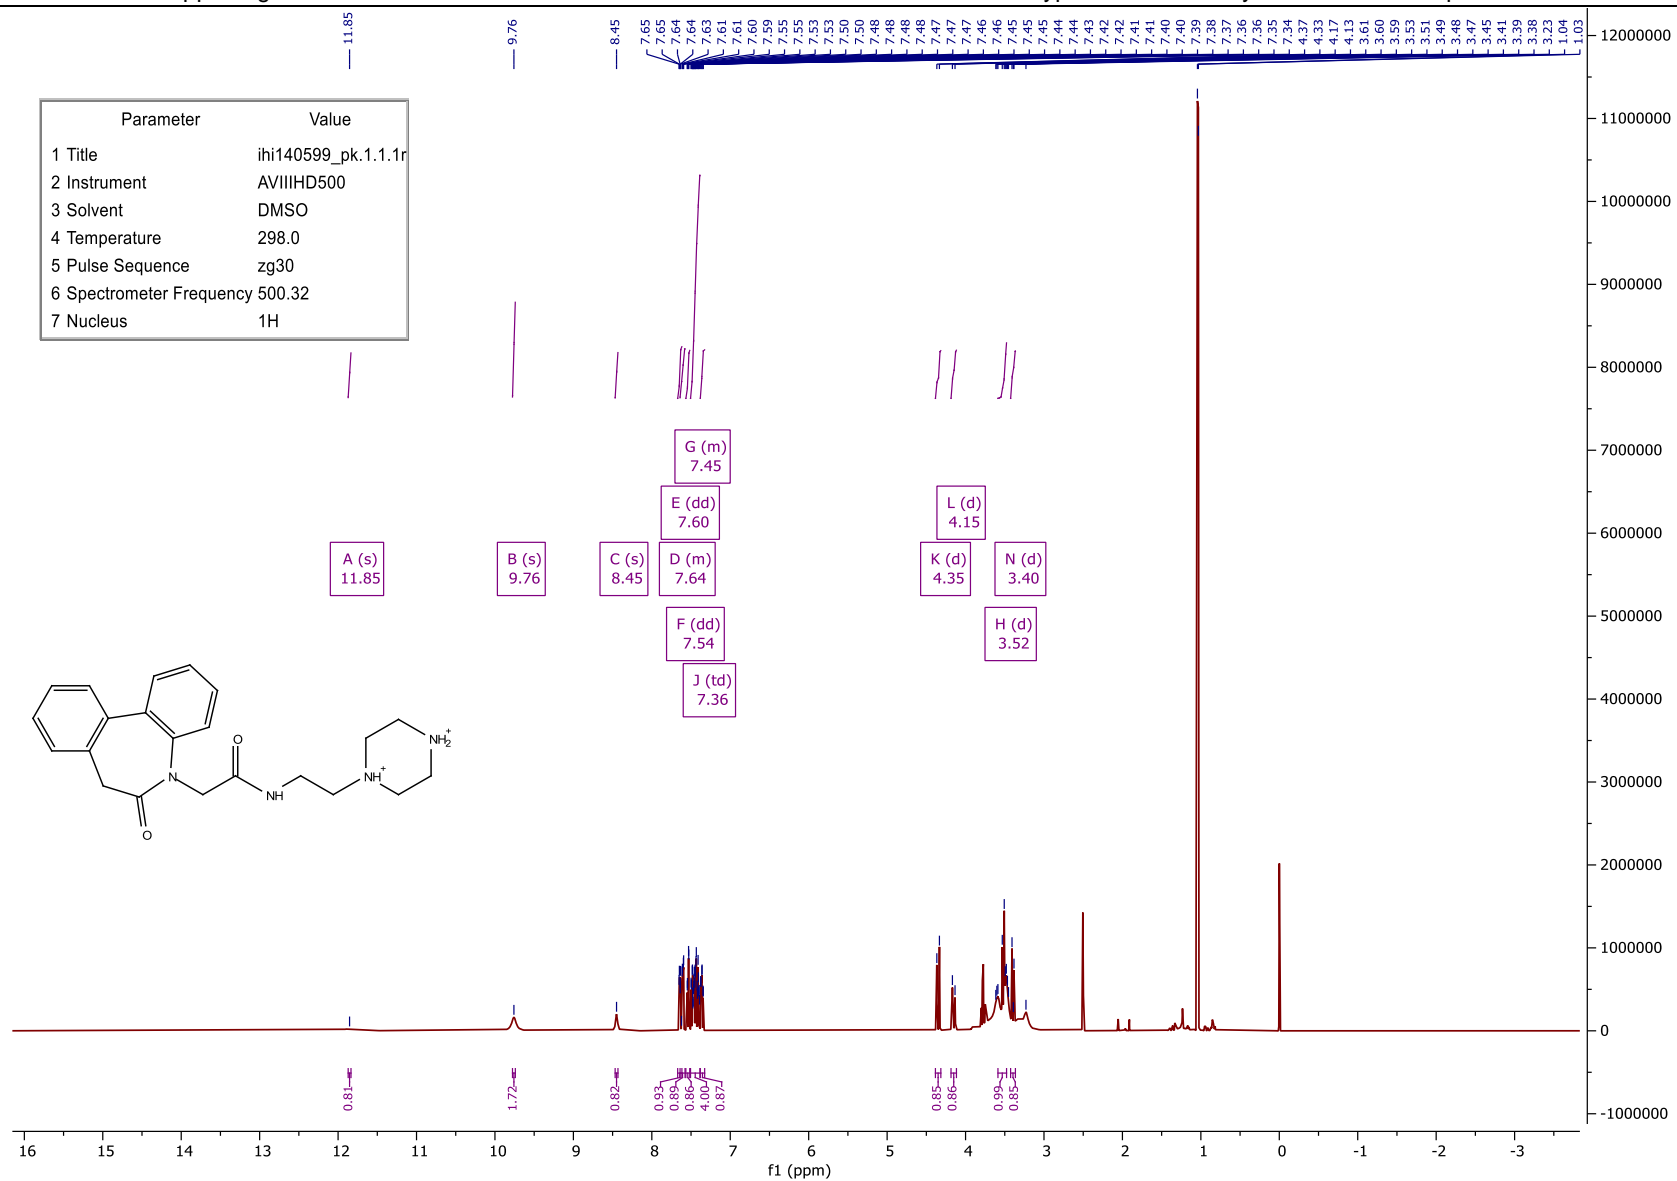

S1 File. Fig 28. <sup>1</sup>H-NMR spectrum of compound 4d.

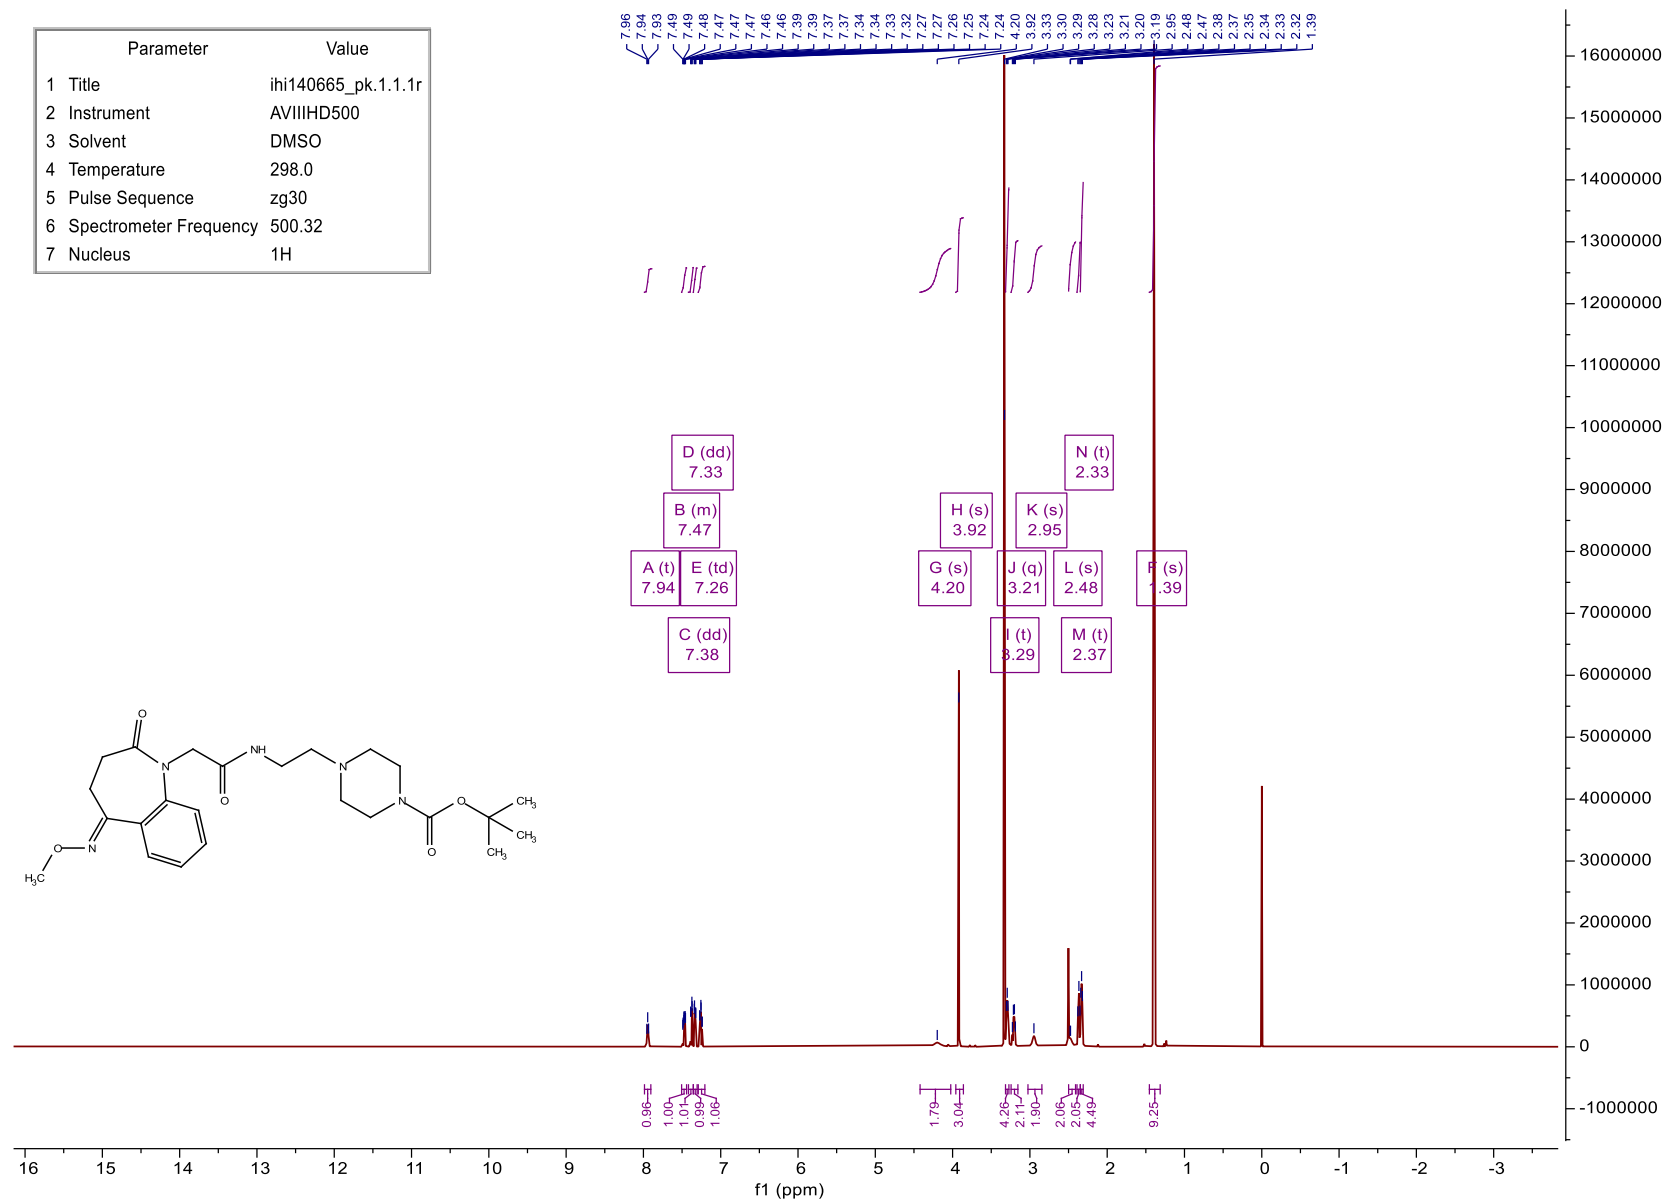

S1 File. Fig 29. <sup>1</sup>H-NMR spectrum of compound 5b.

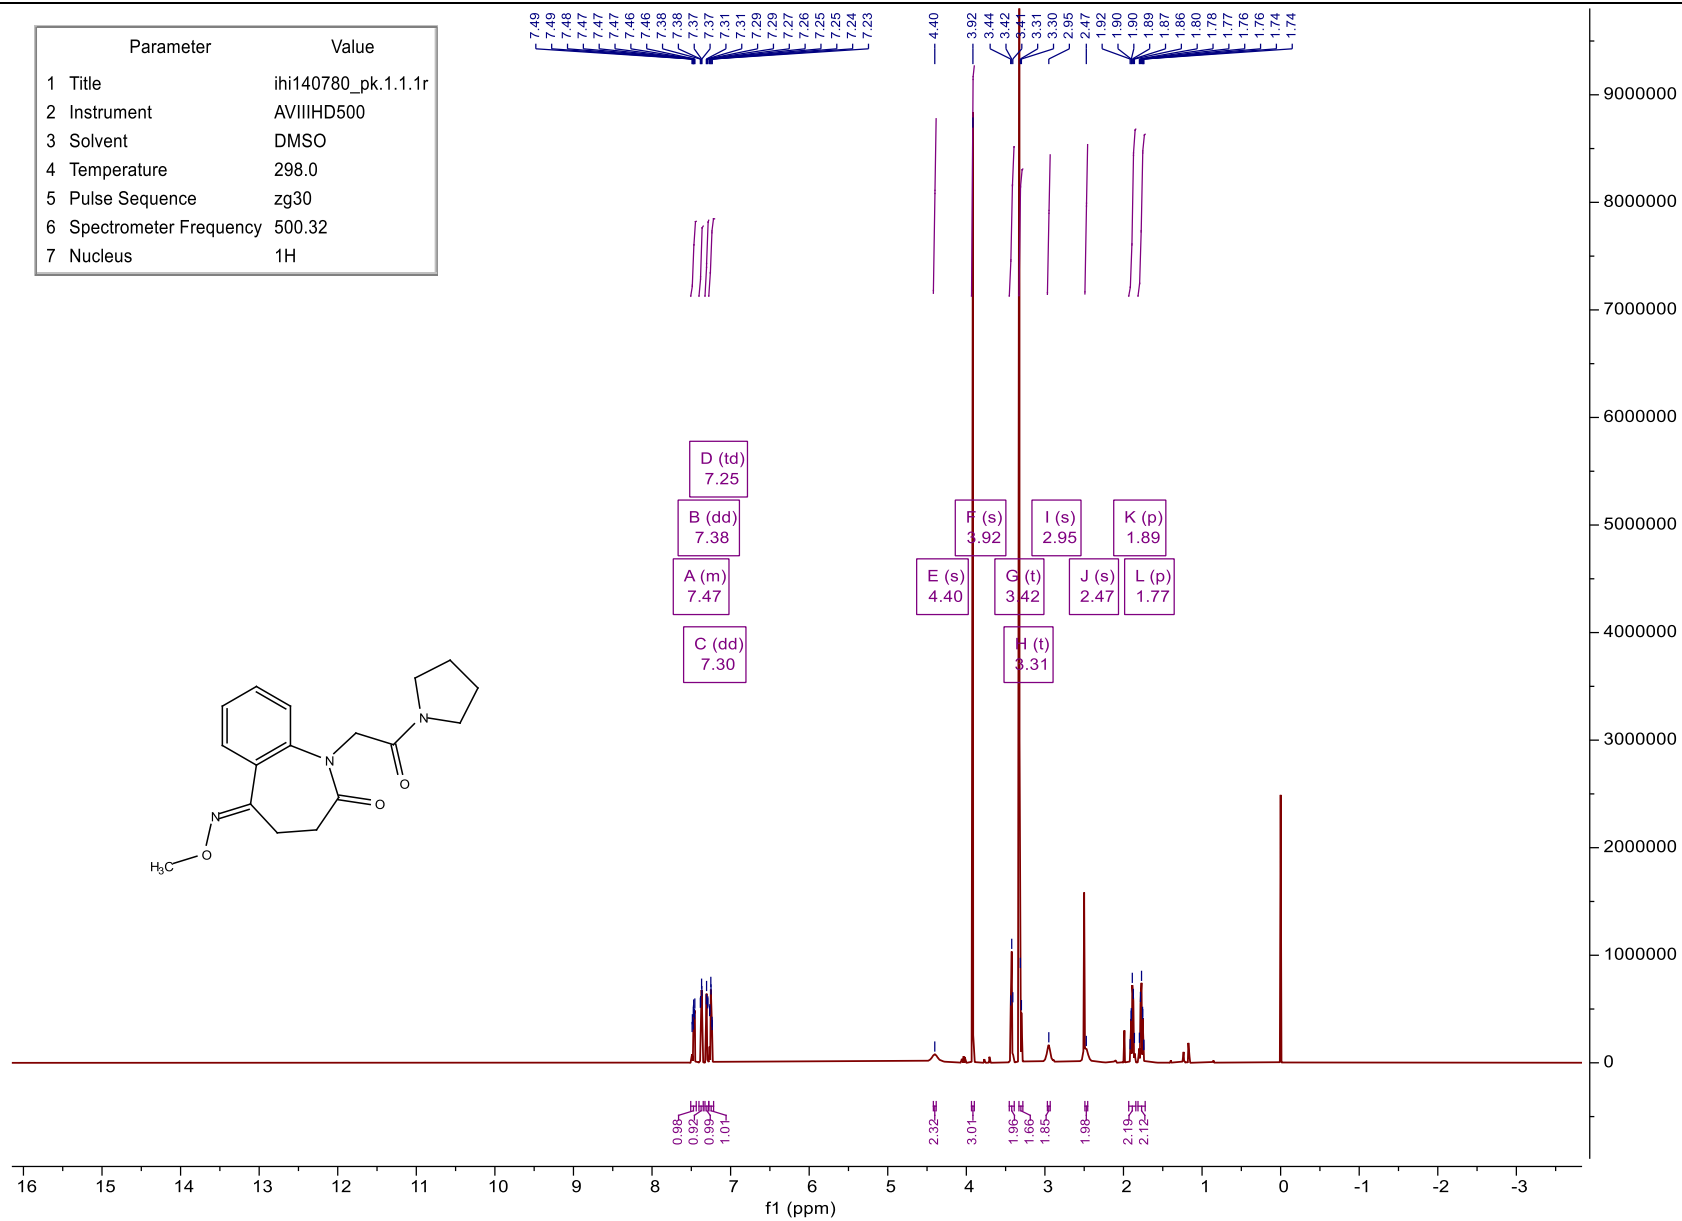

S1 File. Fig 30. <sup>1</sup>H-NMR spectrum of compound 5c.



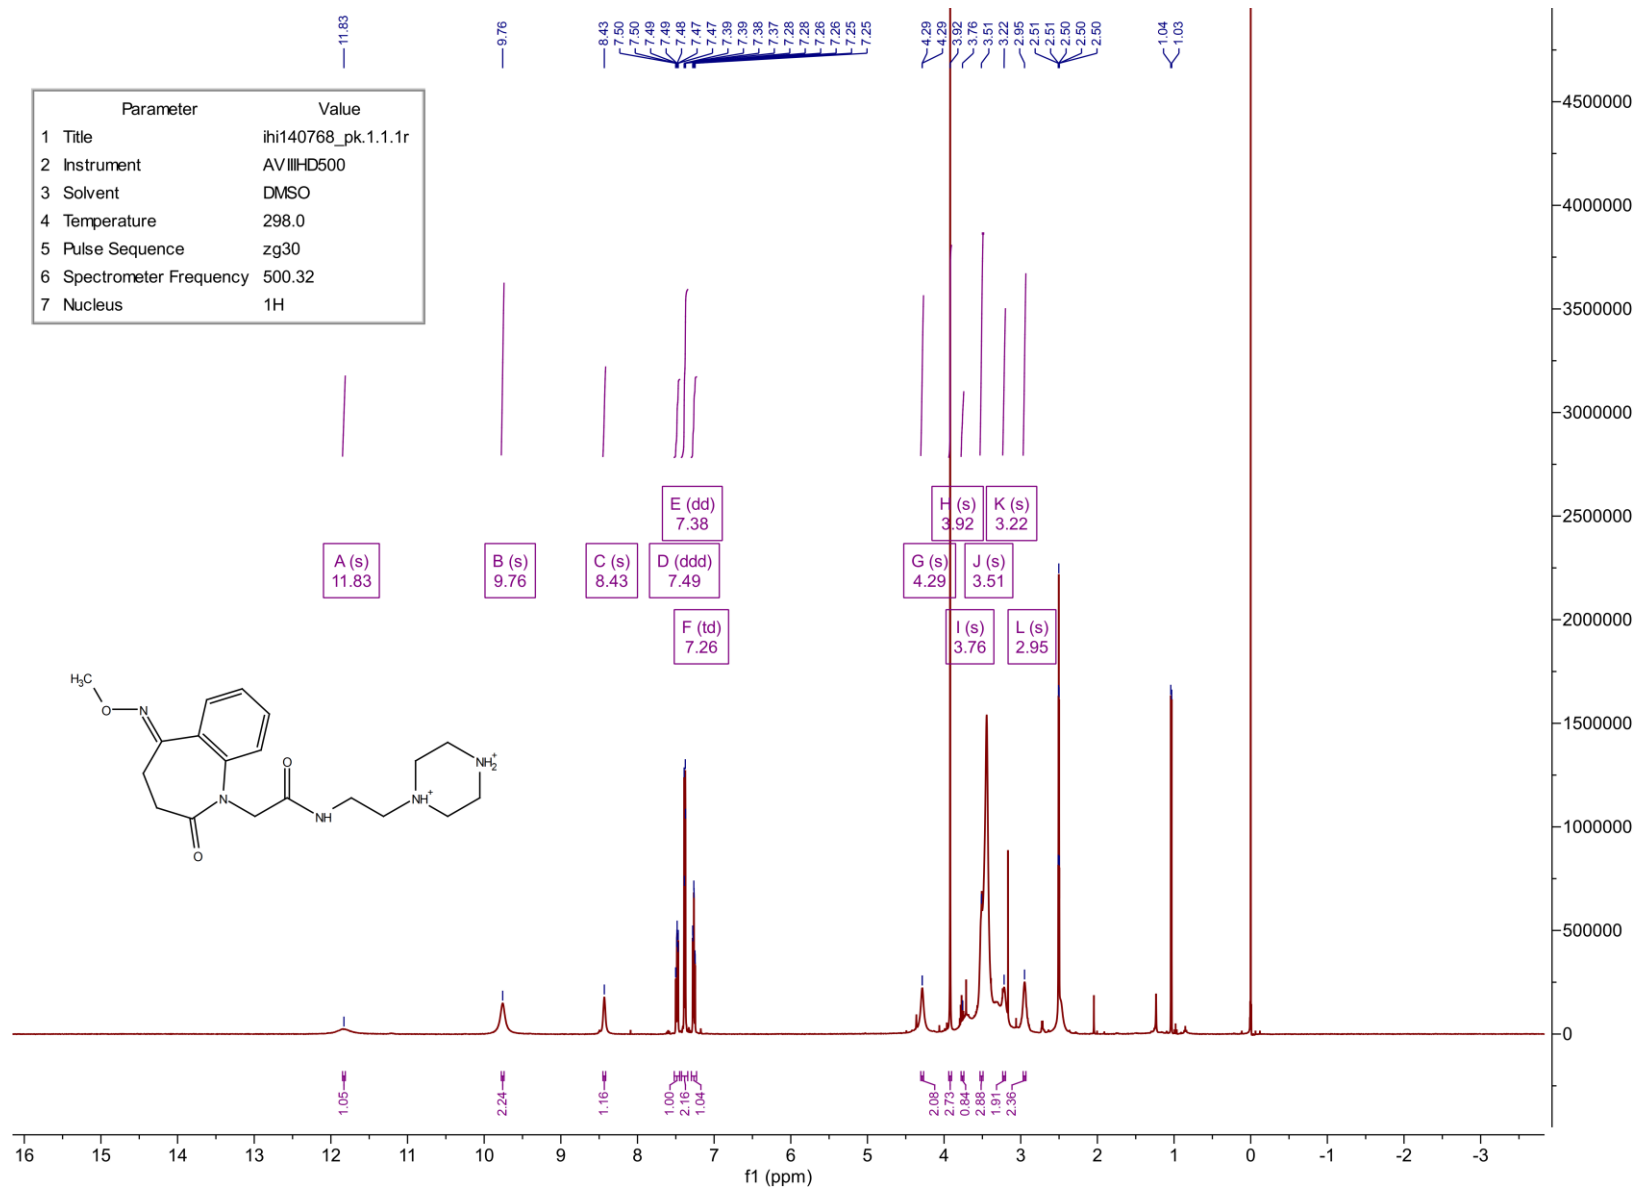

S1 File. Fig 31. <sup>1</sup>H-NMR spectrum of compound 5d.

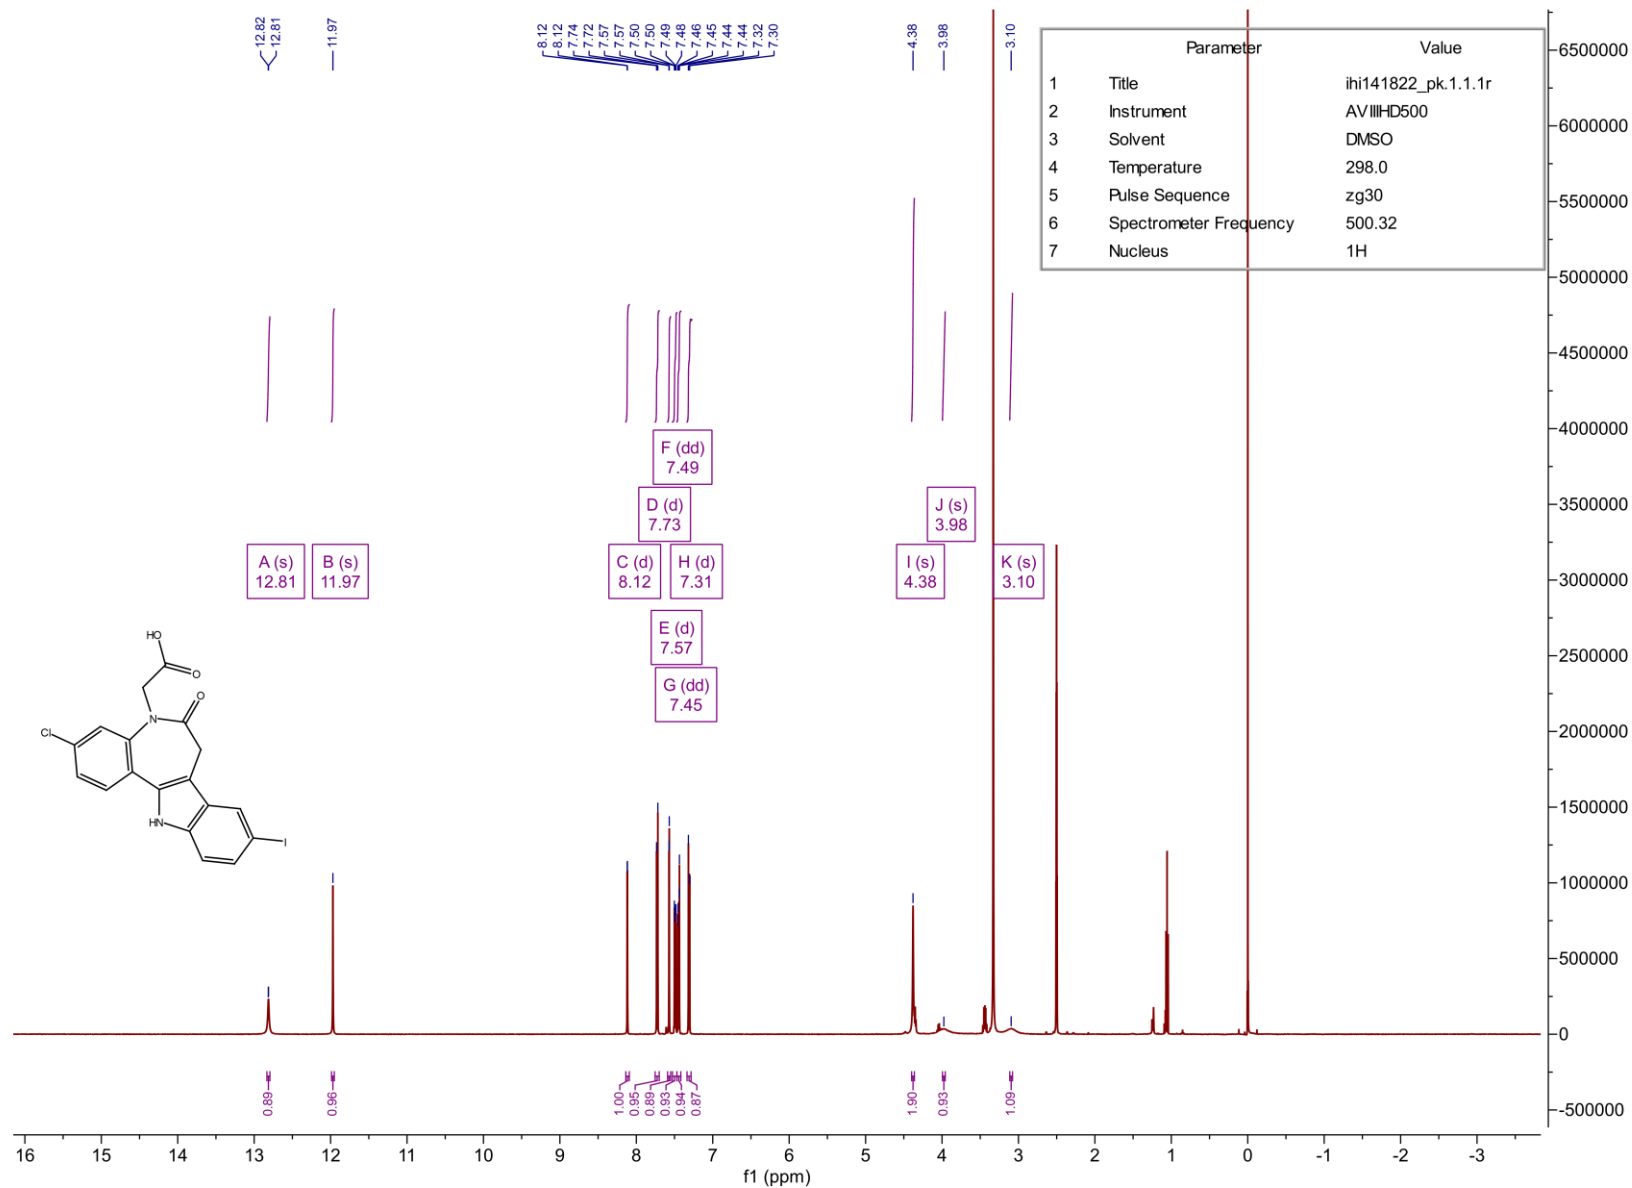

S1 File. Fig 32. <sup>1</sup>H-NMR spectrum of compound 9a.

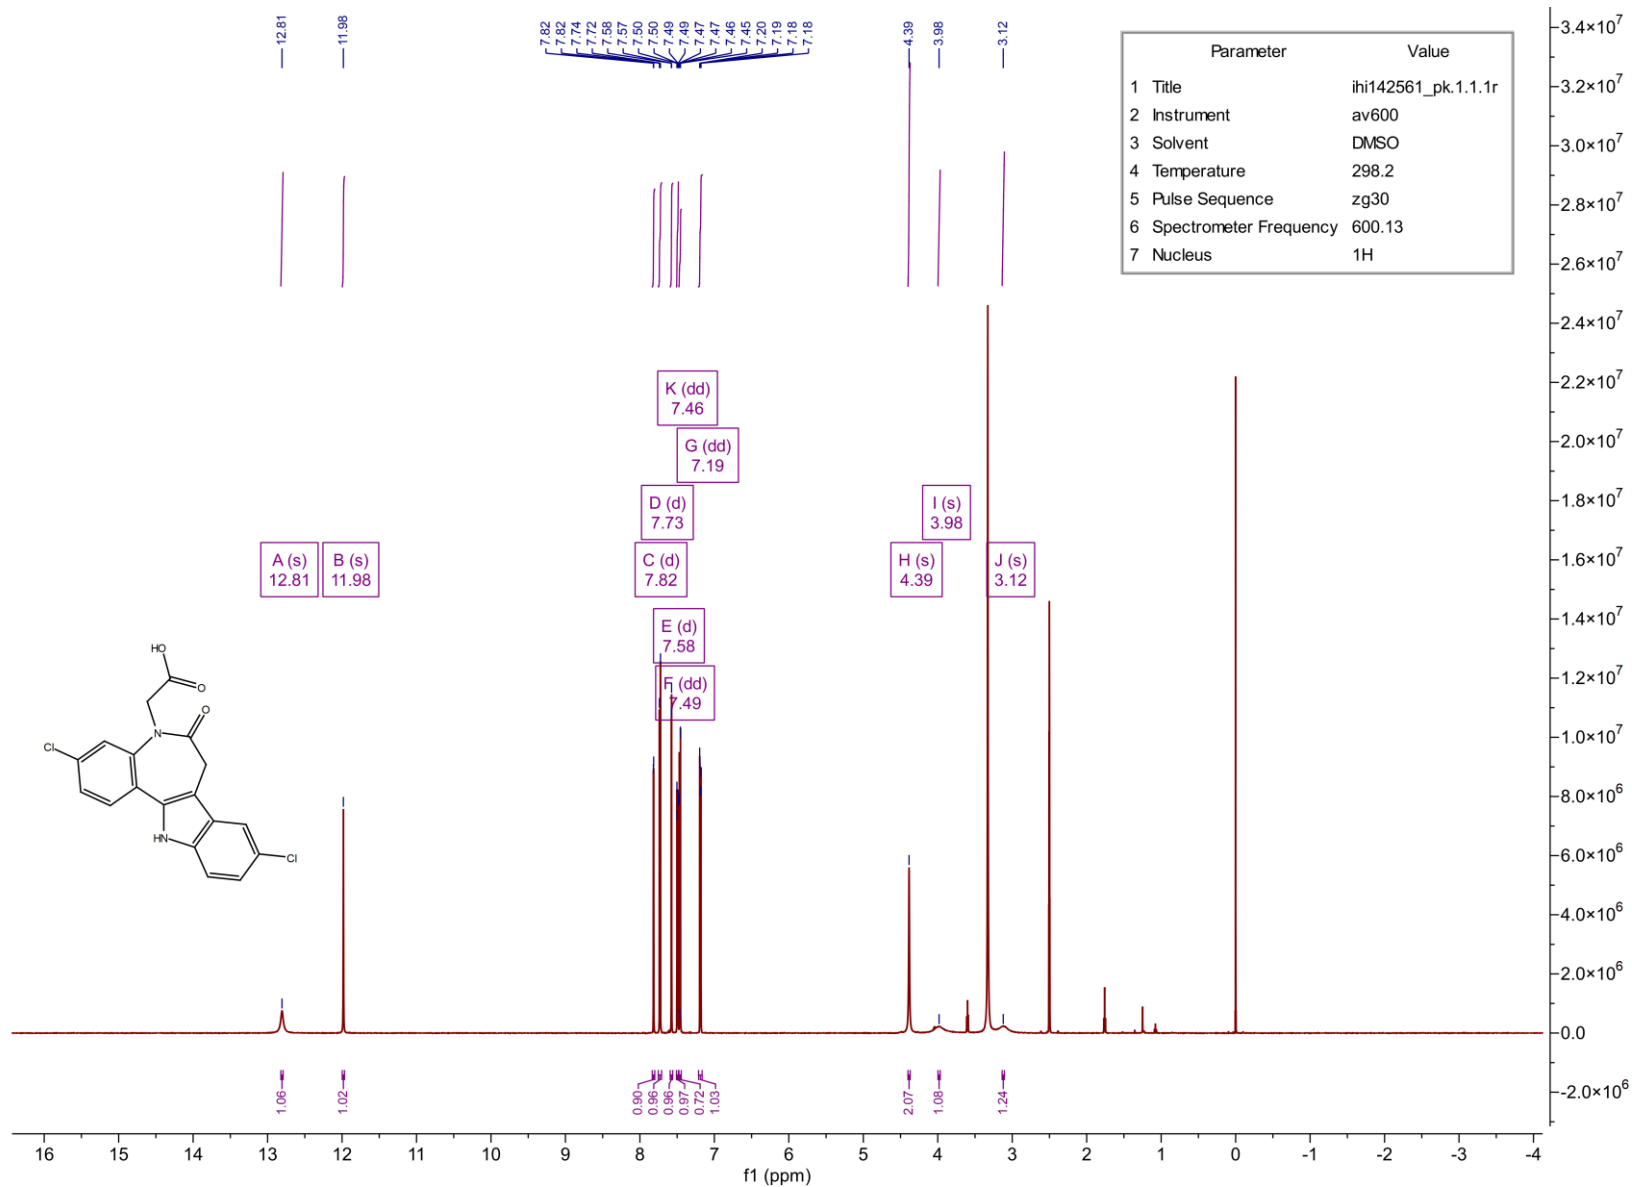

S1 File. Fig 33. <sup>1</sup>H-NMR spectrum of compound 9b.

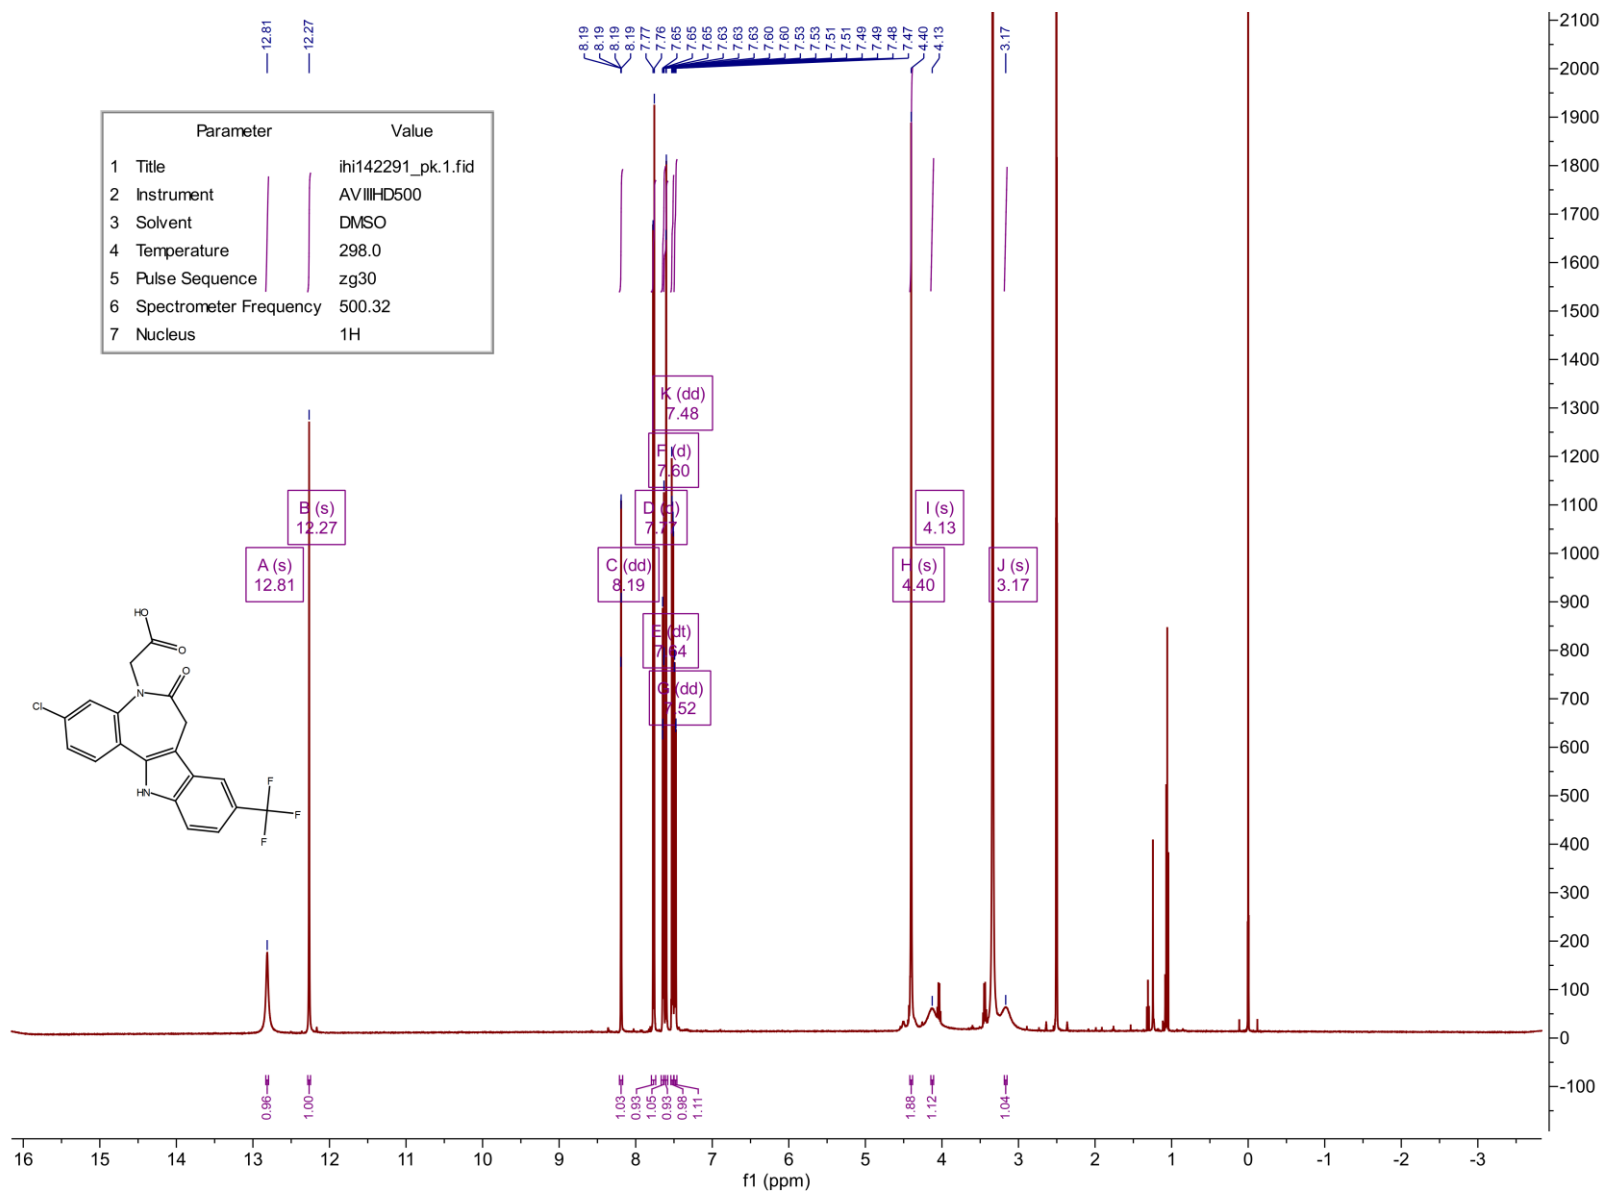

S1 File. Fig 34. <sup>1</sup>H-NMR spectrum of compound 9c.

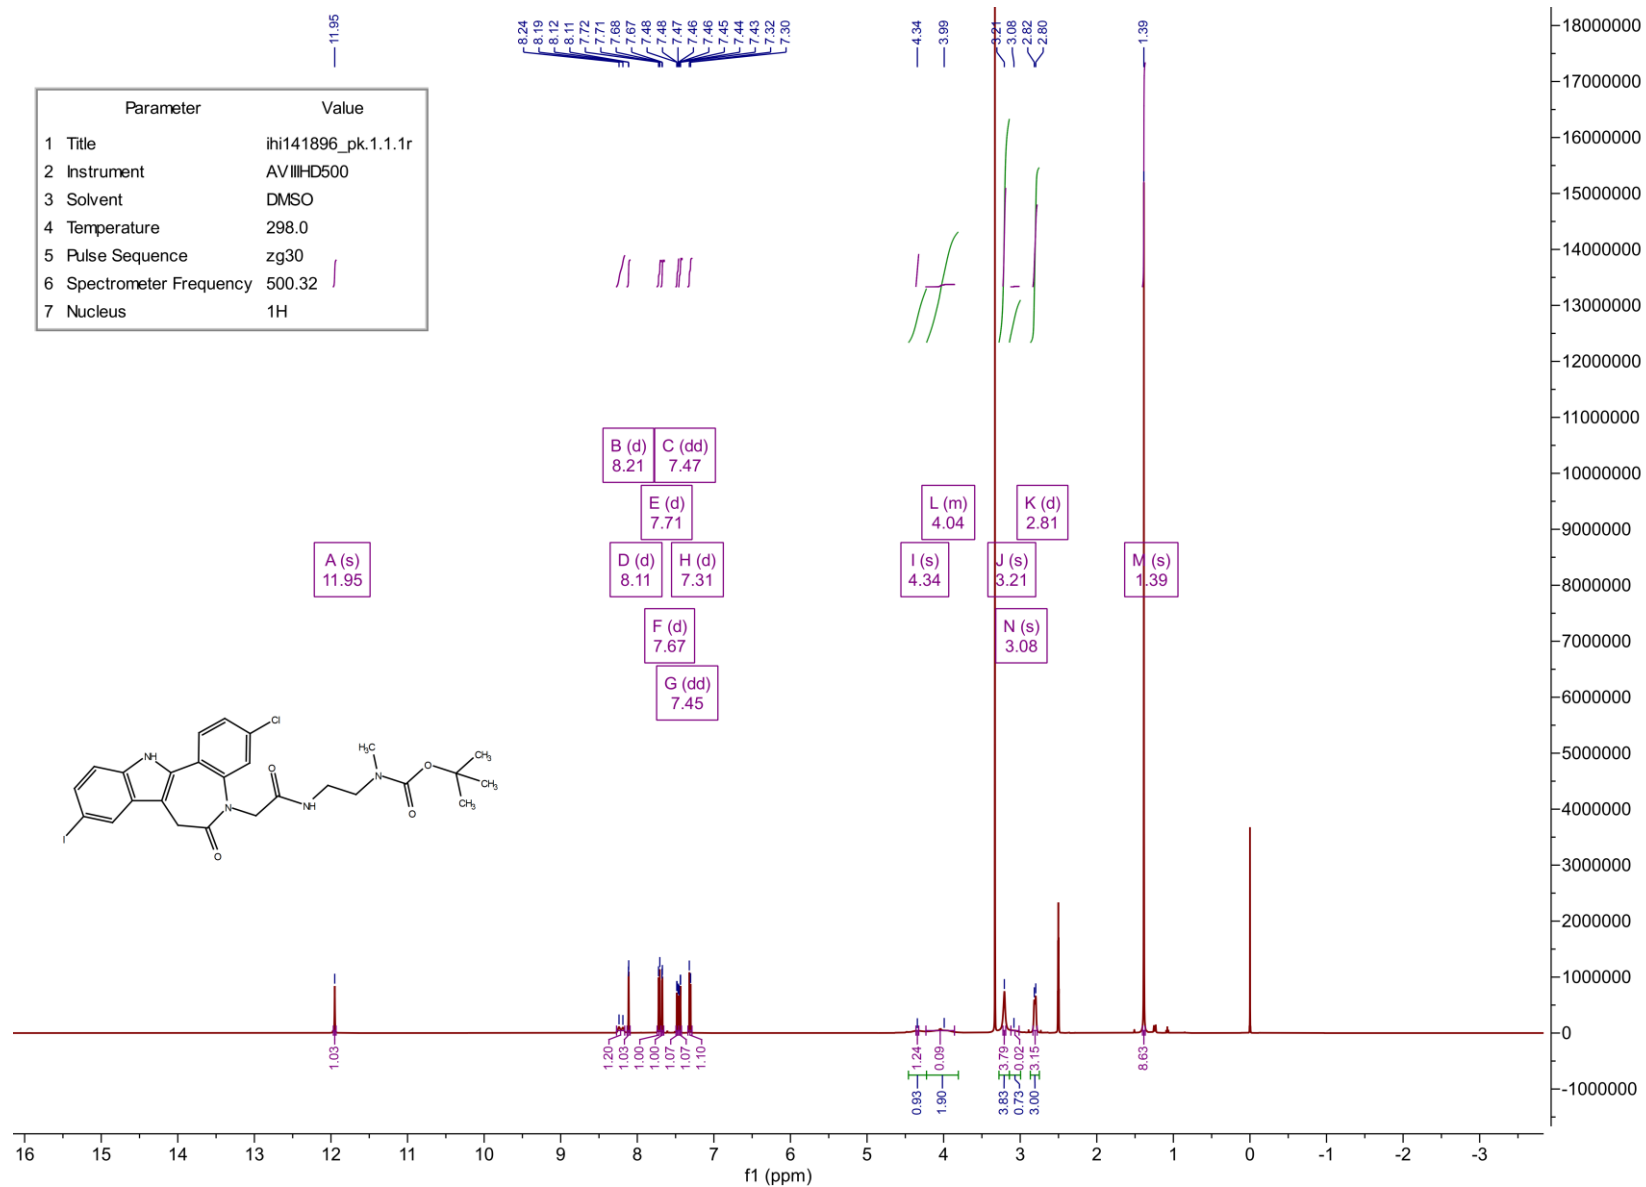

S1 File. Fig 35. <sup>1</sup>H-NMR spectrum of compound 10a.

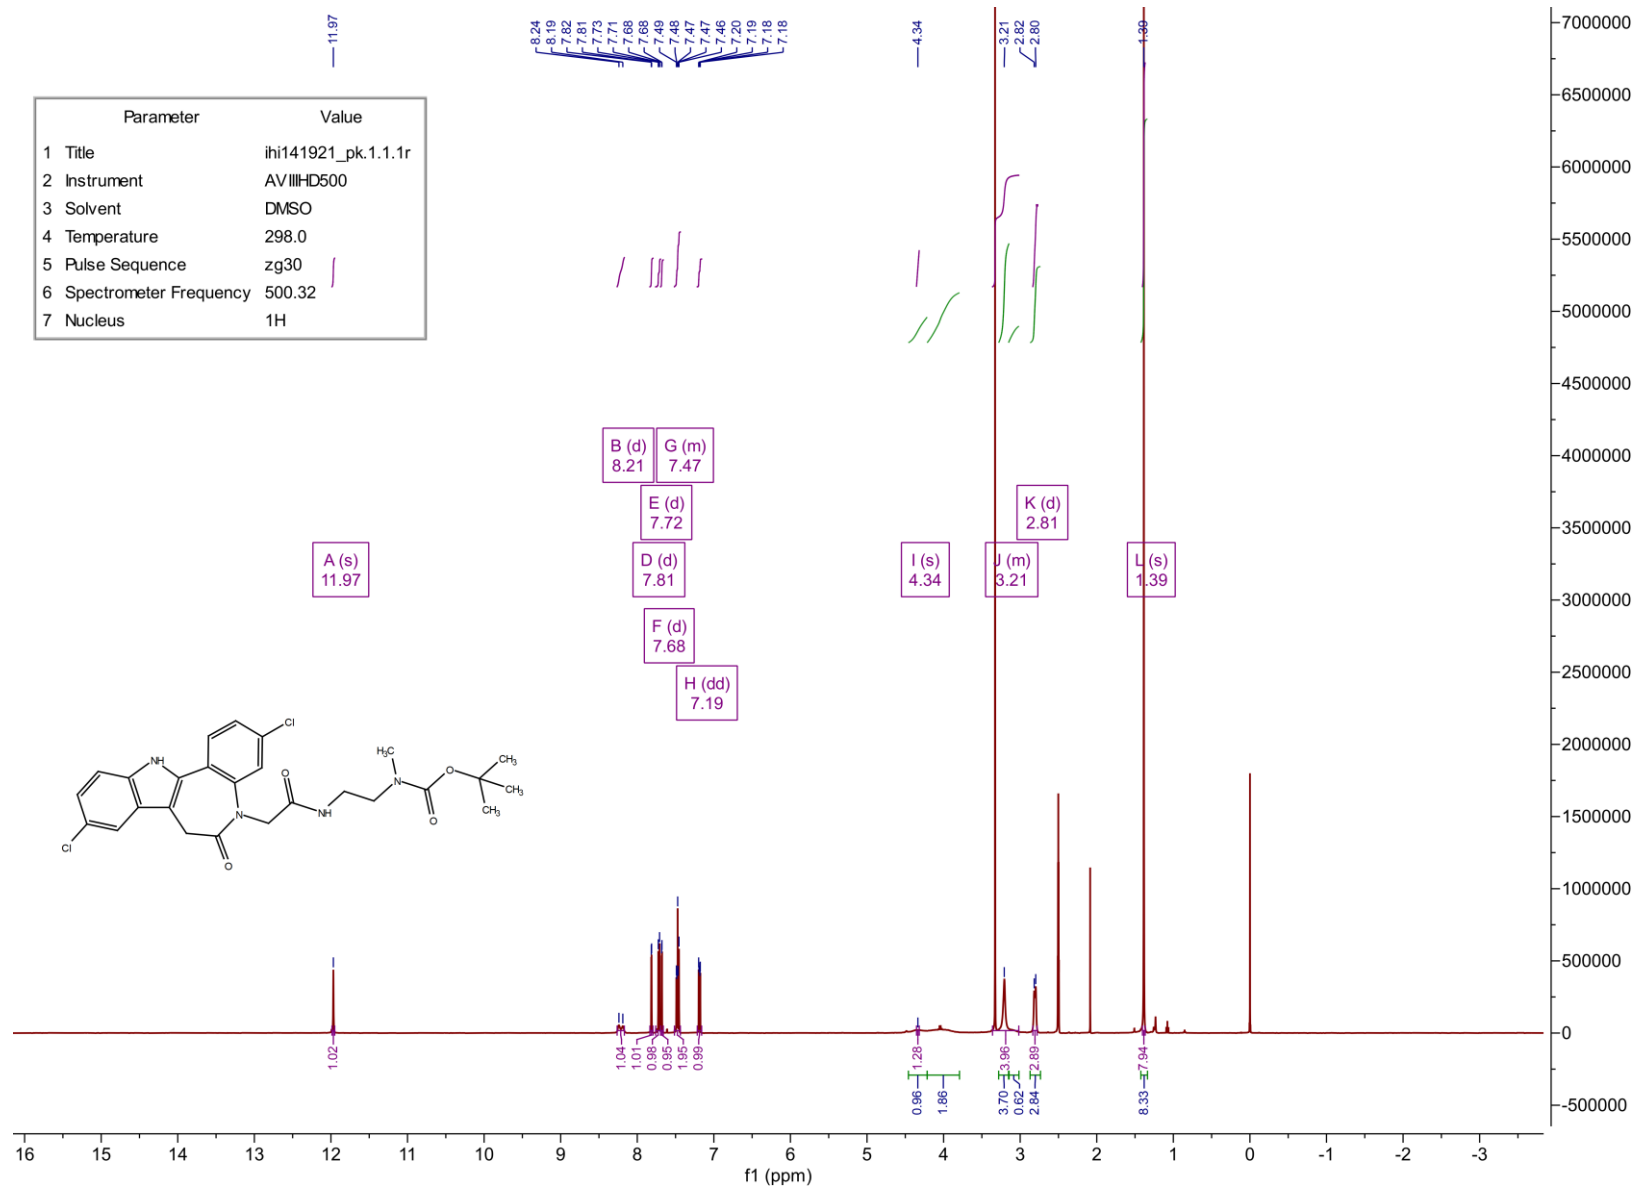

S1 File. Fig 36. <sup>1</sup>H-NMR spectrum of compound 10b.

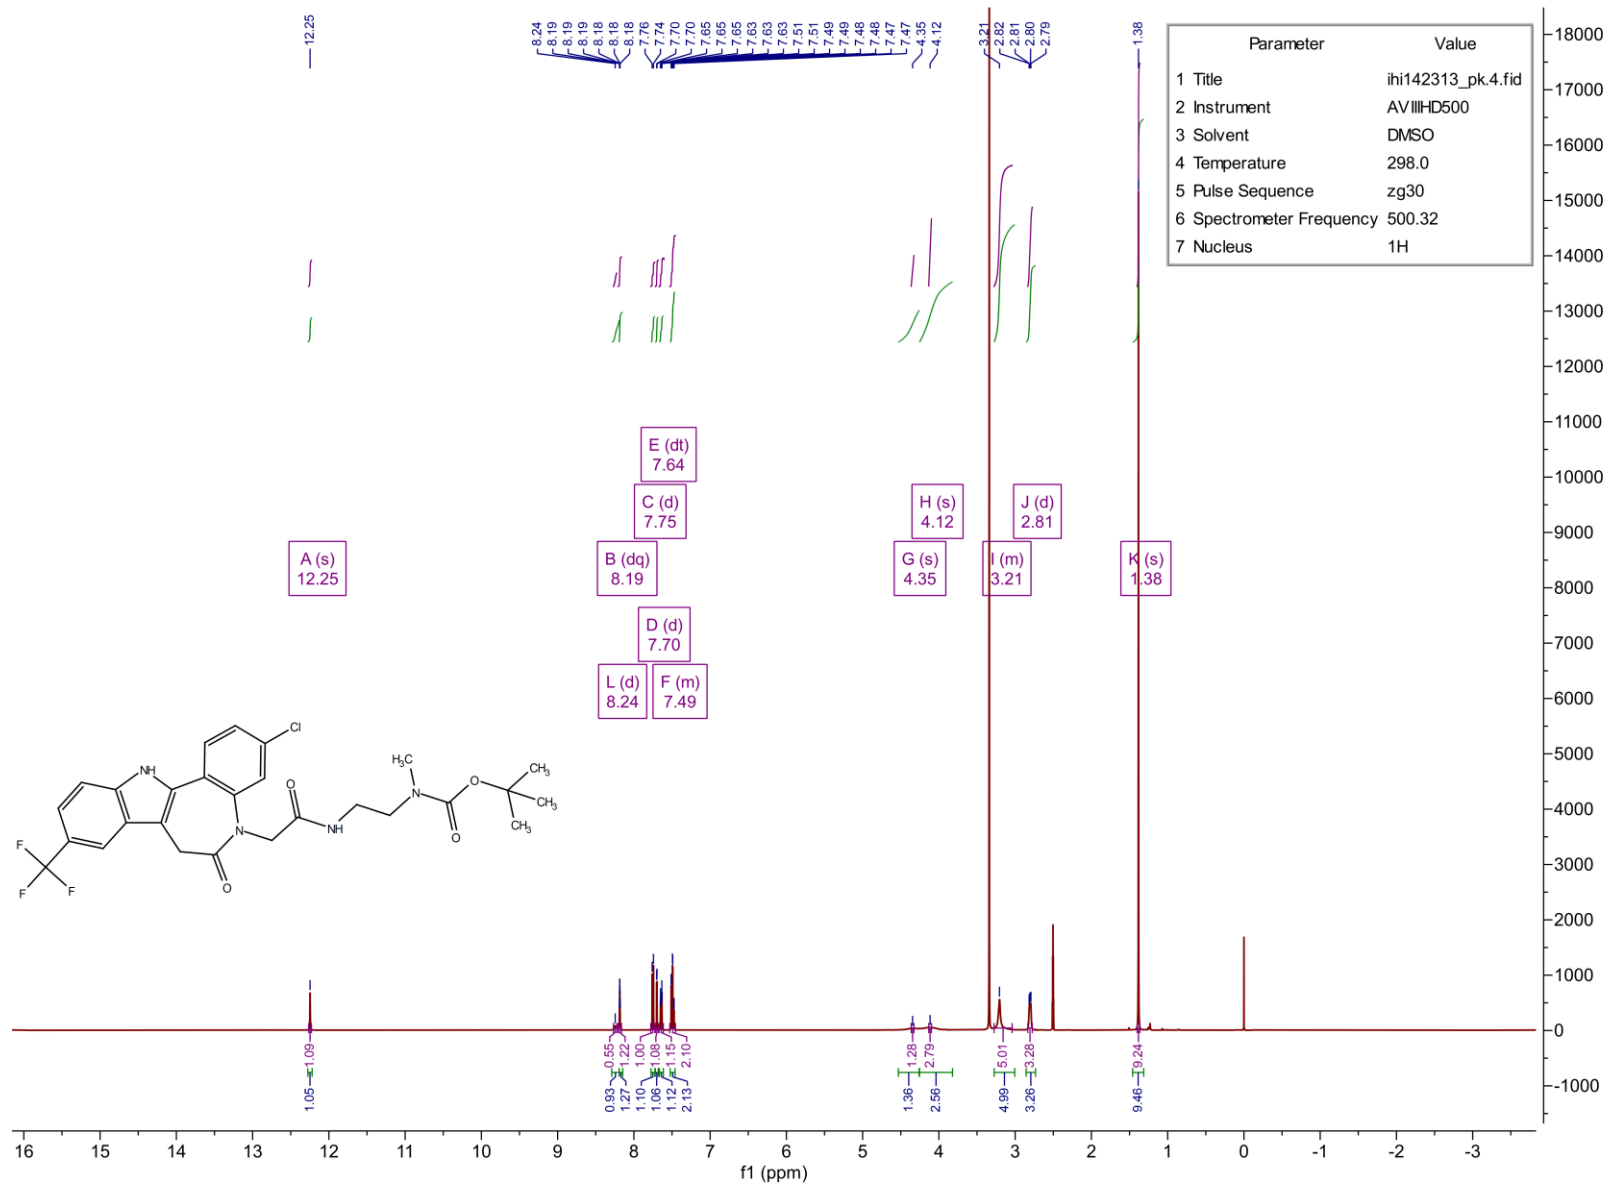

S1 File. Fig 37. <sup>1</sup>H-NMR spectrum of compound 10c.

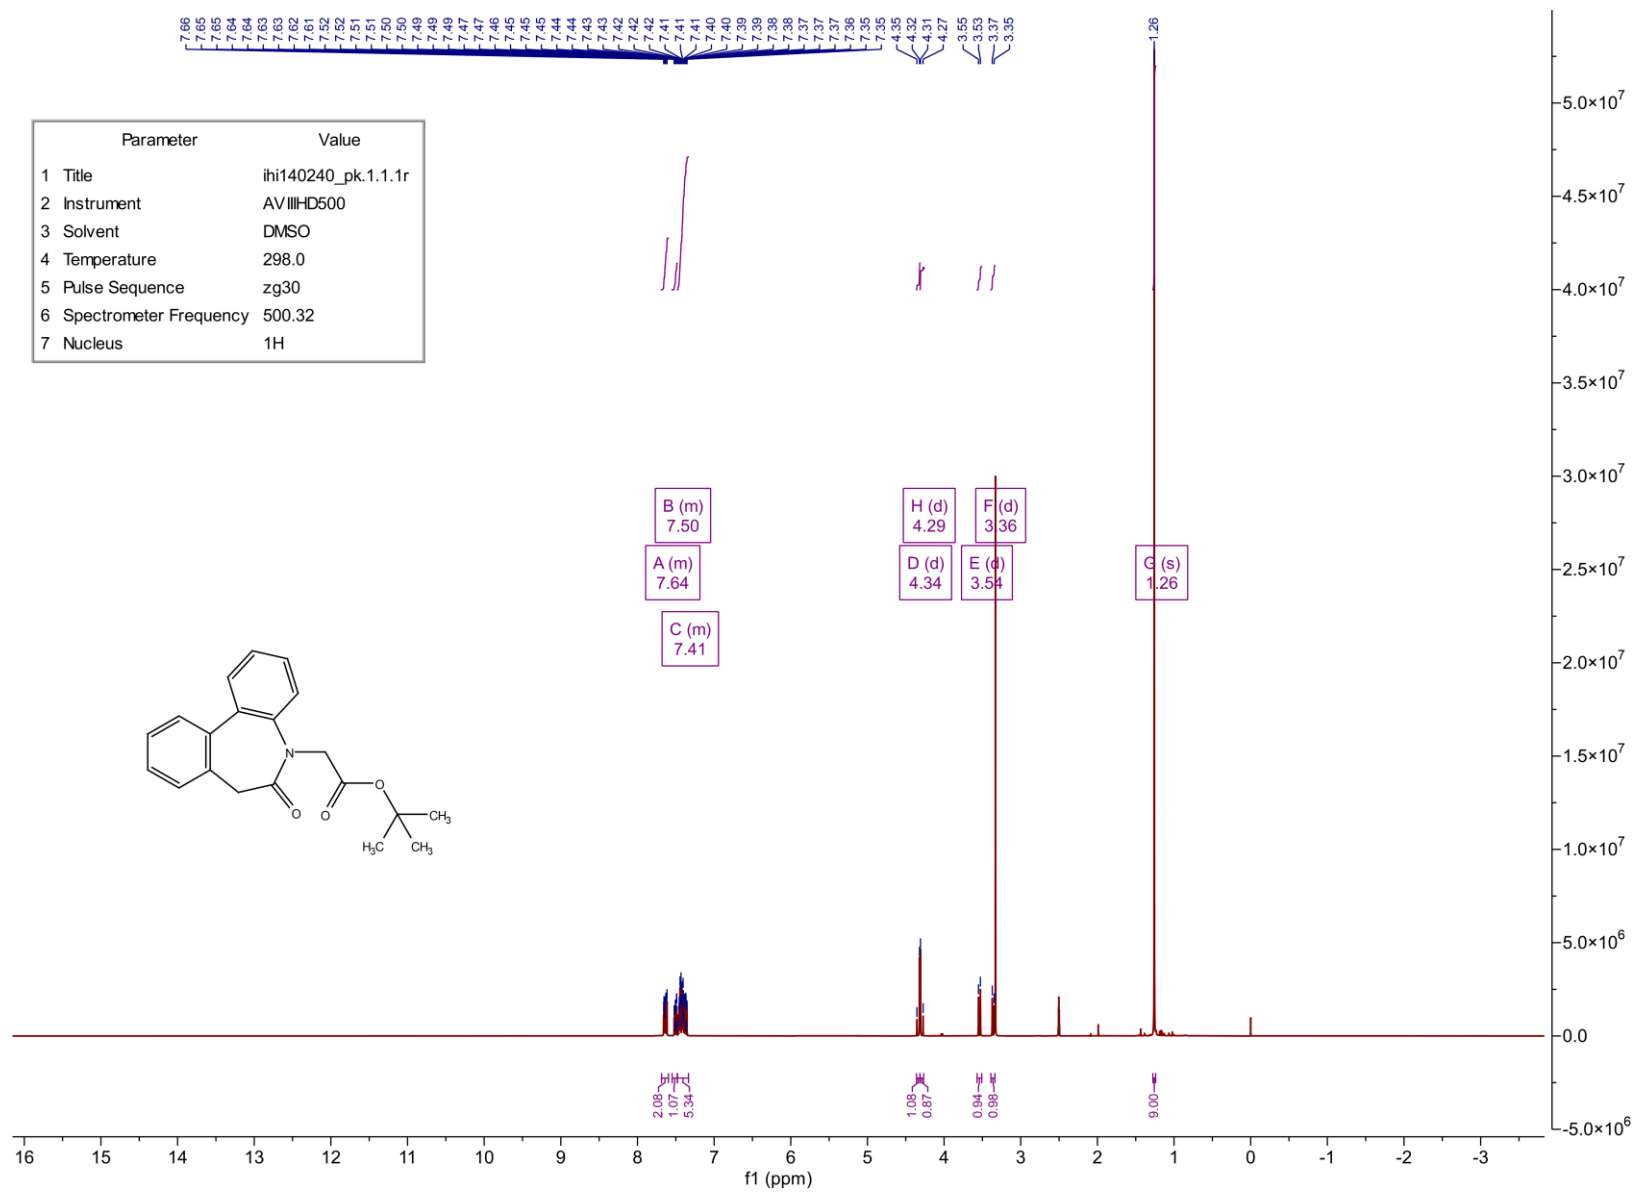

S1 File. Fig 38. <sup>1</sup>H-NMR spectrum of compound 18.



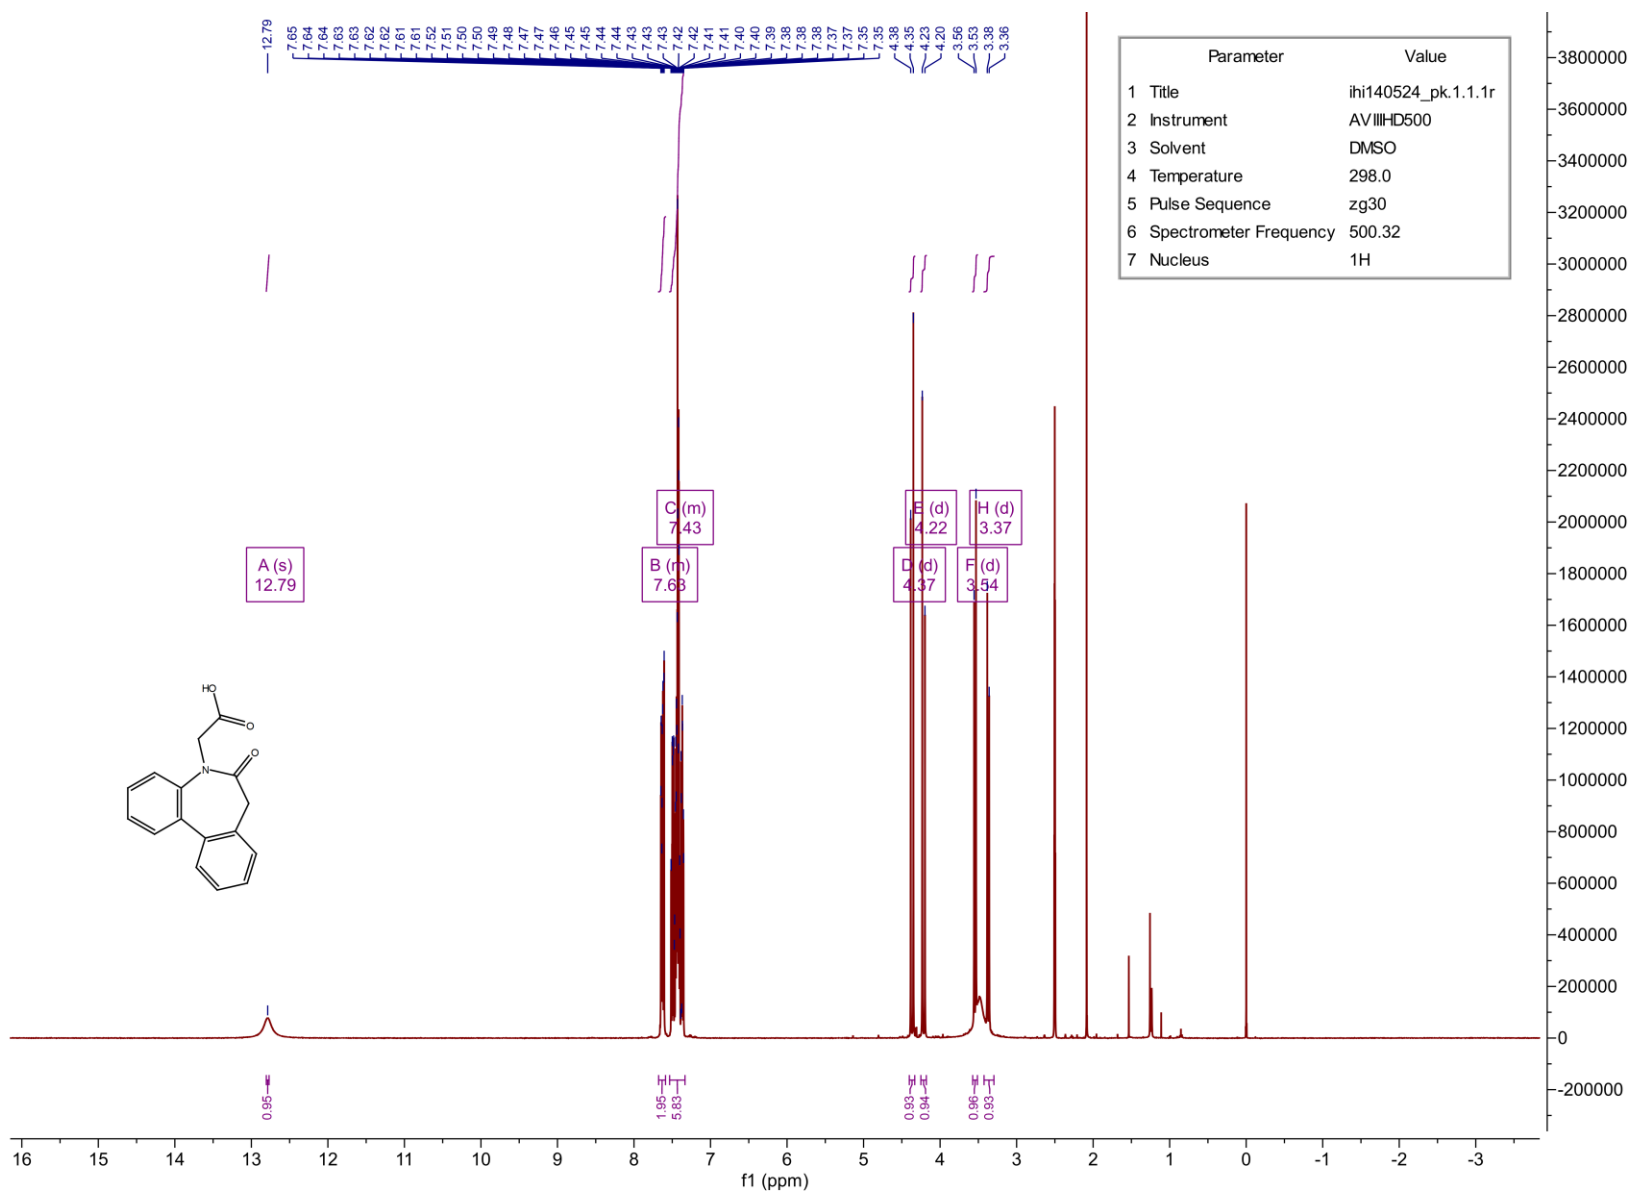

S1 File. Fig 39. <sup>1</sup>H-NMR spectrum of compound 19.

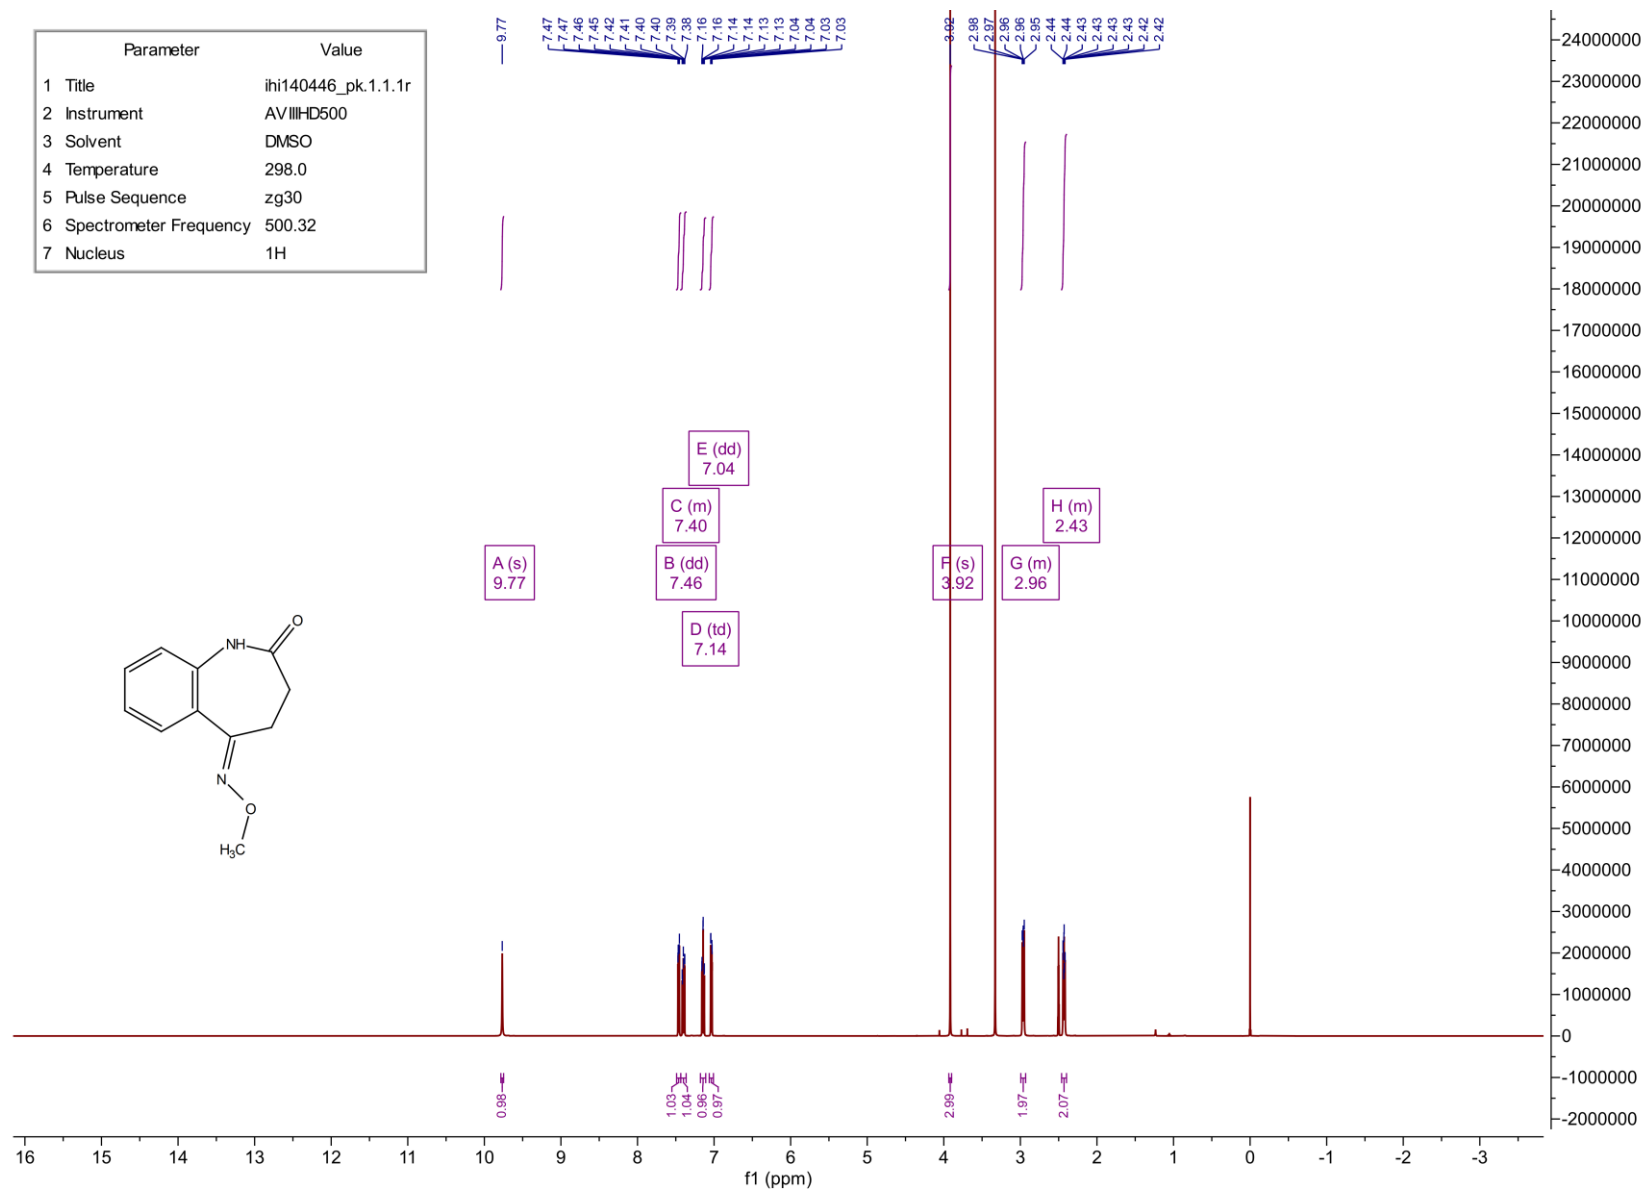

S1 File. Fig 40. <sup>1</sup>H-NMR spectrum of compound 20.

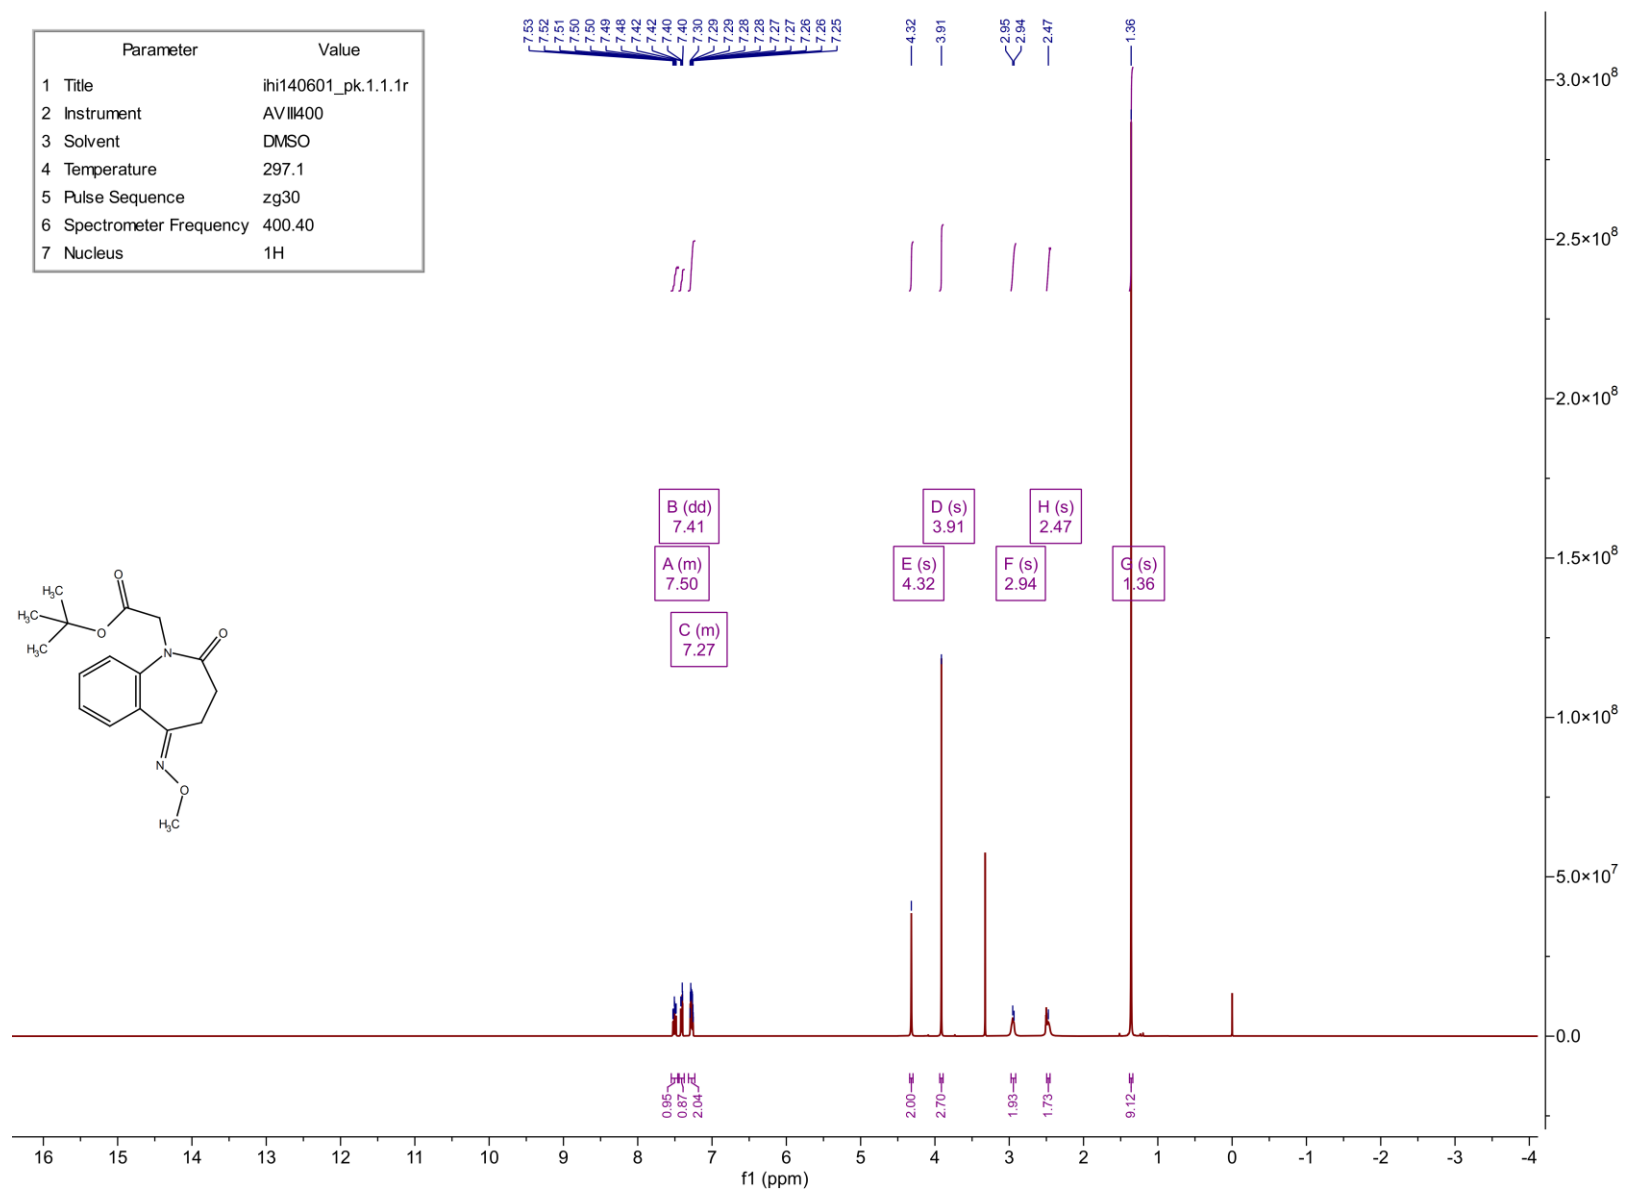

S1 File. Fig 41. <sup>1</sup>H-NMR spectrum of compound 21.

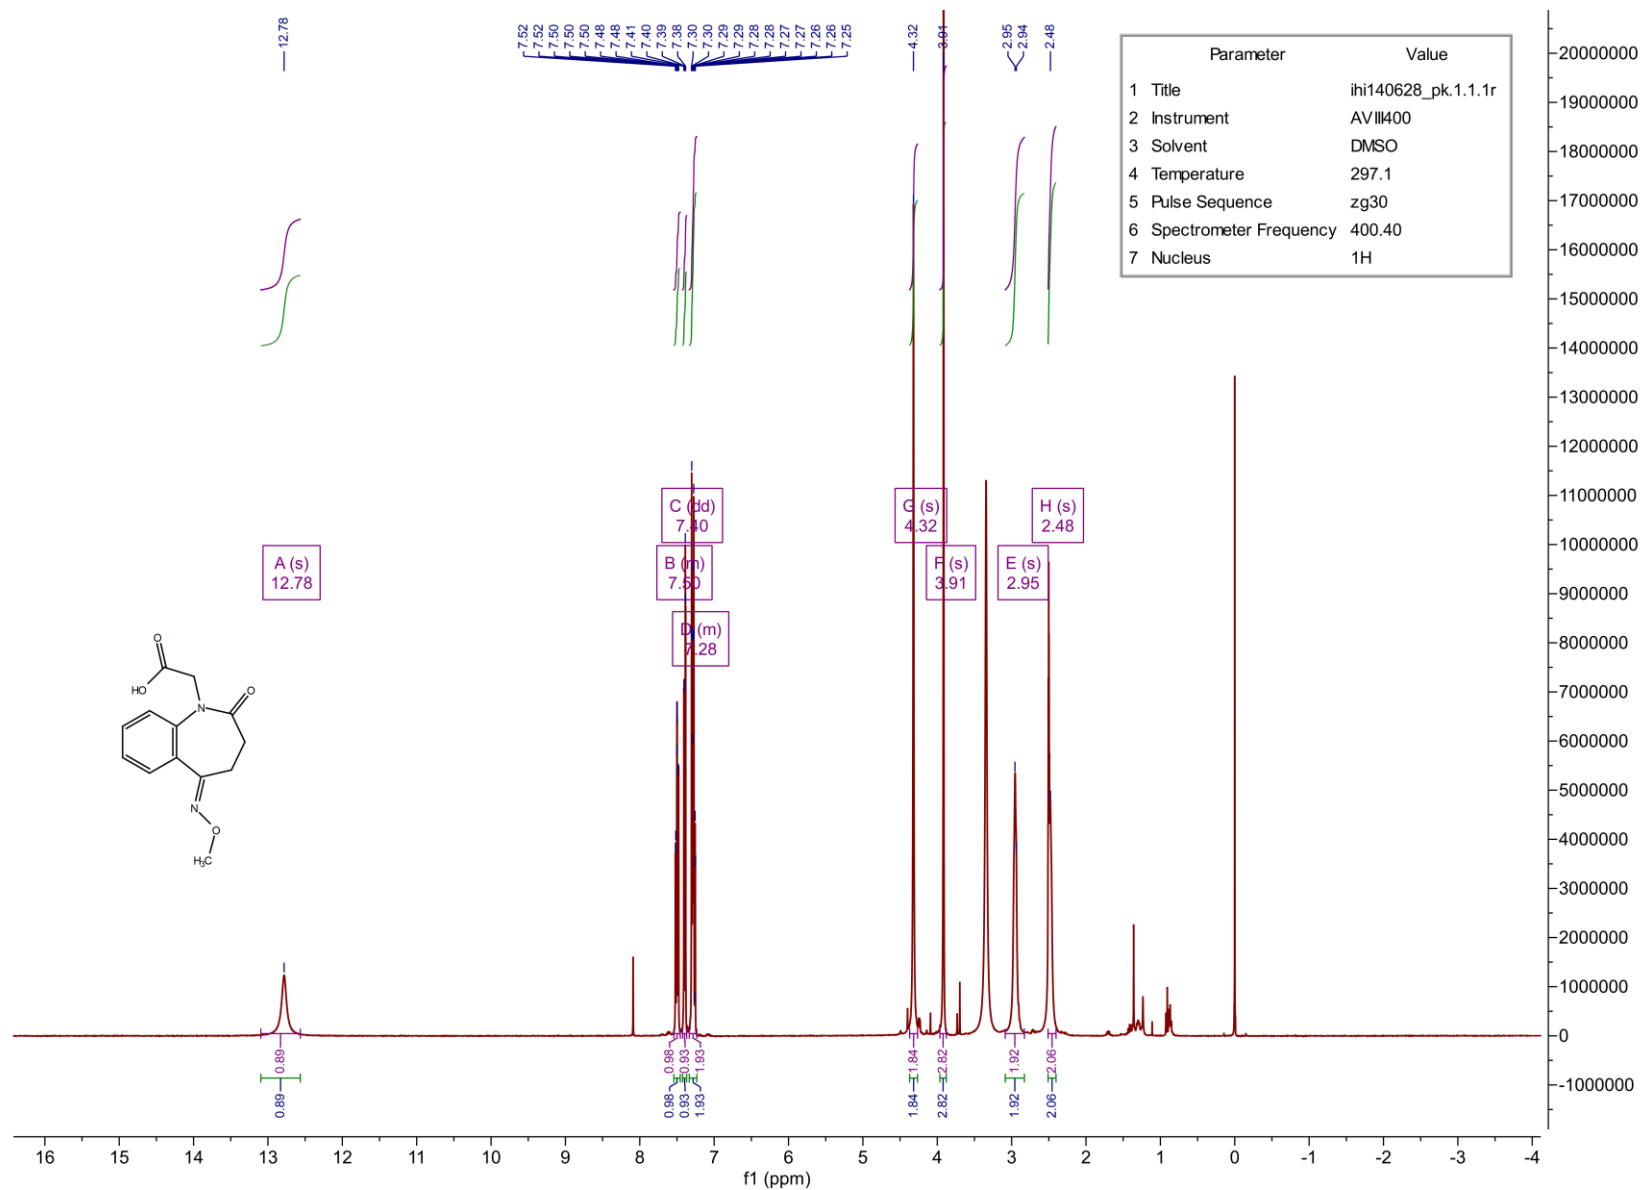

S1 File. Fig 42. <sup>1</sup>H-NMR spectrum of compound 22.
