# Supplementary material for: The indole motif is essential for the antitrypanosomal activity of N5-substituted paullones
Source: PubMed Central journal article supplement (PMC10688702; doi:10.1371/journal.pone.0292946), 2023-11-30
Supplement: pone.0292946.s002.pdf [file pone.0292946.s002.pdf]

# The indole motif is essential for the antitrypanosomal activity of N<sup>5</sup>-substituted paullones

Irina Ihnatenko, Marco J. Müller, Oliver C. F. Orban, Jens C. Lindhof, Diego Benítez, Cecilia Ortíz, Estefanía Dibello, Leonardo L. Seidl, Marcelo A. Comini and Conrad Kunick\*

**S3 File. Figs 1–11. <sup>1</sup>H-NMR spectra of selected compounds after H/D-exchange.**

**Table of contents:**  $^1\text{H}$ -NMR spectra of selected compounds after H/D-exchange.

|                                                                                     |    |
|-------------------------------------------------------------------------------------|----|
| S3 File. Fig 1. $^1\text{H}$ -NMR spectrum of compound 1h after H/D-exchange. ....  | 3  |
| S3 File. Fig 2. $^1\text{H}$ -NMR spectrum of compound 2q after H/D-exchange. ....  | 4  |
| S3 File. Fig 3. $^1\text{H}$ -NMR spectrum of compound 2r after H/D-exchange. ....  | 5  |
| S3 File. Fig 4. $^1\text{H}$ -NMR spectrum of compound 2s after H/D-exchange. ....  | 6  |
| S3 File. Fig 5. $^1\text{H}$ -NMR spectrum of compound 2t after H/D-exchange. ....  | 7  |
| S3 File. Fig 6. $^1\text{H}$ -NMR spectrum of compound 2u after H/D-exchange. ....  | 8  |
| S3 File. Fig 7. $^1\text{H}$ -NMR spectrum of compound 2v after H/D-exchange. ....  | 9  |
| S3 File. Fig 8. $^1\text{H}$ -NMR spectrum of compound 3d after H/D-exchange. ....  | 10 |
| S3 File. Fig 9. $^1\text{H}$ -NMR spectrum of compound 3e after H/D-exchange. ....  | 11 |
| S3 File. Fig 10. $^1\text{H}$ -NMR spectrum of compound 5b after H/D-exchange. .... | 12 |
| S3 File. Fig 11. $^1\text{H}$ -NMR spectrum of compound 16 after H/D-exchange. .... | 13 |

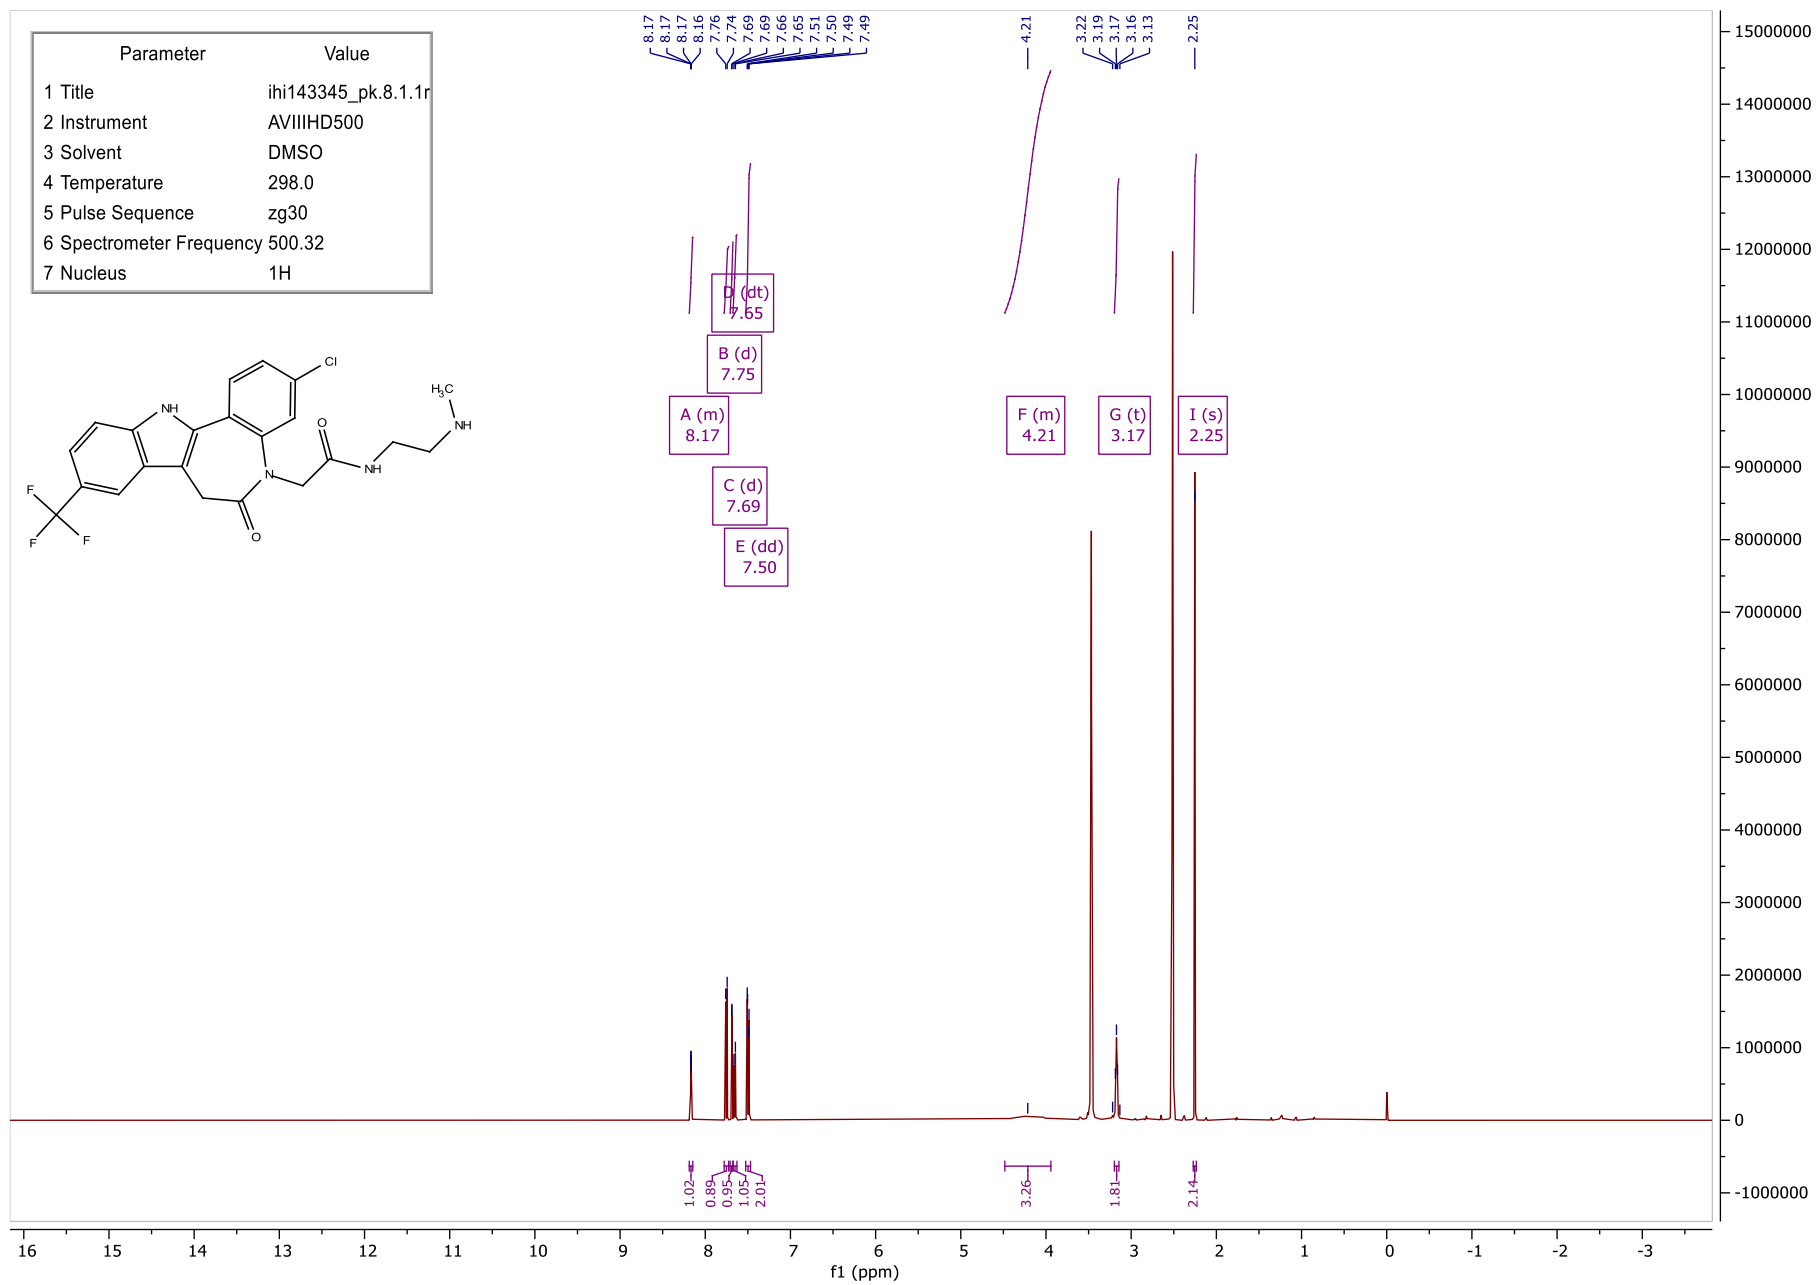

S3 File. Fig 1. <sup>1</sup>H-NMR spectrum of compound 1h after H/D-exchange.

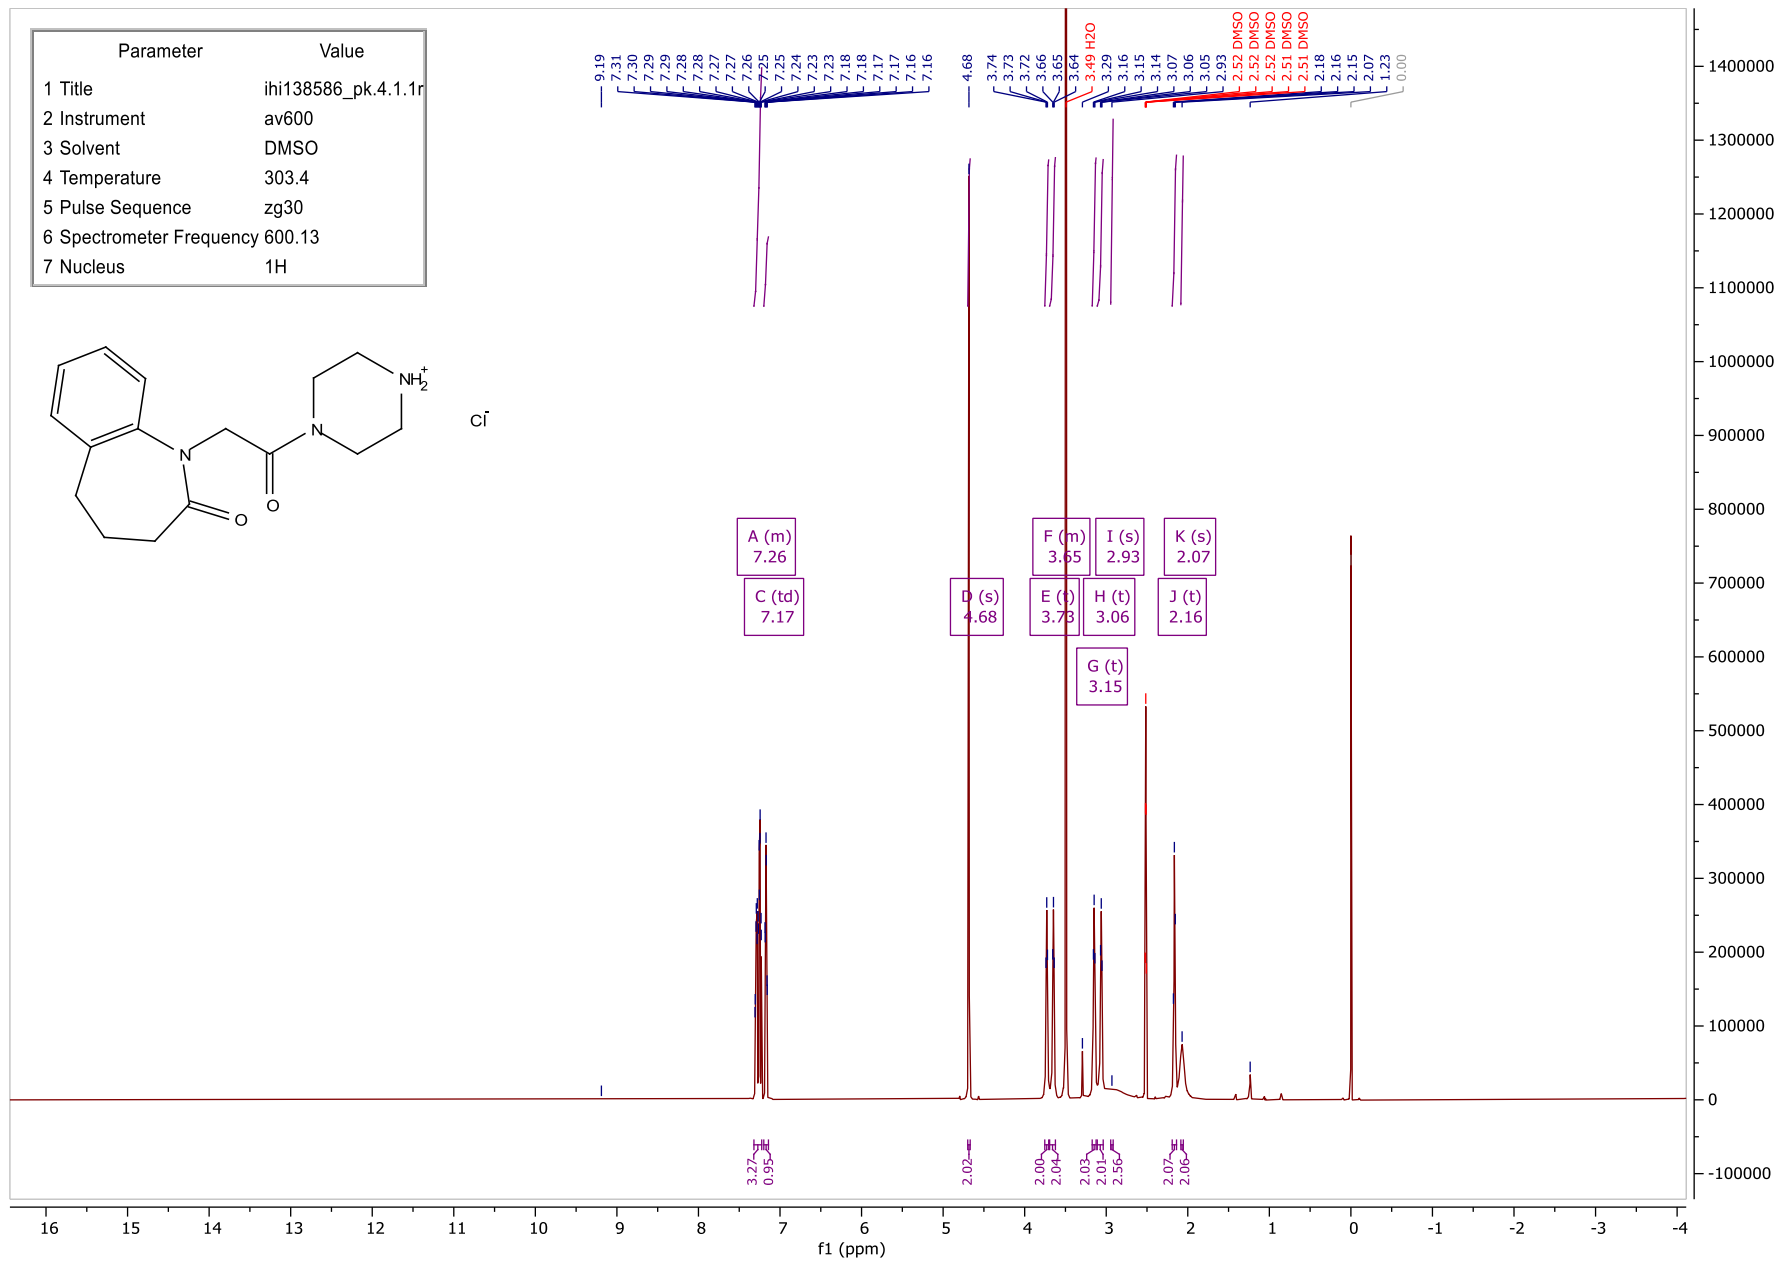

S3 File. Fig 2. <sup>1</sup>H-NMR spectrum of compound 2q after H/D-exchange.

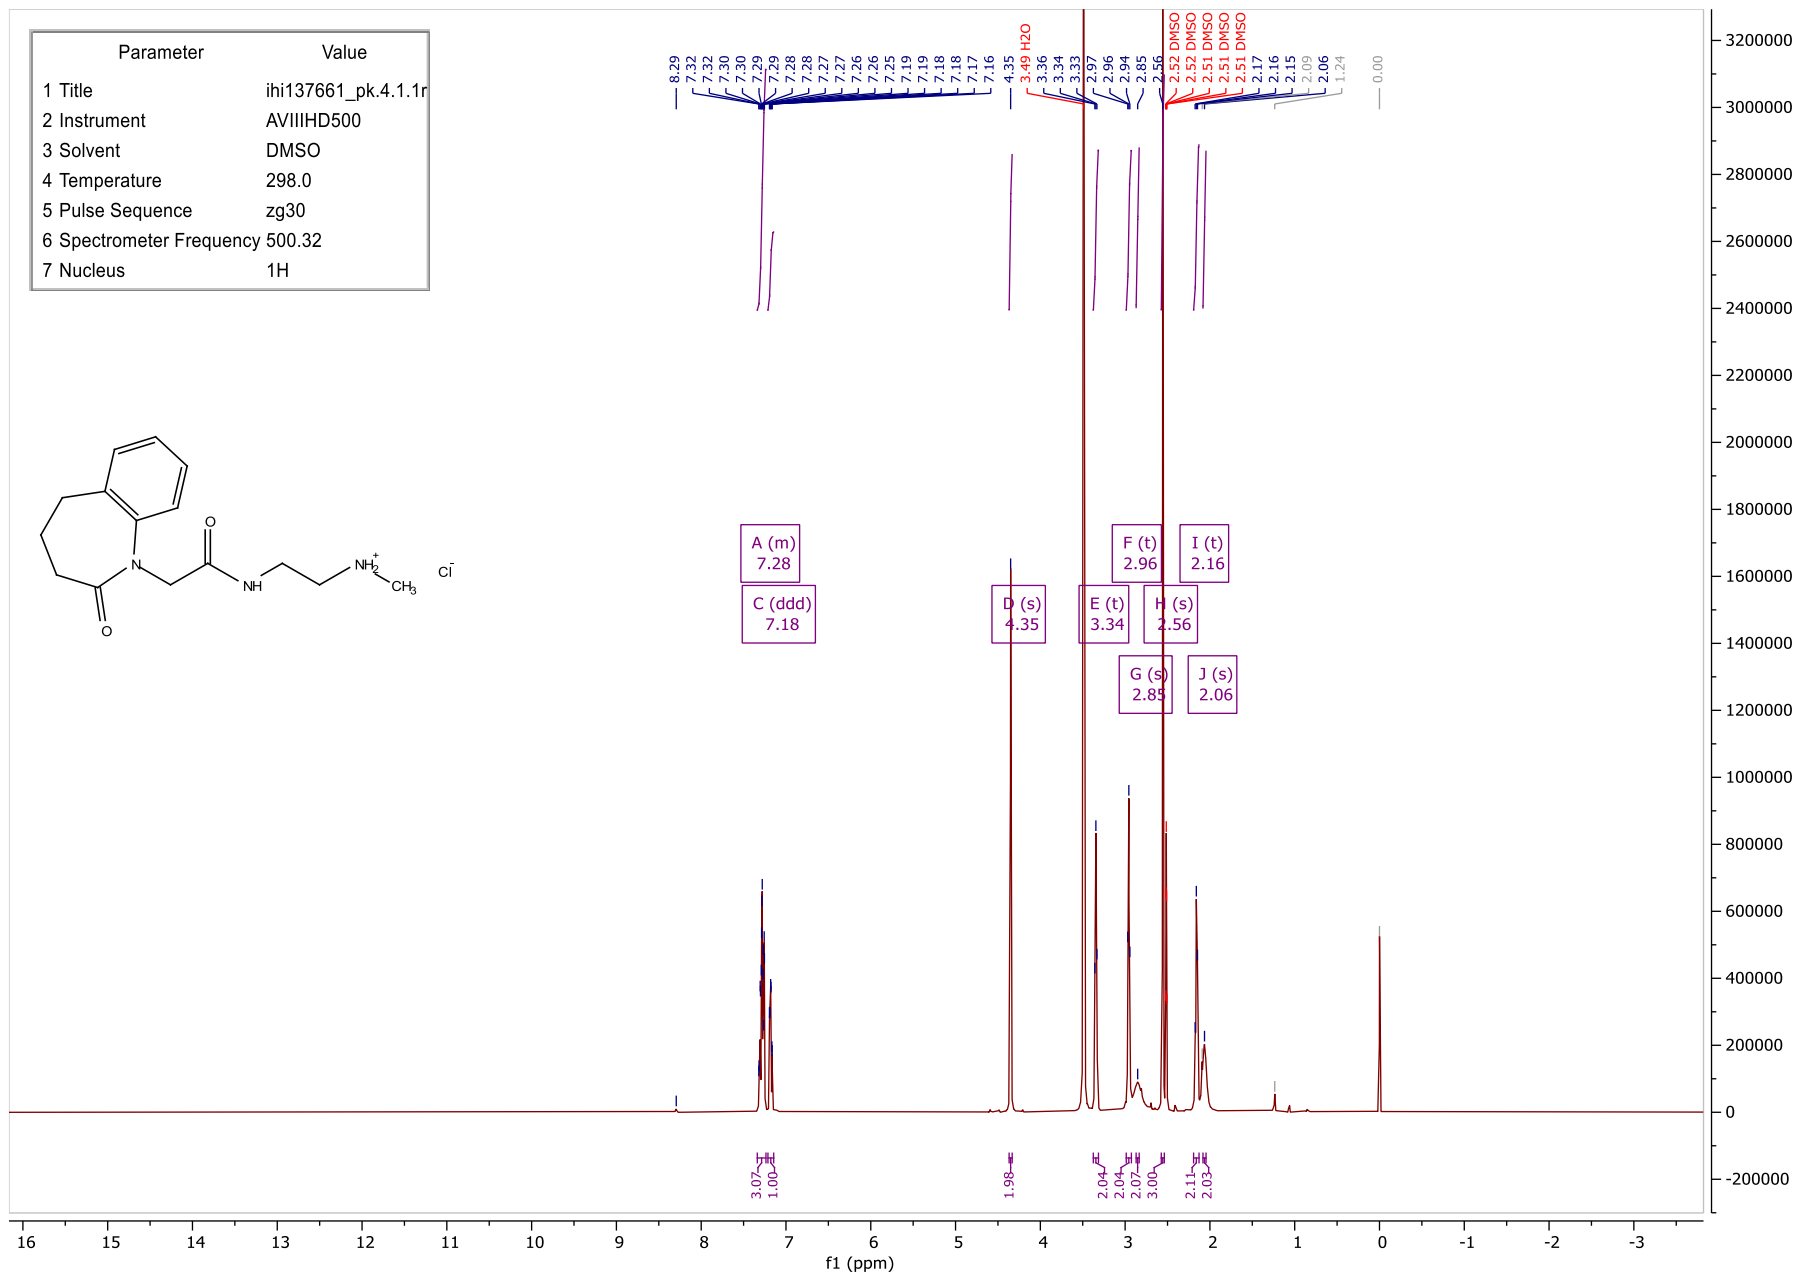

S3 File. Fig 3. <sup>1</sup>H-NMR spectrum of compound 2r after H/D-exchange.

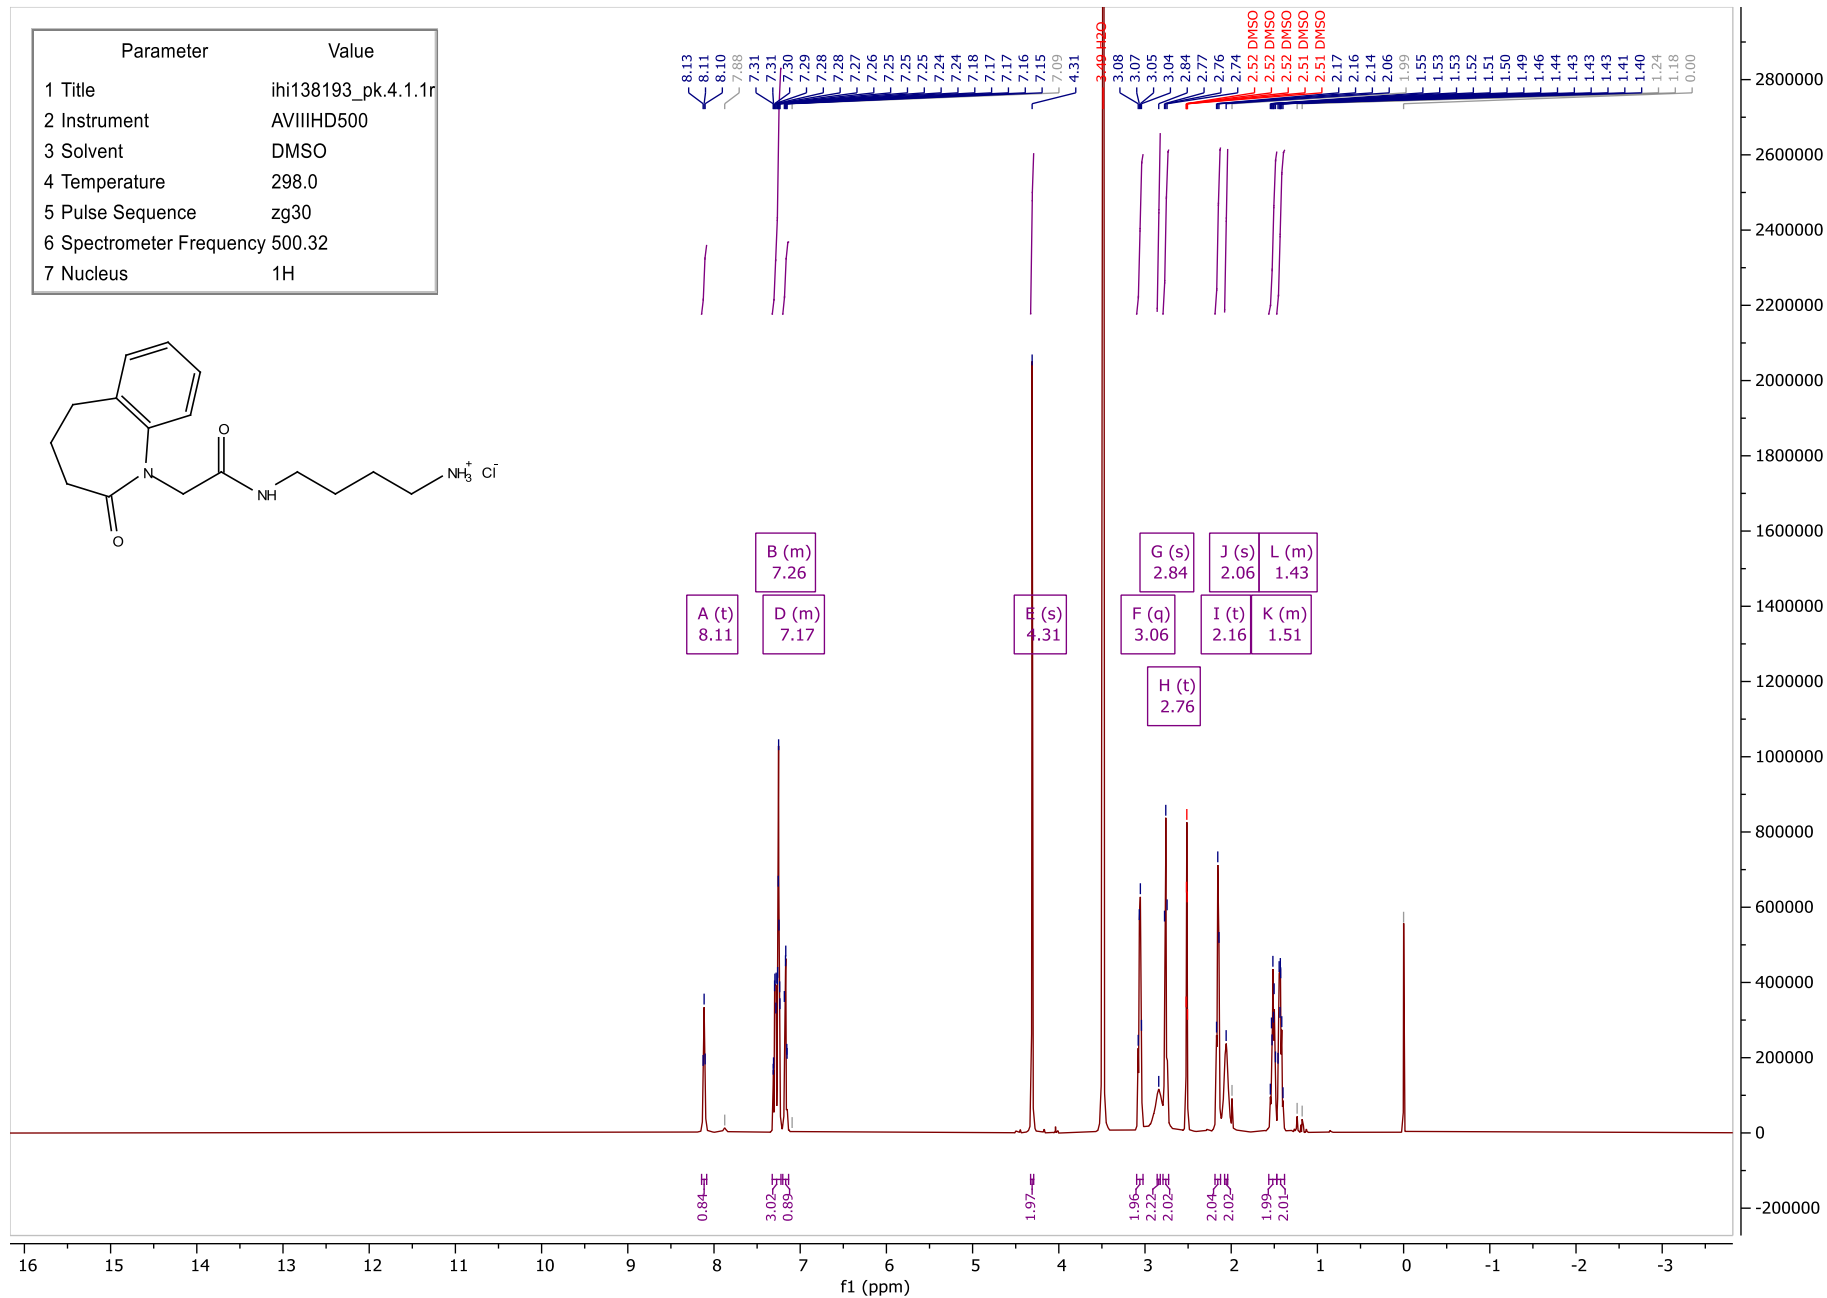

S3 File. Fig 4. <sup>1</sup>H-NMR spectrum of compound 2s after H/D-exchange.

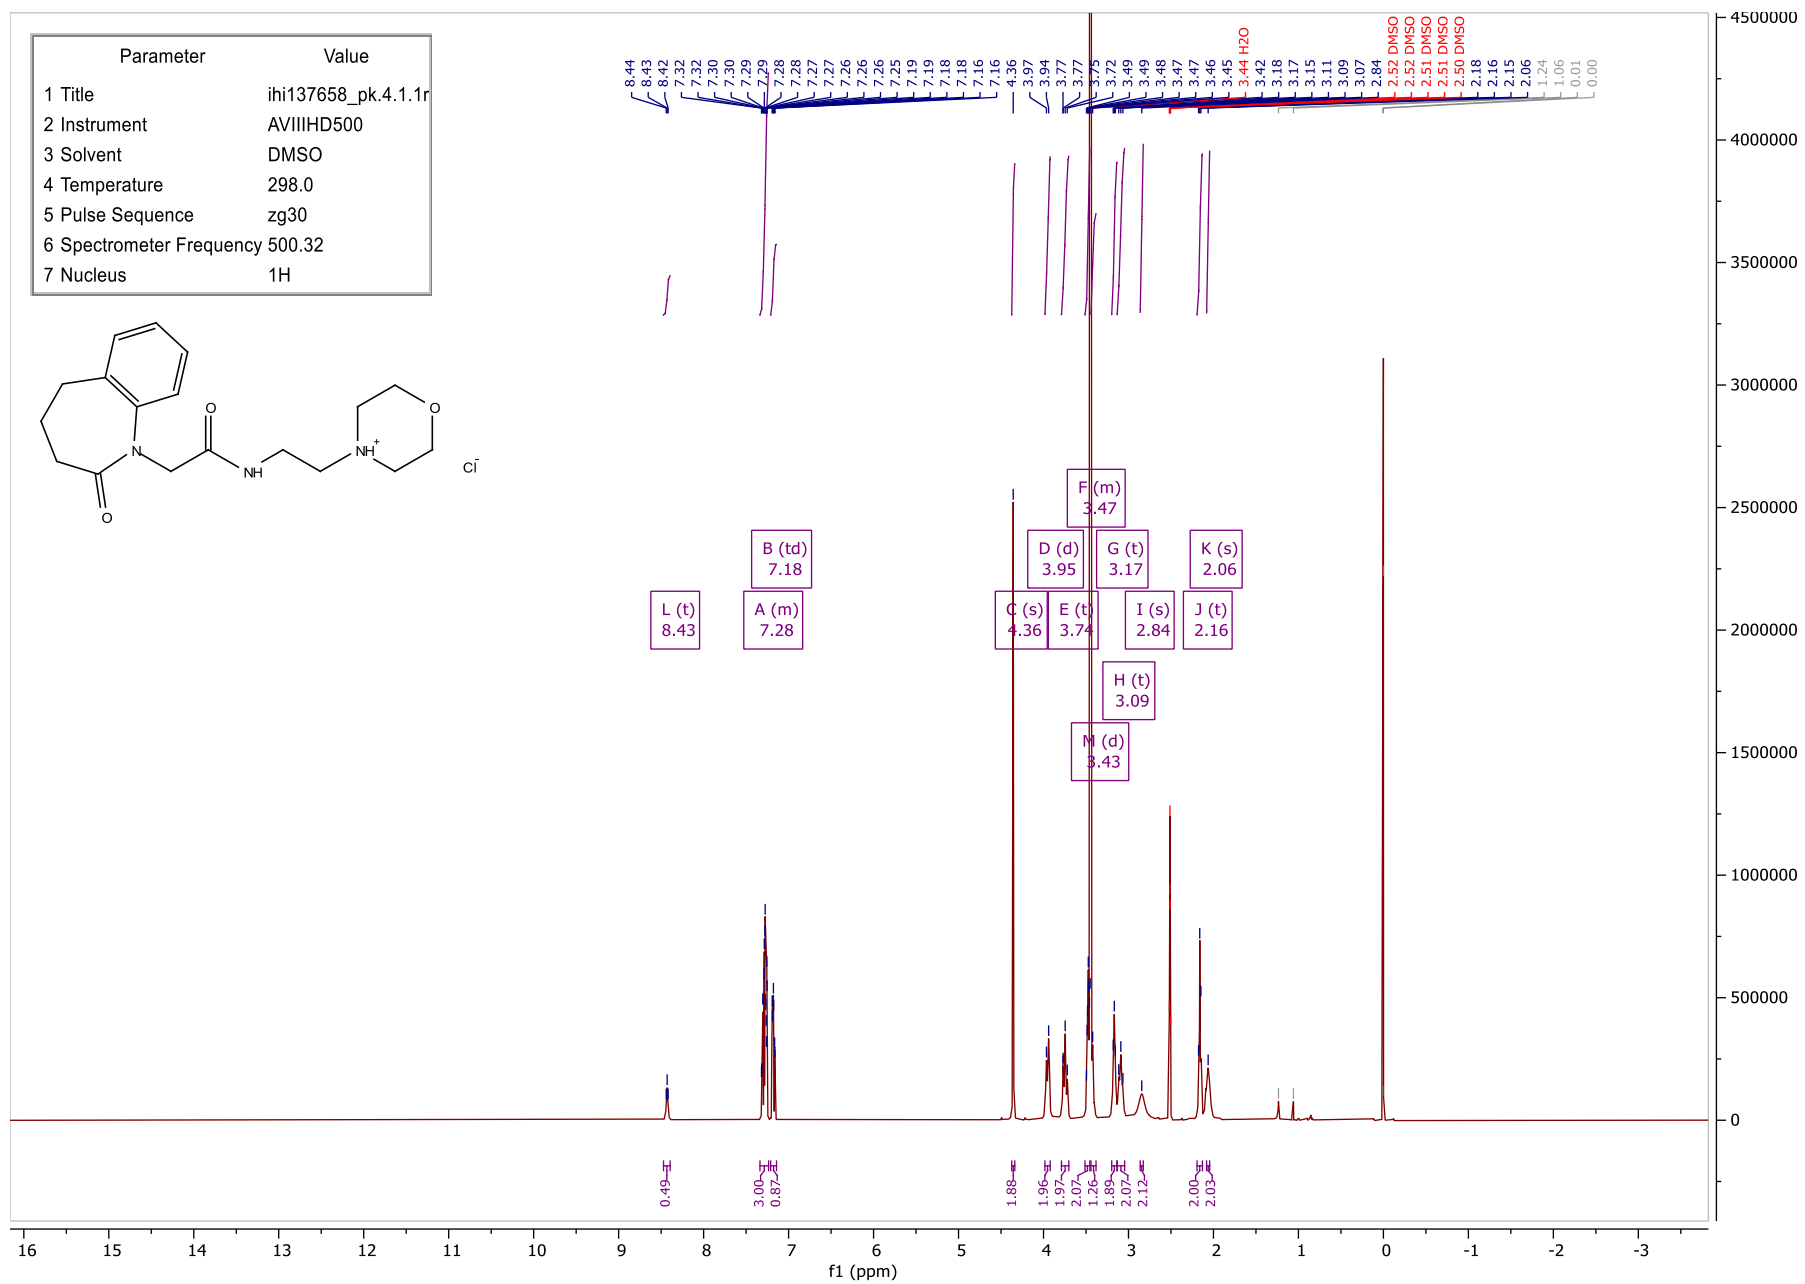

S3 File. Fig 5. <sup>1</sup>H-NMR spectrum of compound 2t after H/D-exchange.

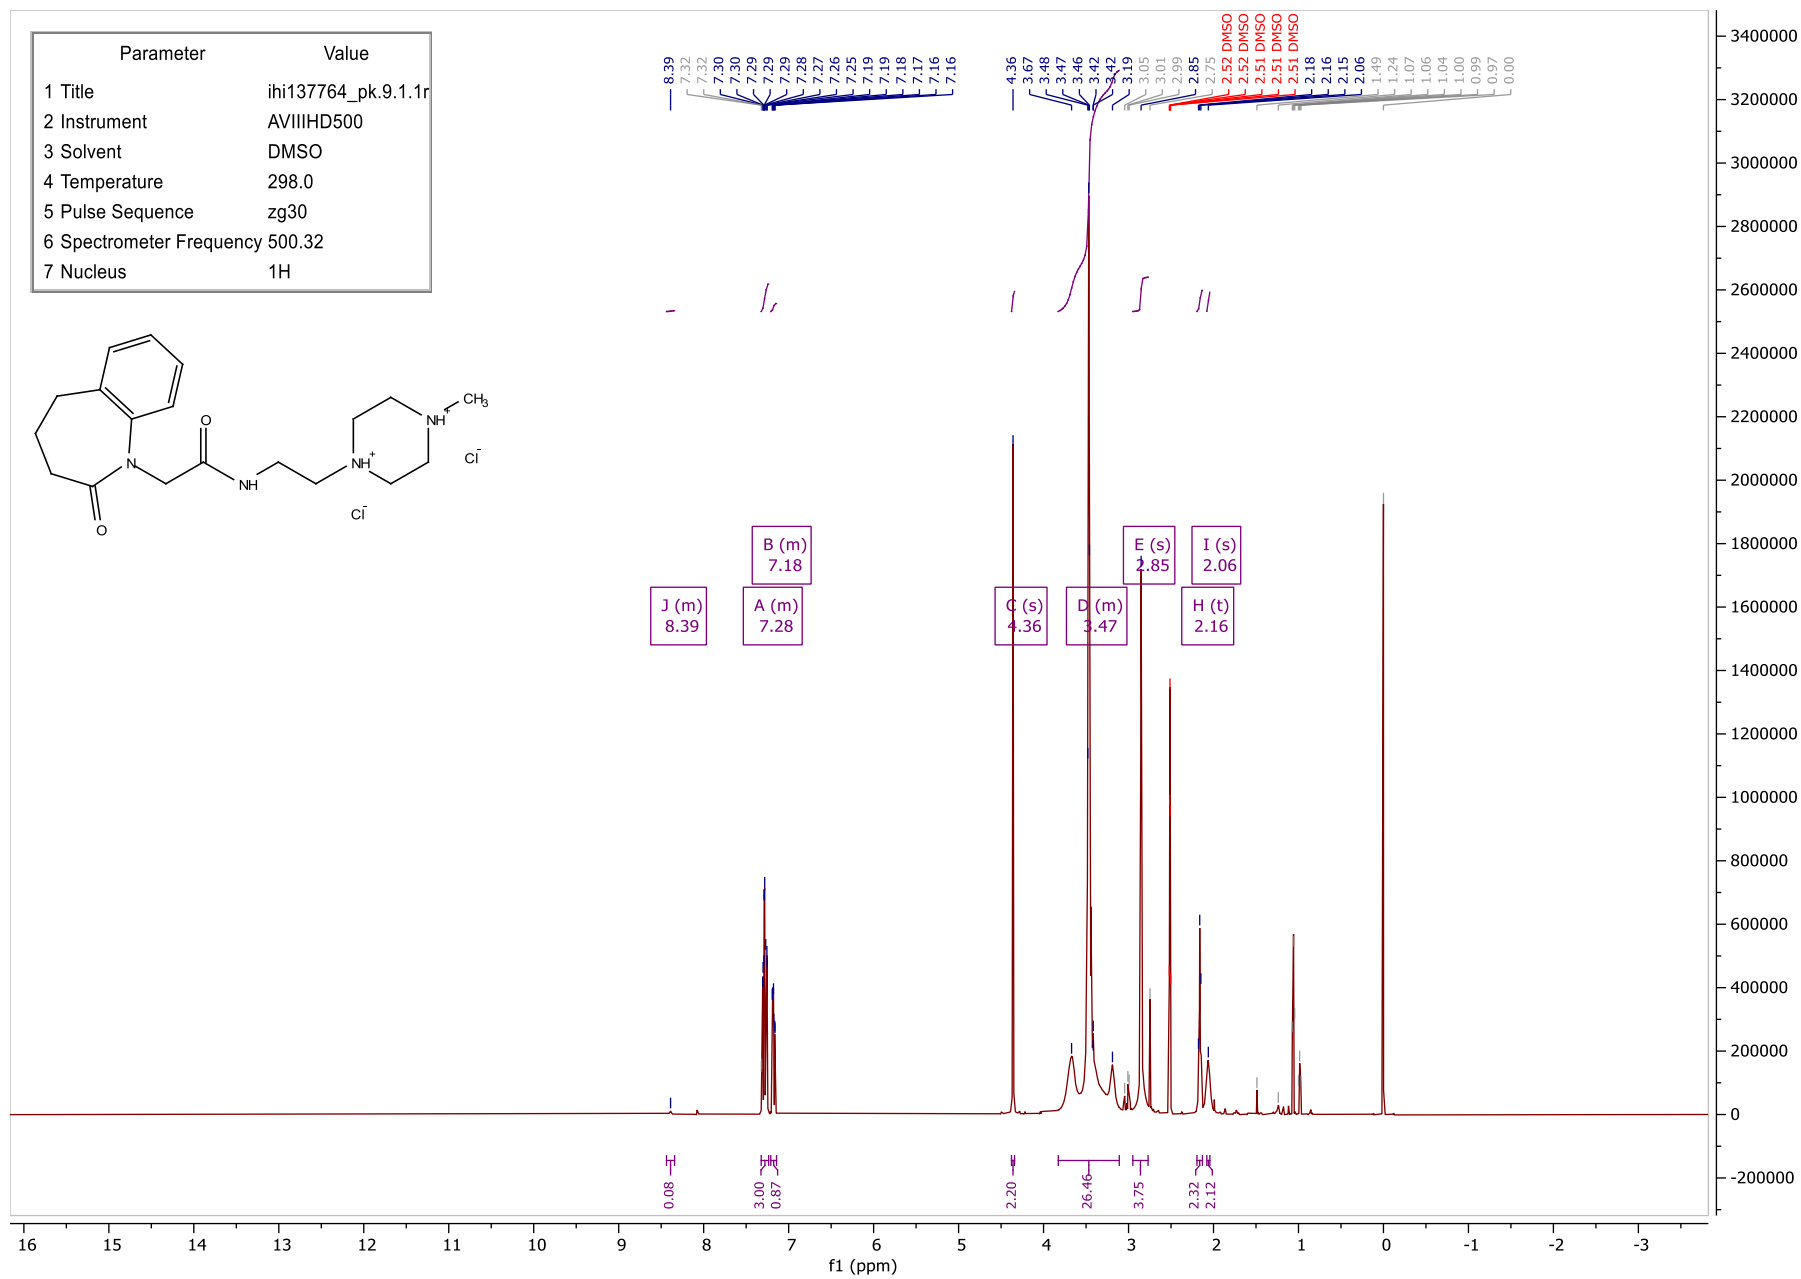

S3 File. Fig 6. <sup>1</sup>H-NMR spectrum of compound 2u after H/D-exchange.



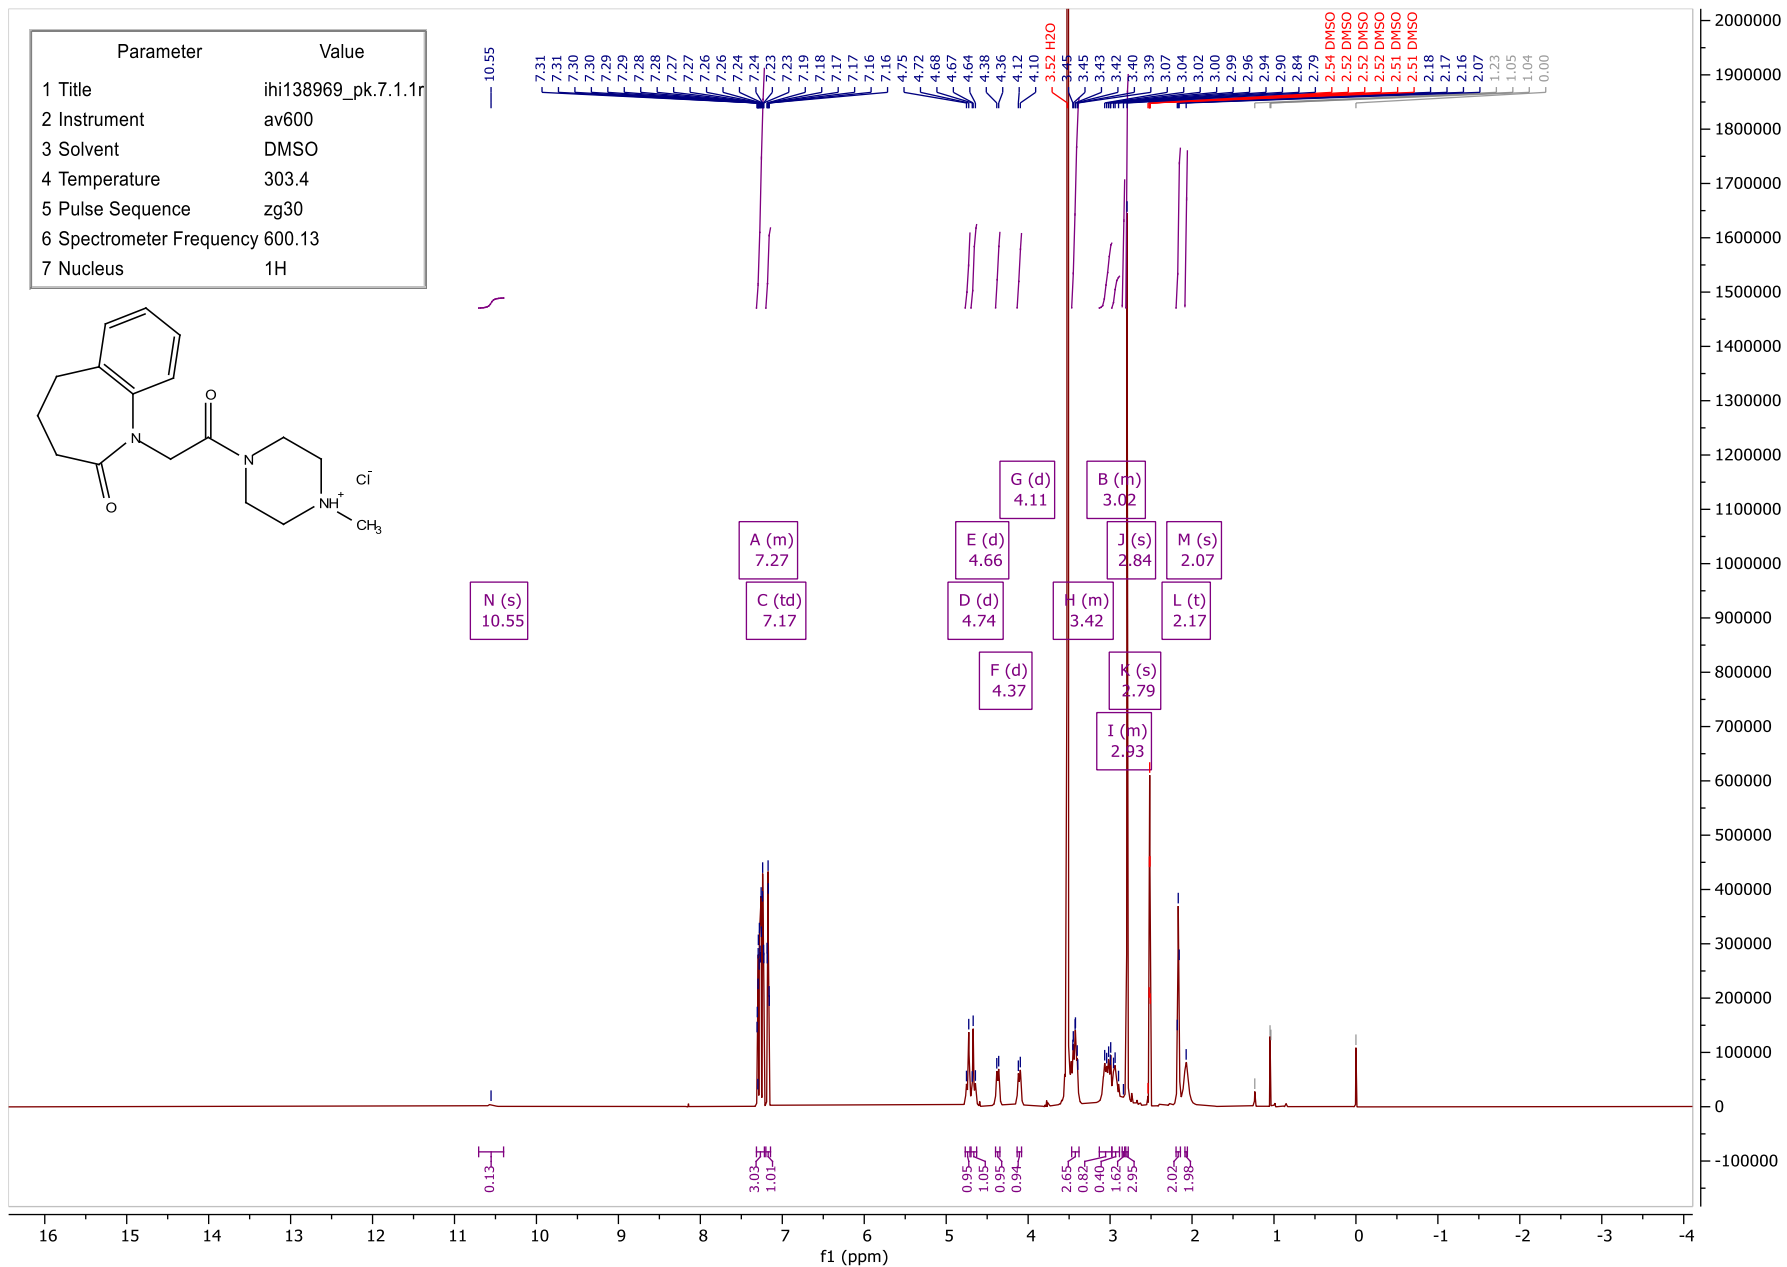

S3 File. Fig 7. <sup>1</sup>H-NMR spectrum of compound 2v after H/D-exchange.

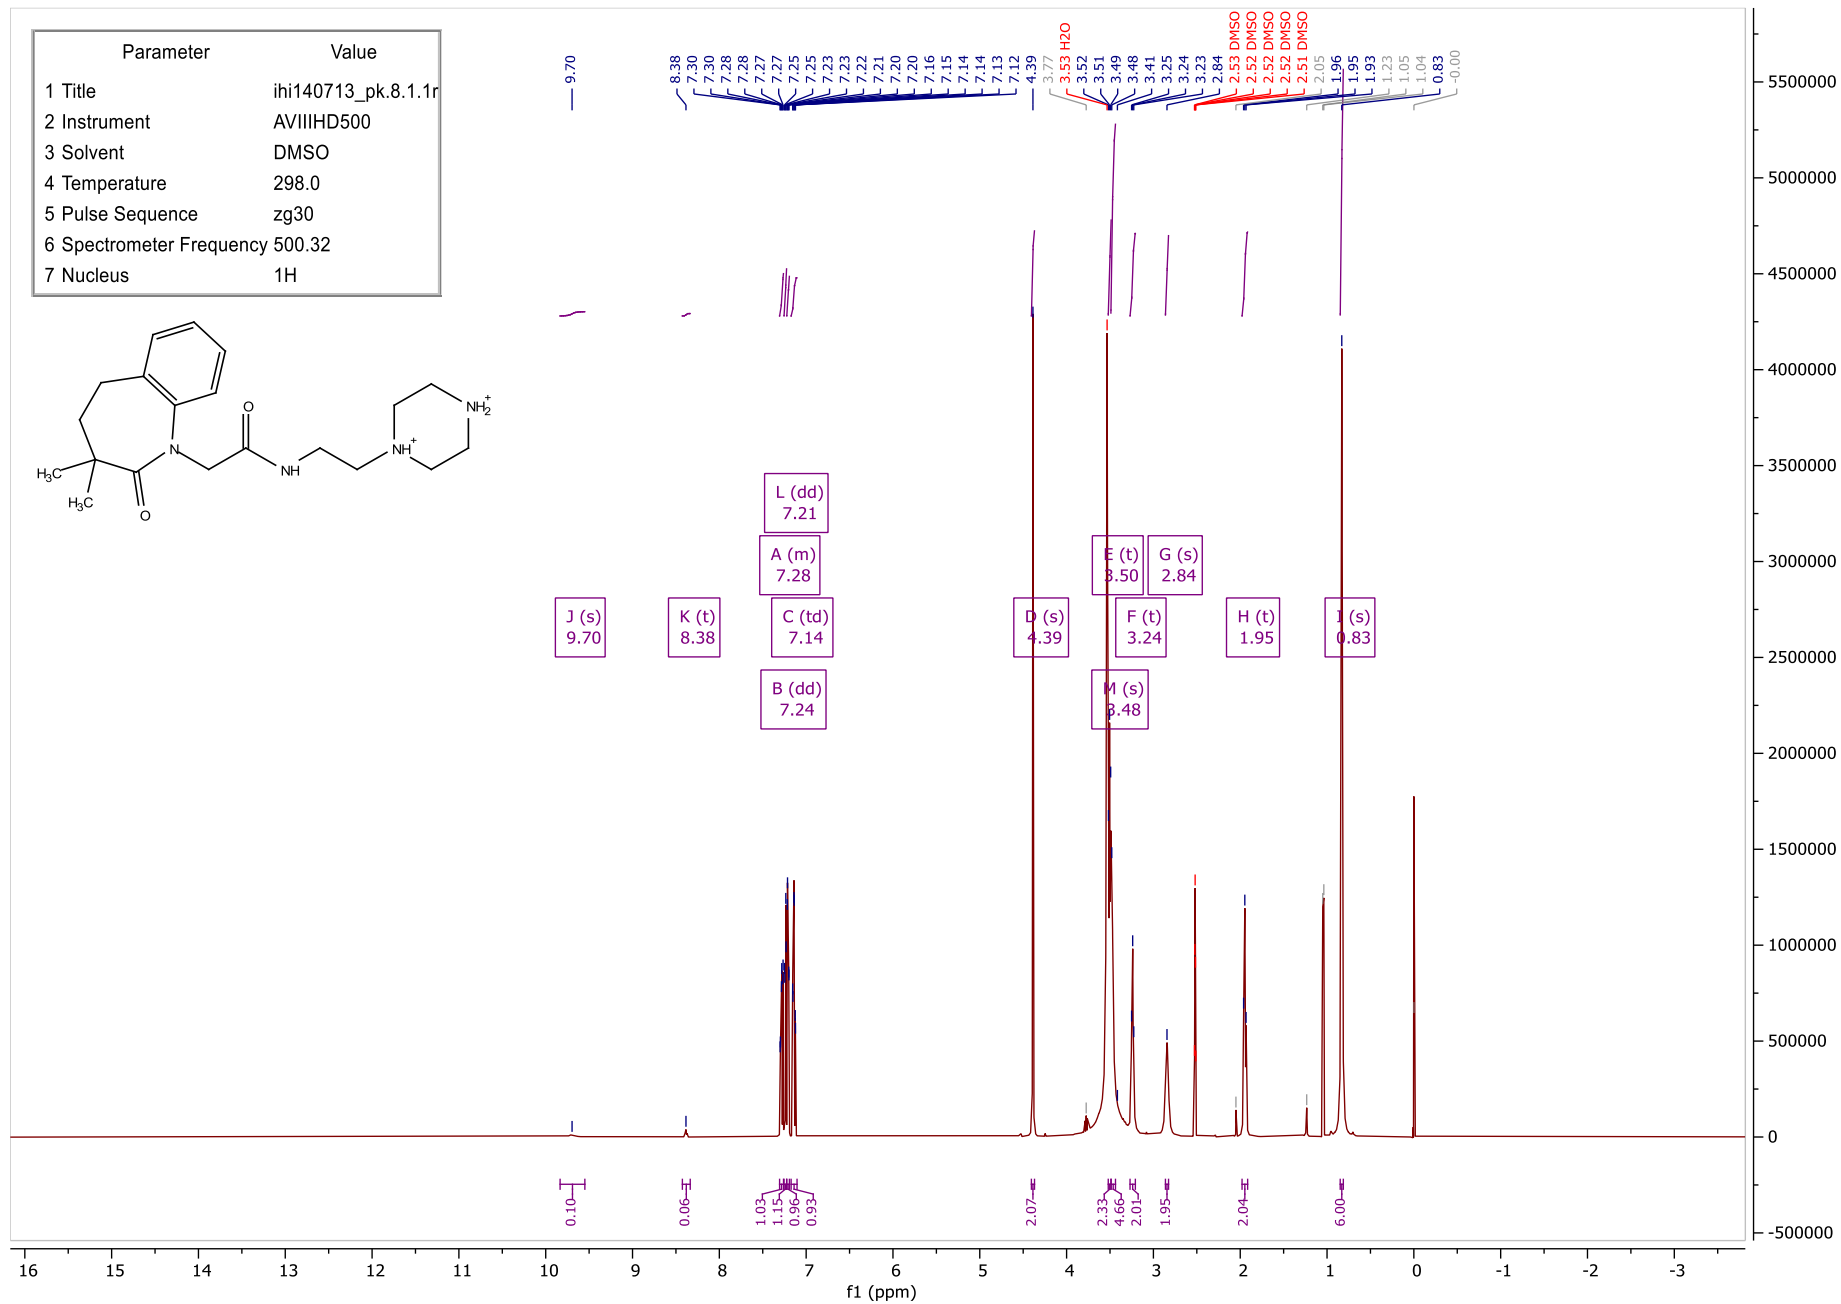

S3 File. Fig 8. <sup>1</sup>H-NMR spectrum of compound 3d after H/D-exchange.

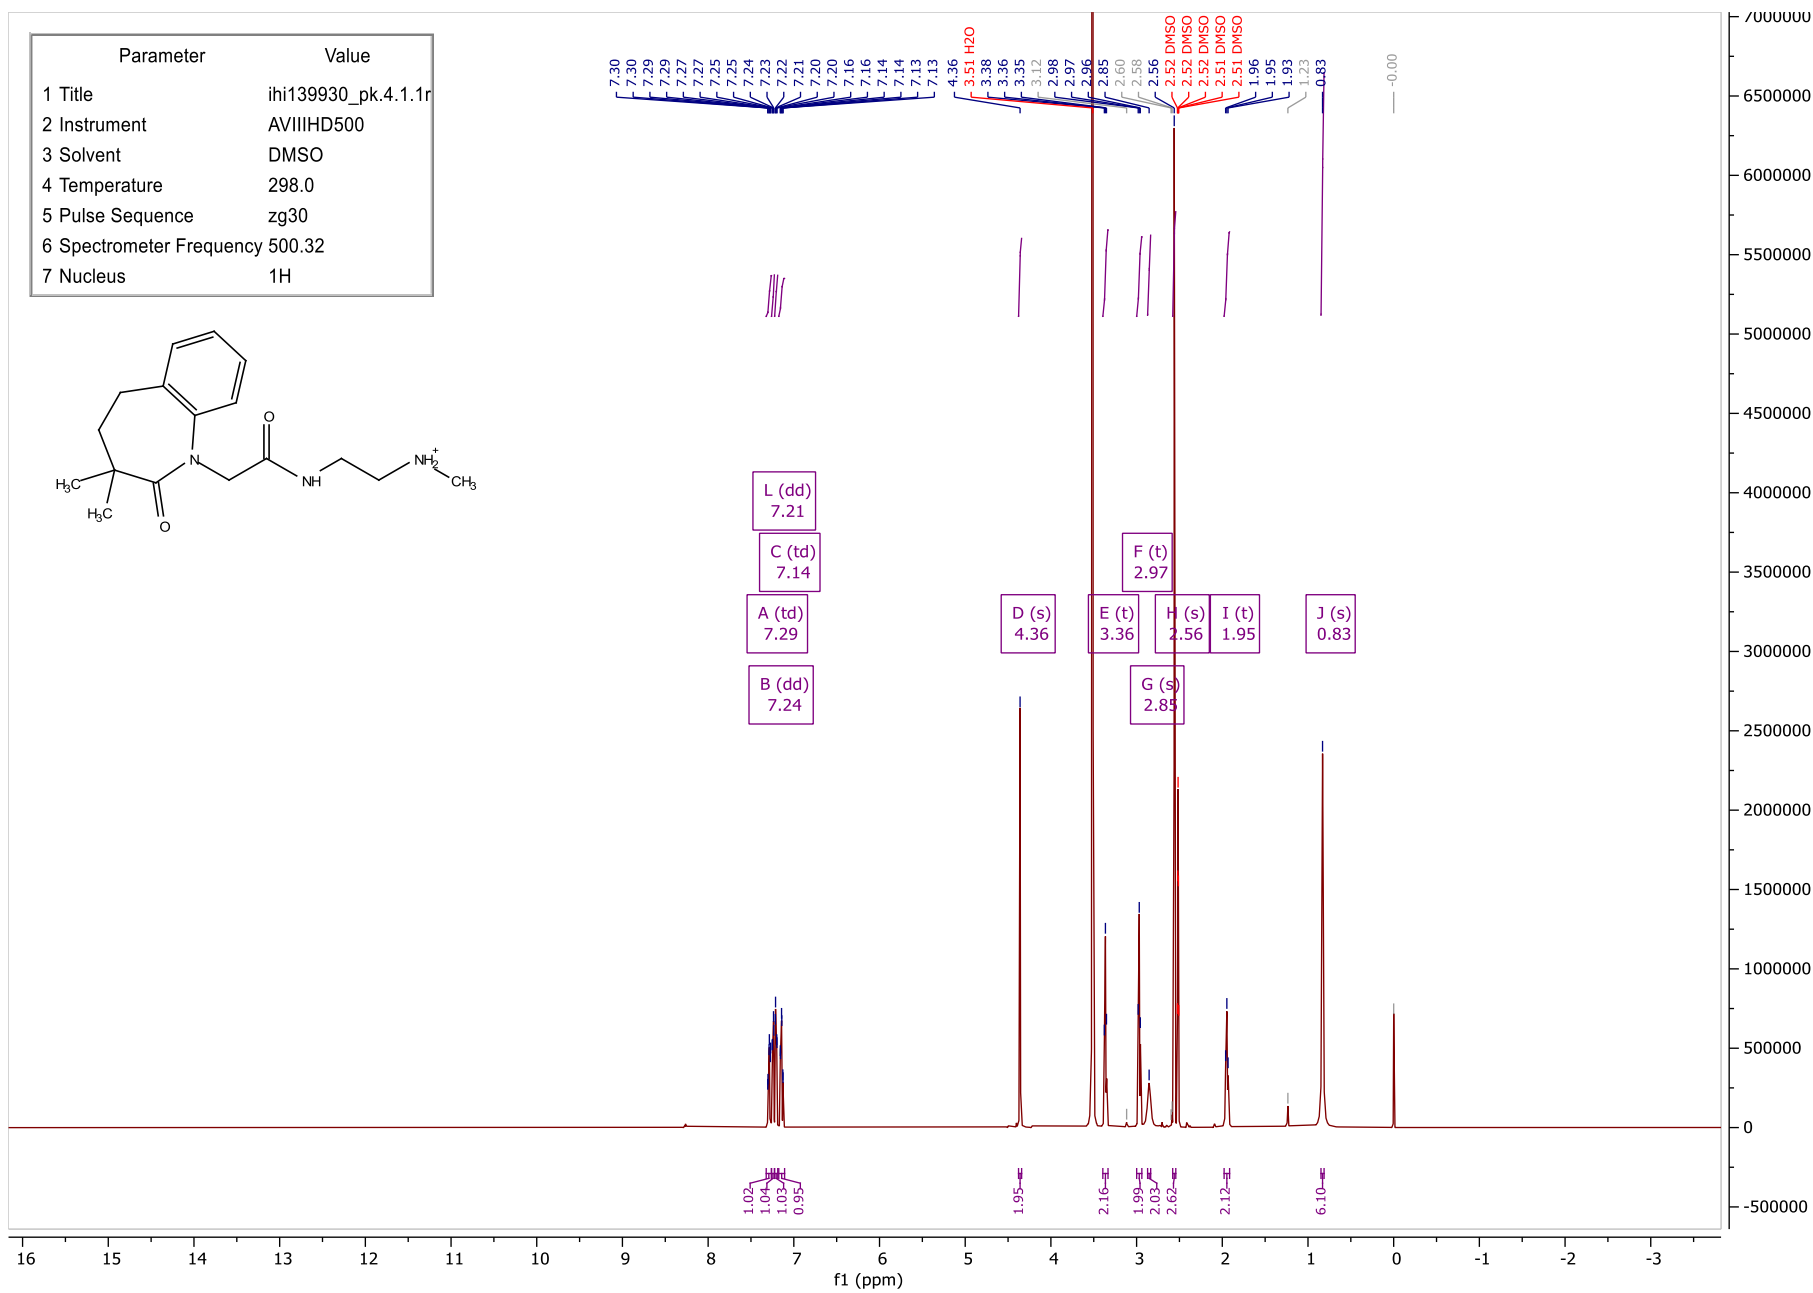

S3 File. Fig 9. <sup>1</sup>H-NMR spectrum of compound 3e after H/D-exchange.

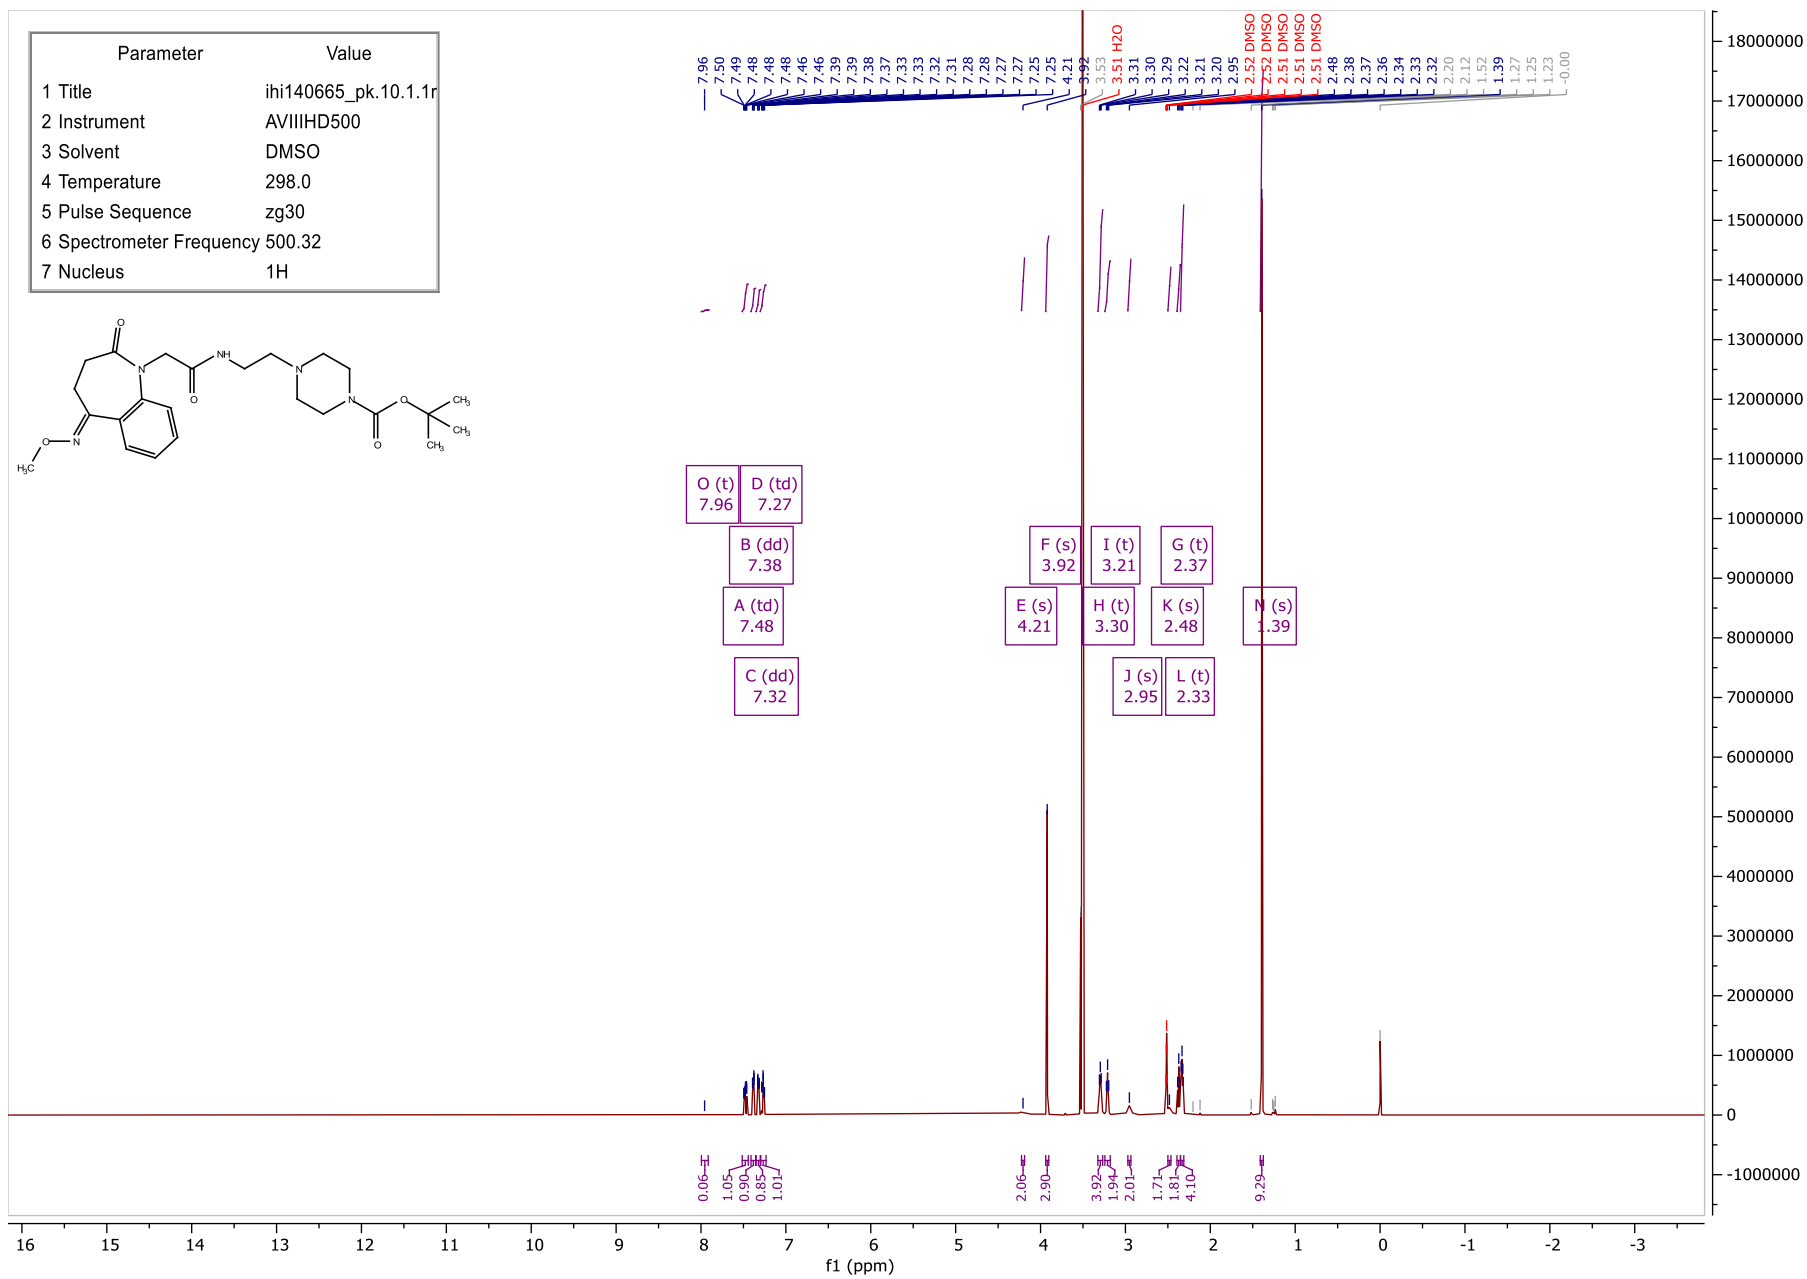

S3 File. Fig 10. <sup>1</sup>H-NMR spectrum of compound 5b after H/D-exchange.

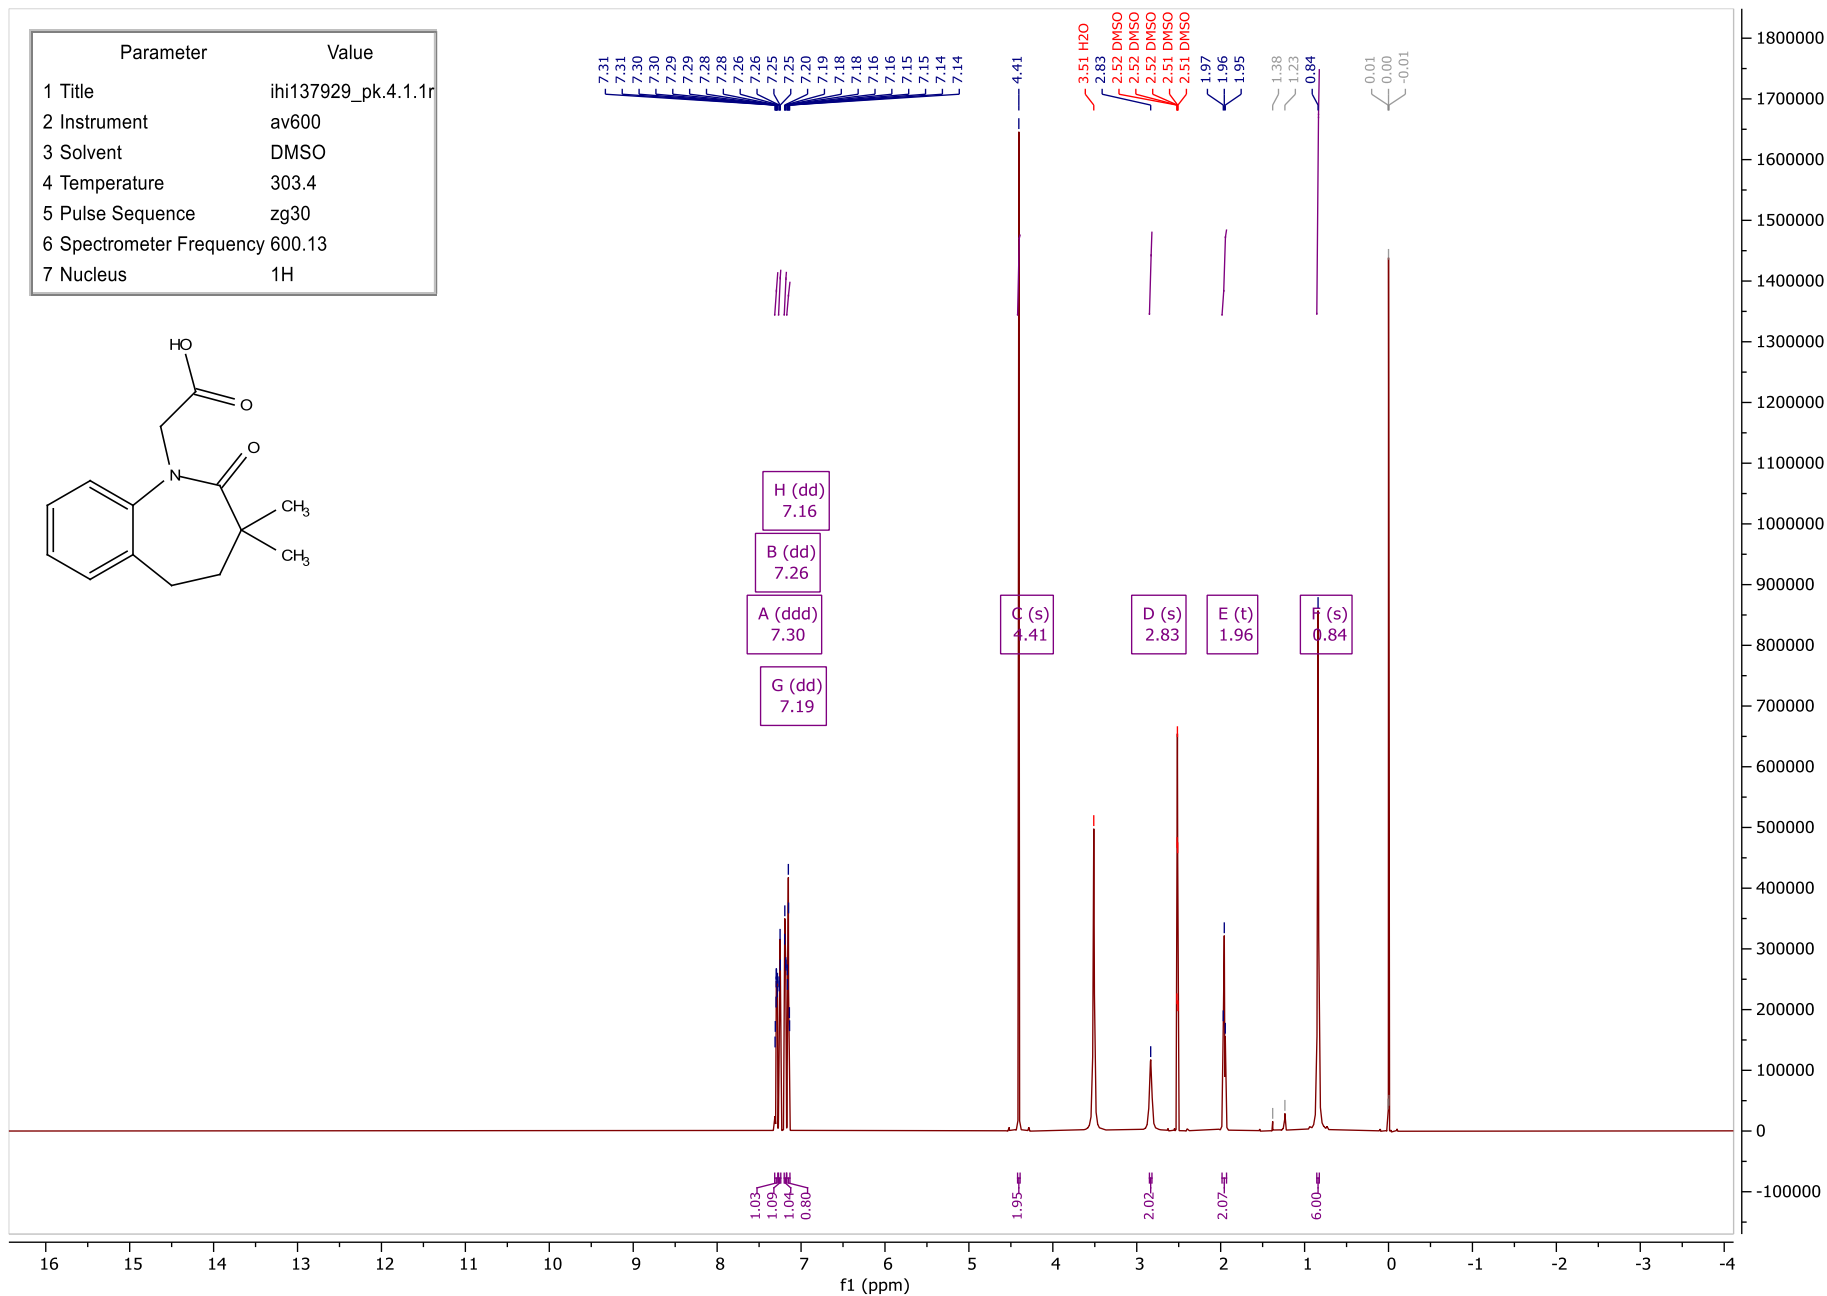

S3 File. Fig 11. <sup>1</sup>H-NMR spectrum of compound 16 after H/D-exchange.
