# Supplementary material for: The indole motif is essential for the antitrypanosomal activity of N5-substituted paullones
Source: PubMed Central journal article supplement (PMC10688702; doi:10.1371/journal.pone.0292946), 2023-11-30
Supplement: pone.0292946.s006.pdf [file pone.0292946.s006.pdf]

# The indole motif is essential for the antitrypanosomal activity of N<sup>5</sup>-substituted paullones

Irina Ihnatenko, Marco J. Müller, Oliver C. F. Orban, Jens C. Lindhof, Diego Benítez, Cecilia Ortíz, Estefanía Dibello, Leonardo L. Seidl, Marcelo A. Comini and Conrad Kunick\*

**S2 Table. Physicochemical properties, water solubility and pharmacokinetics predicted data for benzazepinones and paullones tested in biological assays.**

| #cmpd           | Molecular weight | Fraction Csp3 | #Rotatable bonds | #H-bond acceptors | #H-bond donors | TPSA  | Consensus Log P <sup>2</sup> | ESOL Log S <sup>3</sup> | Ali Log S <sup>3</sup> | Silicos-IT LogSw <sup>3</sup> | GI absorption | BBB permeant | Pgp substrate | Lipinski #violations | Bioavailability Score | PAINS #alerts | Leadlikeness #violations |
|-----------------|------------------|---------------|------------------|-------------------|----------------|-------|------------------------------|-------------------------|------------------------|-------------------------------|---------------|--------------|---------------|----------------------|-----------------------|---------------|--------------------------|
| 1f              | 522.77           | 0.24          | 6                | 3                 | 3              | 77.23 | 3.19                         | -4.92                   | -4.22                  | -8.59                         | High          | Yes          | Yes           | 1                    | 0.55                  | 0             | 1                        |
| 1g              | 431.32           | 0.24          | 6                | 3                 | 3              | 77.23 | 3.05                         | -4.33                   | -4.19                  | -8.36                         | High          | Yes          | Yes           | 0                    | 0.55                  | 0             | 1                        |
| 1h              | 464.87           | 0.27          | 7                | 6                 | 3              | 77.23 | 3.55                         | -4.60                   | -4.46                  | -8.59                         | High          | No           | Yes           | 0                    | 0.55                  | 0             | 1                        |
| 2a <sup>1</sup> | 275.35           | 0.47          | 6                | 3                 | 2              | 61.44 | 1.20                         | -1.70                   | -1.38                  | -4.38                         | High          | No           | Yes           | 0                    | 0.55                  | 0             | 0                        |
| 2b              | 430.54           | 0.61          | 9                | 5                 | 1              | 82.19 | 1.95                         | -3.10                   | -2.99                  | -4.52                         | High          | No           | Yes           | 0                    | 0.55                  | 0             | 2                        |
| 2c              | 361.44           | 0.53          | 9                | 4                 | 2              | 87.74 | 1.88                         | -2.70                   | -3.11                  | -4.85                         | High          | No           | Yes           | 0                    | 0.55                  | 0             | 2                        |
| 2d              | 387.47           | 0.57          | 6                | 4                 | 0              | 70.16 | 1.98                         | -3.13                   | -2.88                  | -3.70                         | High          | No           | Yes           | 0                    | 0.55                  | 0             | 1                        |
| 2e              | 375.46           | 0.55          | 9                | 4                 |                | 78.95 | 2.15                         | -2.90                   | -3.12                  | -4.51                         | High          | No           | Yes           | 0                    | 0.55                  | 0             | 2                        |
| 2f              | 389.49           | 0.57          | 11               | 4                 | 2              | 87.74 | 2.64                         | -3.18                   | -3.85                  | -5.64                         | High          | No           | Yes           | 0                    | 0.55                  | 0             | 2                        |
| 2g              | 401.50           | 0.59          | 7                | 4                 | 1              | 78.95 | 2.32                         | -3.53                   | -3.69                  | -4.45                         | High          | No           | Yes           | 0                    | 0.55                  | 0             | 1                        |
| 2h              | 288.34           | 0.50          | 3                | 3                 | 0              | 49.85 | 1.37                         | -2.12                   | -1.39                  | -3.27                         | High          | No           | Yes           | 0                    | 0.55                  | 0             | 0                        |
| 2i              | 286.37           | 0.53          | 3                | 2                 | 0              | 40.62 | 2.23                         | -2.88                   | -2.46                  | -3.80                         | High          | Yes          | Yes           | 0                    | 0.55                  | 0             | 0                        |
| 2j              | 272.34           | 0.50          | 3                | 2                 | 0              | 40.62 | 1.95                         | -2.57                   | -2.09                  | -3.53                         | High          | Yes          | Yes           | 0                    | 0.55                  | 0             | 0                        |
| 2k              | 274.36           | 0.50          | 5                | 2                 | 0              | 40.62 | 2.21                         | -2.61                   | -2.34                  | -4.00                         | High          | Yes          | No            | 0                    | 0.55                  | 0             | 0                        |
| 2o <sup>1</sup> | 330.42           | 0.56          | 6                | 4                 | 2              | 64.68 | 0.92                         | -1.89                   | -1.25                  | -4.42                         | High          | No           | Yes           | 0                    | 0.55                  | 0             | 0                        |
| 2p <sup>1</sup> | 261.32           | 0.43          | 5                | 3                 | 2              | 75.43 | 0.74                         | -1.37                   | -1.15                  | -3.59                         | High          | No           | Yes           | 0                    | 0.55                  | 0             | 0                        |
| 2q <sup>1</sup> | 287.36           | 0.50          | 3                | 3                 | 1              | 52.65 | 1.07                         | -1.94                   | -1.15                  | -3.58                         | High          | No           | Yes           | 0                    | 0.55                  | 0             | 0                        |
| 2s <sup>1</sup> | 289.37           | 0.50          | 7                | 3                 | 2              | 75.43 | 1.42                         | -1.84                   | -1.89                  | -4.39                         | High          | No           | Yes           | 0                    | 0.55                  | 0             | 0                        |
| 2t <sup>1</sup> | 331.41           | 0.56          | 6                | 4                 | 1              | 61.88 | 1.23                         | -2.07                   | -1.49                  | -4.11                         | High          | No           | Yes           | 0                    | 0.55                  | 0             | 0                        |
| 2u <sup>1</sup> | 344.45           | 0.58          | 6                | 4                 | 1              | 55.89 | 1.21                         | -2.26                   | -1.56                  | -4.08                         | High          | No           | Yes           | 0                    | 0.55                  | 0             | 0                        |
| 2v <sup>1</sup> | 301.38           | 0.53          | 3                | 3                 | 0              | 43.86 | 1.33                         | -2.31                   | -1.46                  | -3.24                         | High          | No           | Yes           | 0                    | 0.55                  | 0             | 0                        |
| 3a <sup>1</sup> | 303.40           | 0.53          | 6                | 3                 | 2              | 61.44 | 1.74                         | -2.44                   | -2.35                  | -5.14                         | High          | Yes          | Yes           | 0                    | 0.55                  | 0             | 0                        |
| 3b              | 458.59           | 0.64          | 9                | 5                 | 1              | 82.19 | 2.51                         | -3.85                   | -3.95                  | -5.26                         | High          | No           | Yes           | 0                    | 0.55                  | 0             | 2                        |
| 3c              | 403.52           | 0.59          | 9                | 4                 | 1              | 78.95 | 2.71                         | -3.65                   | -4.08                  | -5.25                         | High          | No           | Yes           | 0                    | 0.55                  | 0             | 2                        |
| 3d <sup>1</sup> | 358.48           | 0.60          | 6                | 4                 | 2              | 64.68 | 1.52                         | -2.63                   | -2.22                  | -5.16                         | High          | No           | Yes           | 0                    | 0.55                  | 0             | 1                        |
| 4b              | 478.58           | 0.44          | 9                | 5                 | 1              | 82.19 | 2.61                         | -4.12                   | -4.00                  | -6.43                         | High          | No           | Yes           | 0                    | 0.55                  | 0             | 2                        |

| #cmpd           | Molecular weight | Fraction Csp3 | #Rotatable bonds | #H-bond acceptors | #H-bond donors | TPSA   | Consensus Log P <sup>2</sup> | ESOL Log S <sup>3</sup> | Ali Log S <sup>3</sup> | Silicos-IT LogSw <sup>3</sup> | GI absorption | BBB permeant | Pgp substrate | Lipinski #violations | Bioavailability Score | PAINS #alerts | Leadlikeness #violations |
|-----------------|------------------|---------------|------------------|-------------------|----------------|--------|------------------------------|-------------------------|------------------------|-------------------------------|---------------|--------------|---------------|----------------------|-----------------------|---------------|--------------------------|
| 4c              | 423.50           | 0.38          | 9                | 4                 | 1              | 78.95  | 2.80                         | -3.93                   | -4.13                  | -6.43                         | High          | Yes          | Yes           | 0                    | 0.55                  | 0             | 2                        |
| 4d <sup>1</sup> | 378.47           | 0.36          | 6                | 4                 | 2              | 64.68  | 1.62                         | -2.93                   | -2.27                  | -6.34                         | High          | No           | Yes           | 0                    | 0.55                  | 0             | 1                        |
| 5b              | 473.57           | 0.58          | 10               | 7                 | 1              | 103.78 | 1.76                         | -3.08                   | -3.10                  | -4.64                         | High          | No           | Yes           | 0                    | 0.55                  | 0             | 2                        |
| 5c              | 315.37           | 0.47          | 4                | 4                 | 0              | 62.21  | 1.69                         | -2.54                   | -2.21                  | -3.67                         | High          | Yes          | Yes           | 0                    | 0.55                  | 0             | 0                        |
| 5d <sup>1</sup> | 373.45           | 0.53          | 7                | 6                 | 2              | 86.27  | 0.69                         | -1.86                   | -1.37                  | -4.55                         | High          | No           | Yes           | 0                    | 0.55                  | 0             | 1                        |
| 9a              | 466.66           | 0.11          | 2                | 3                 | 2              | 73.40  | 3.44                         | -5.33                   | -4.85                  | -6.78                         | High          | Yes          | No            | 0                    | 0.85                  | 0             | 2                        |
| 9b              | 375.21           | 0.11          | 2                | 3                 | 2              | 73.40  | 3.32                         | -4.74                   | -4.82                  | -6.53                         | High          | Yes          | No            | 0                    | 0.85                  | 0             | 2                        |
| 9c              | 408.76           | 0.16          | 3                | 6                 | 2              | 73.40  | 3.81                         | -5.00                   | -5.09                  | -6.77                         | High          | No           | No            | 0                    | 0.85                  | 0             | 2                        |
| 10a             | 622.88           | 0.35          | 9                | 4                 | 2              | 94.74  | 4.13                         | -6.09                   | -5.95                  | -8.65                         | High          | No           | Yes           | 1                    | 0.55                  | 0             | 3                        |
| 10b             | 531.43           | 0.35          | 9                | 4                 | 2              | 94.74  | 4.04                         | -5.51                   | -5.93                  | -8.43                         | High          | No           | Yes           | 1                    | 0.55                  | 0             | 3                        |
| 10c             | 564.98           | 0.37          | 10               | 7                 | 2              | 94.74  | 4.56                         | -5.80                   | -6.20                  | -8.66                         | Low           | No           | Yes           | 1                    | 0.55                  | 0             | 3                        |
| 13              | 219.24           | 0.33          | 2                | 3                 | 1              | 57.61  | 1.33                         | -2.10                   | -2.01                  | -2.52                         | High          | Yes          | No            | 0                    | 0.85                  | 0             | 1                        |
| 16              | 247.29           | 0.43          | 2                | 3                 | 1              | 57.61  | 1.94                         | -2.83                   | -2.97                  | -3.28                         | High          | Yes          | No            | 0                    | 0.85                  | 0             | 1                        |
| 18              | 323.39           | 0.30          | 4                | 3                 | 0              | 46.61  | 3.35                         | -4.15                   | -4.15                  | -5.97                         | High          | Yes          | No            | 0                    | 0.55                  | 0             | 0                        |
| 19              | 267.28           | 0.12          | 2                | 3                 | 1              | 57.61  | 2.09                         | -3.18                   | -3.01                  | -4.47                         | High          | Yes          | No            | 0                    | 0.85                  | 0             | 0                        |
| 20              | 204.23           | 0.27          | 1                | 3                 | 1              | 50.69  | 1.49                         | -2.03                   | -1.76                  | -3.61                         | High          | Yes          | No            | 0                    | 0.55                  | 0             | 1                        |
| 21              | 318.37           | 0.47          | 5                | 5                 | 0              | 68.20  | 2.40                         | -3.06                   | -3.26                  | -4.18                         | High          | Yes          | No            | 0                    | 0.55                  | 0             | 0                        |
| 22              | 262.26           | 0.31          | 3                | 5                 | 1              | 79.20  | 1.13                         | -2.06                   | -2.13                  | -2.67                         | High          | No           | No            | 0                    | 0.56                  | 0             | 0                        |

All calculations performed with SwissADME from SMILES of neutral and uncharged compounds as recommended by the software [1]. <sup>1</sup>The neutral compound was used for calculations instead of the biologically tested hydrochloride form. **2a** is the free base to the hydrochloride **2r**, and **3a** is the free base to the hydrochloride **3e**; <sup>2</sup>Consensus clogP from ilogP, XlogP3, WlogP, MlogP and SILICOS-IT; <sup>3</sup>Theoretical aqueous solubility was calculated by two topological methods: ESOL [2] and one adopted from Ali *et al.* [3]; or the fragmental method from SILICOS-IT in SwissADME [1].

## References

- Daina A, Michielin O, Zoete V. SwissADME: a free web tool to evaluate pharmacokinetics, drug-likeness and medicinal chemistry friendliness of small molecules. *Sci Rep.* 2017; 7:1–13. doi: 10.1038/srep42717.
- Delaney JS. ESOL: Estimating aqueous solubility directly from molecular structure. *J Chem Inf Comput Sci.* 2004; 44:1000–5. doi: 10.1021/ci034243x PMID: 15154768.
- Ali J, Camilleri P, Brown MB, Hutt AJ, Kirton SB. Revisiting the general solubility equation: in silico prediction of aqueous solubility incorporating the effect of topographical polar surface area. *J Chem Inf Model.* 2012; 52:420–8. Epub 2012/01/13. doi: 10.1021/ci200387c PMID: 22196228.
